# Supplementary material for: Directed gas phase preparation of ethynylallene (H2CCCHCCH; X1A′) via the crossed molecular beam reaction of the methylidyne radical (CH; X2Π) with vinylacetylene (H2CCHCCH; X1A′)
Source: Royal Society of Chemistry journal article supplement (doi:10.1039/d2cp04081f), 2022-01-01
Supplement: d2cp04081f1.pdf [file d2cp04081f1.pdf]

## Supporting Information

### Directed Gas Phase Preparation of Ethynylallene (CH<sub>2</sub>CCHCCH; X<sup>1</sup>A') via the Crossed Molecular Beam Reaction of the Methylidyne Radical (CH; X<sup>2</sup>Π) with Vinylacetylene (H<sub>2</sub>CCHCCH; X<sup>1</sup>A')

Chao He,<sup>a</sup> Zhenghai Yang,<sup>a</sup> Srinivas Doddipatla,<sup>a</sup> Aaron M. Thomas,<sup>a</sup> Ralf I. Kaiser<sup>a\*</sup>

*Department of Chemistry, University of Hawai'i at Mānoa, Honolulu, HI 96822, USA*

Galiya R. Galimova,<sup>b</sup> Alexander M. Mebel,<sup>b\*</sup>

*<sup>b</sup> Department of Chemistry and Biochemistry, Florida International University, Miami, Florida  
33199, USA*

Kazuumi Fujioka,<sup>a</sup> Rui Sun<sup>a\*</sup>

*Department of Chemistry, University of Hawai'i at Mānoa, Honolulu, HI 96822, USA*

Corresponding Author Prof. Dr. Ralf I. Kaiser: [ralfk@hawaii.edu](mailto:ralfk@hawaii.edu)

Corresponding Author Prof. Dr. Alexander M. Mebel: [mebela@fiu.edu](mailto:mebela@fiu.edu)

Corresponding Author Prof. Rui Sun: [ruisun@hawaii.edu](mailto:ruisun@hawaii.edu)

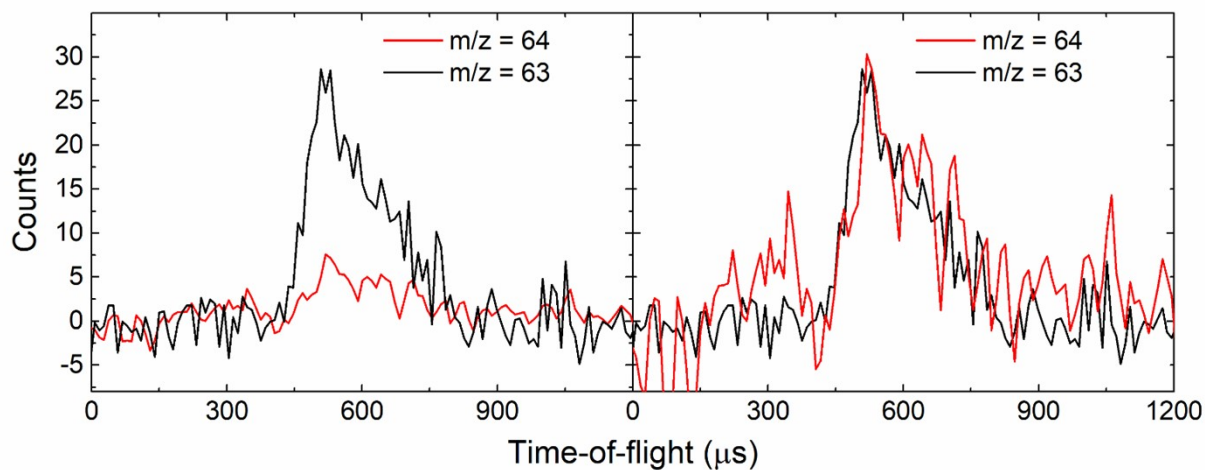

**Figure S1.** Time-of-flight spectra recorded at the CM angles for  $m/z = 63$  ( $C_5H_3^+$ ) and  $m/z = 64$  ( $C_5H_4^+$ ) for the reaction of the methylidyne radical (CH) with vinylacetylene ( $C_4H_4$ ). The left and right panels depict raw and scaled TOF spectra, respectively. Since both traces overlap, signal at  $m/z = 63$  represents a fragment of  $m/z = 64$ .

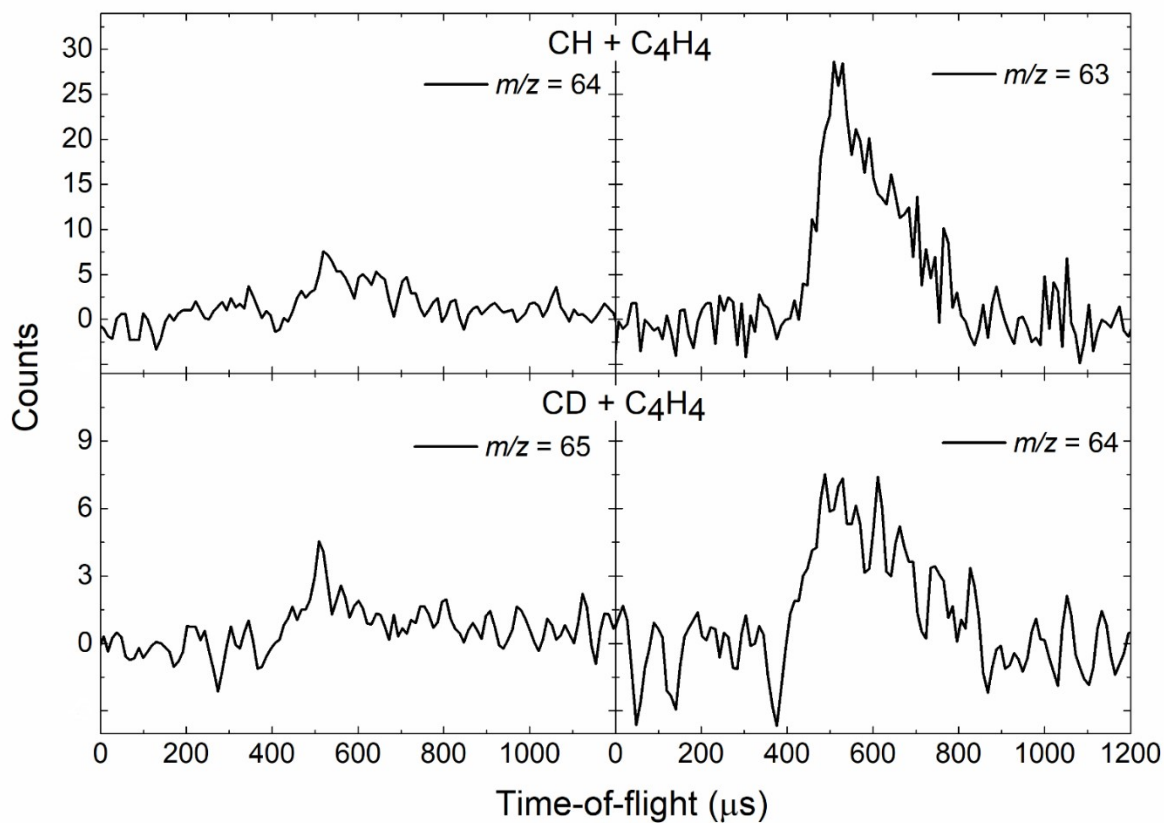

**Figure S2.** Time-of-flight spectra for the reaction of methylidyne radical (CH) with vinylacetylene (C<sub>4</sub>H<sub>4</sub>) (top), and D1-methylidyne radical (CD) with vinylacetylene (C<sub>4</sub>H<sub>4</sub>) (bottom).

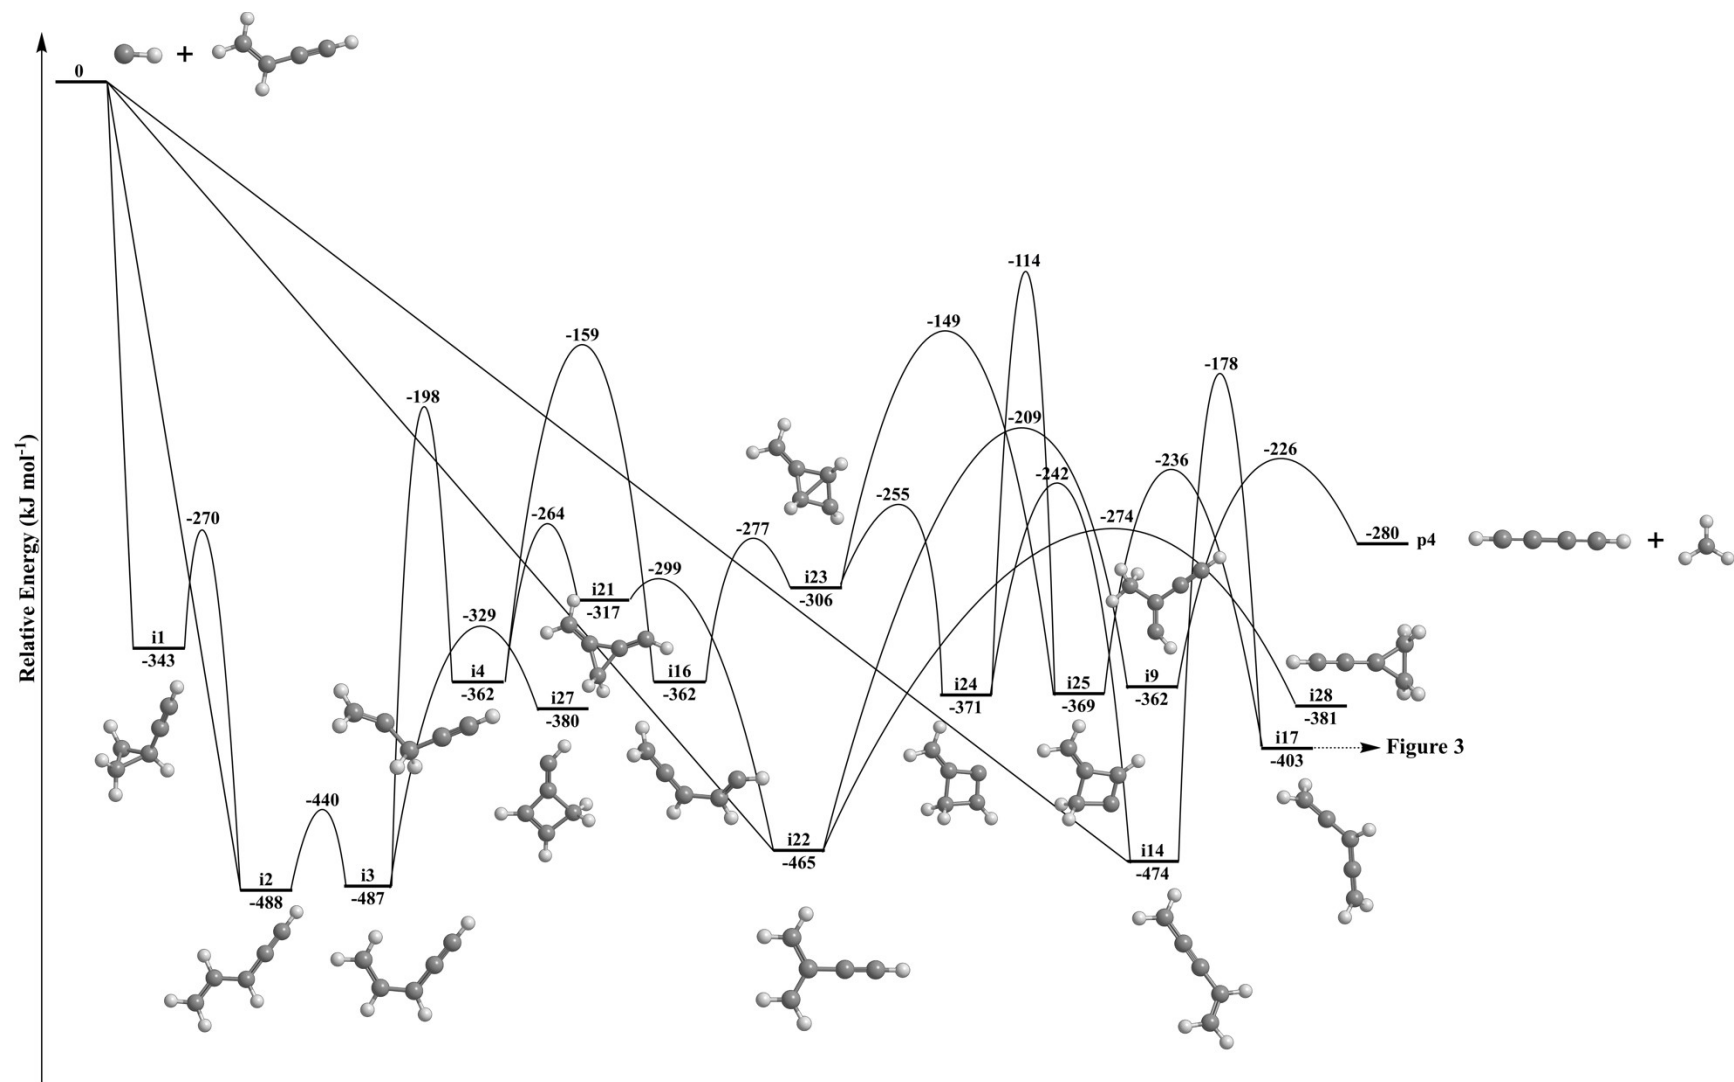

Figure S3. Portion of  $C_5H_5$  potential energy surface (PES) leading to p4.

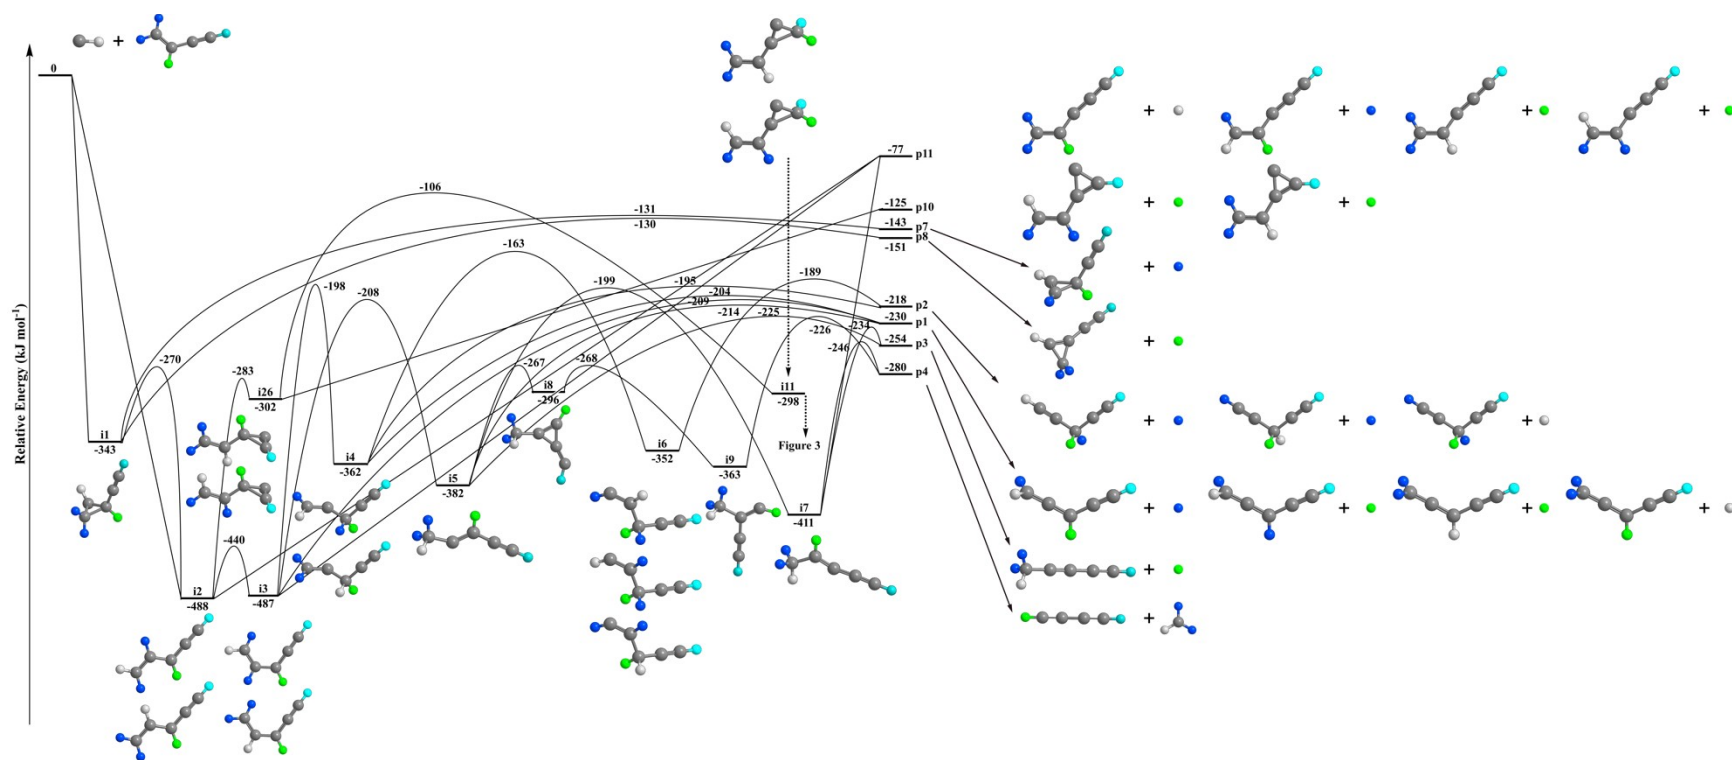

**Figure S4.** Portion of  $\text{C}_5\text{H}_5$  potential energy surface (PES) leading to **p1-p4**, **p7**, **p8**, **p10**, and **p11**. H atoms from methylidyne radical, CH moiety,  $\text{CH}_2$  moiety, and terminal CH moiety of vinylacetylene reactant are highlighted in grey, green, blue, and cyan, respectively.

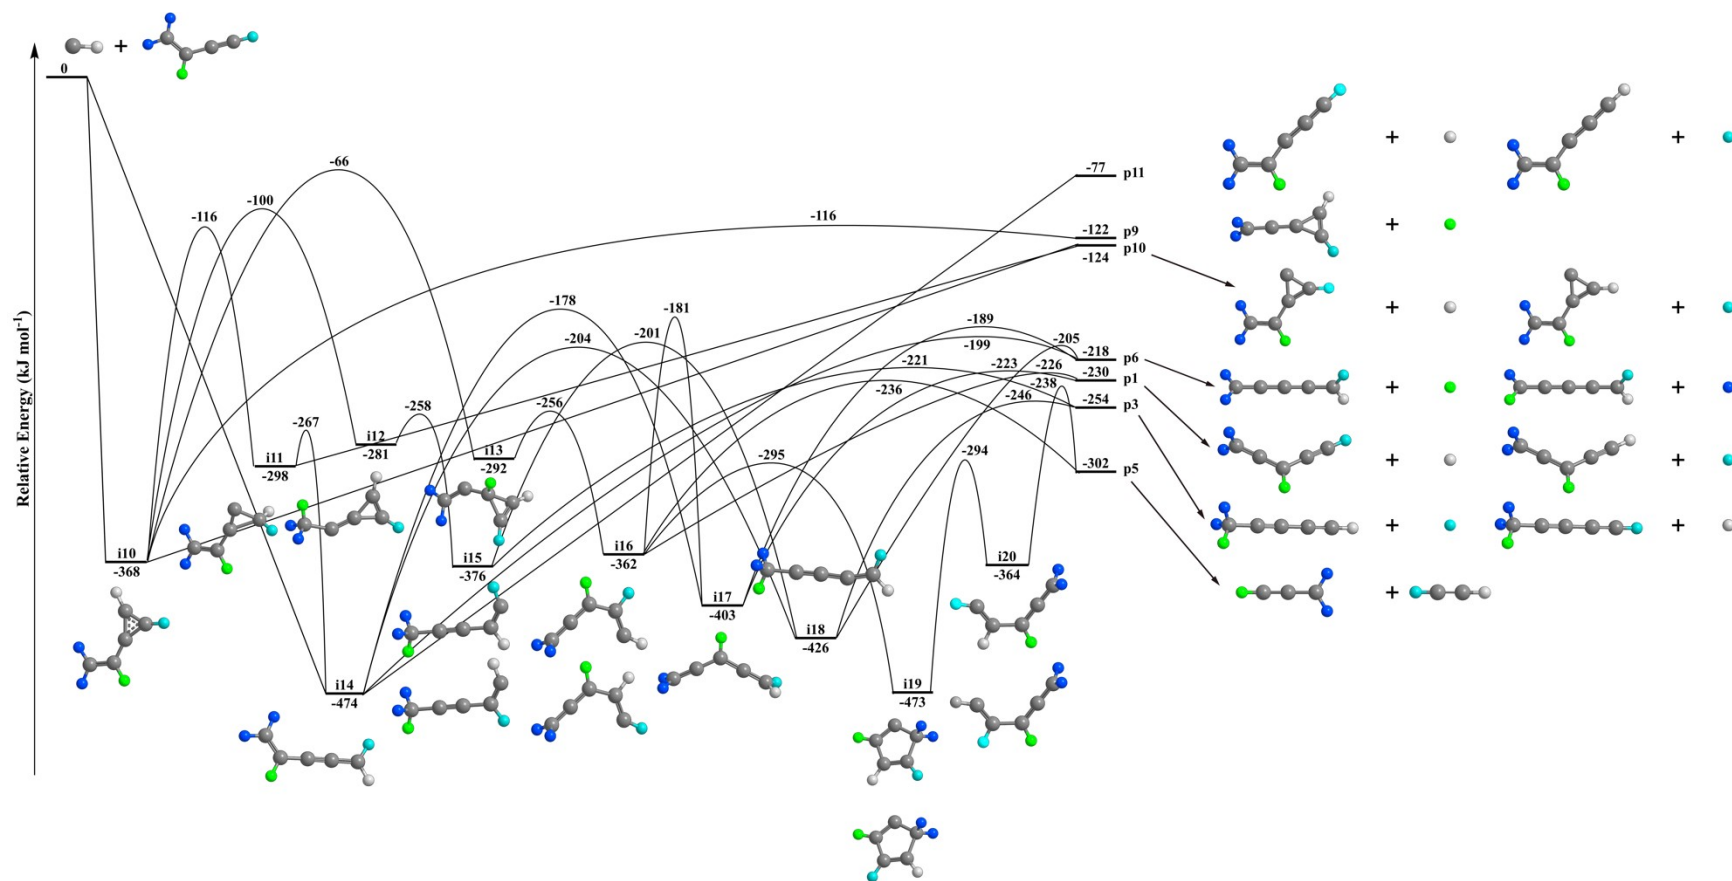

**Figure S5.** Portion of C<sub>5</sub>H<sub>5</sub> potential energy surface (PES) leading to **p1**, **p3**, **p5**, **p6**, and **p9-p11**. H atoms from methylidyne radical, CH moiety, CH<sub>2</sub> moiety, and terminal CH moiety of vinylacetylene reactant are highlighted in grey, green, blue, and cyan, respectively.

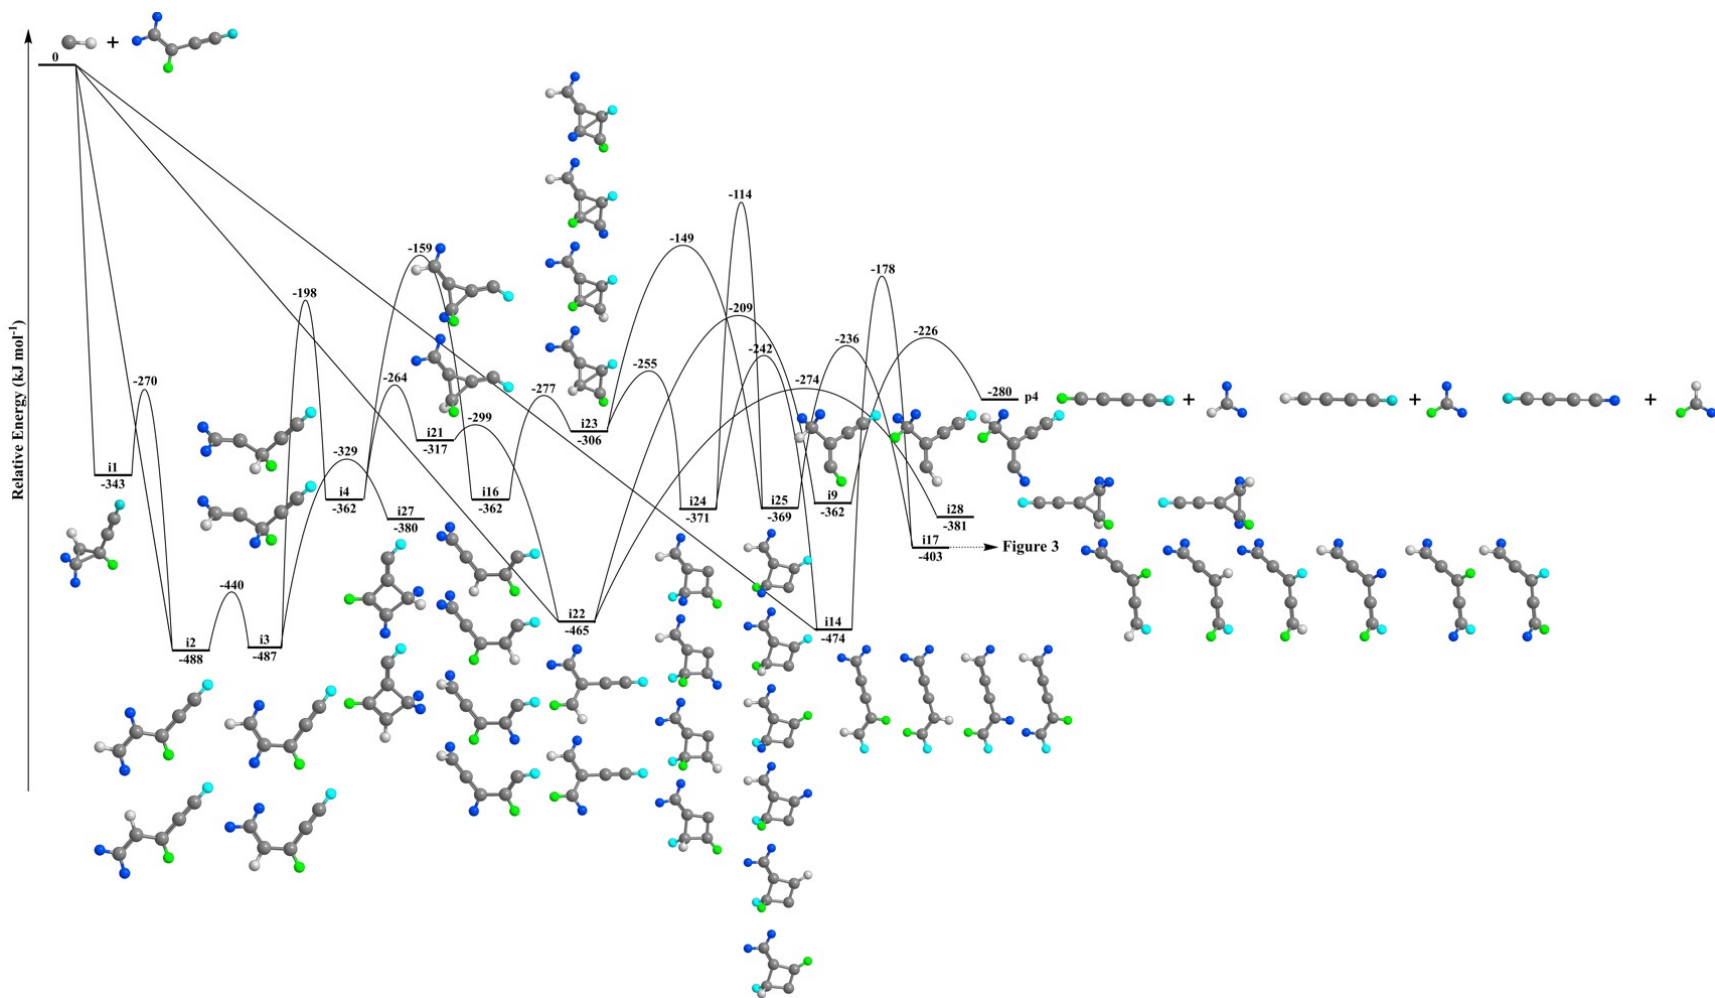

**Figure S6.** Portion of  $\text{C}_5\text{H}_5$  potential energy surface (PES) leading to **p4**. H atoms from methylidyne radical, CH moiety,  $\text{CH}_2$  moiety, and terminal CH moiety of vinylacetylene reactant are highlighted in grey, green, blue, and cyan, respectively.

**Table S1.** For each candidate basis set (BSX), after optimizing each reactant, product, intermediate, and transition state with B3LYP/BSX, the average time per energy gradient, *t*, and minimal root mean square difference between the calculated and benchmark energy, RMSD, is summarized below. Altogether, this comes down to 79 optimized geometries per BSX.

| <b>Basis Set</b>                    | <b>t (s)</b> | <b>RMSD (kJ mol<sup>-1</sup>)</b> |
|-------------------------------------|--------------|-----------------------------------|
| <b>6-311G**<sup>1</sup></b>         | 36.1         | 22.3                              |
| <b>6-311G*<sup>1</sup></b>          | 26.6         | 23.3                              |
| <b>6-31G*<sup>2</sup></b>           | 11.6         | 34.0                              |
| <b>aug-cc-pVDZ<sup>3</sup></b>      | 85.5         | 22.0                              |
| <b>cc-pVDZ<sup>4</sup></b>          | 36.8         | 25.7                              |
| <b>def2-SVP<sup>5</sup></b>         | 20.0         | 38.8                              |
| <b>def2-SVPD<sup>6</sup></b>        | 49.5         | 36.3                              |
| <b>aug-pc-1<sup>7</sup></b>         | 72.6         | 21.2                              |
| <b>pc-1<sup>8</sup></b>             | 15.6         | 24.6                              |
| <b>Sapporo-DZP-2012<sup>9</sup></b> | 37.0         | 27.6                              |



**Table S2.** Optimized Cartesian coordinates (in Å) and vibrational frequencies (in  $\text{cm}^{-1}$ ) for all intermediates, transition states, reactants and products involved in the reaction of the methylidyne radical (CH) with vinylacetylene ( $\text{C}_4\text{H}_4$ ).

### Reactants

#### $\text{C}_4\text{H}_4$

T1 diagnostic: 0.01287890

#### Geometry

|   |           |           |           |
|---|-----------|-----------|-----------|
| C | -1.653366 | 0.376552  | 0.000029  |
| C | -0.639154 | -0.492868 | 0.000038  |
| C | 1.904944  | 0.173030  | -0.000046 |
| C | 0.732151  | -0.115565 | 0.000130  |
| H | -2.675676 | 0.030528  | -0.000564 |
| H | -1.480234 | 1.442355  | 0.000126  |
| H | -0.843266 | -1.556279 | -0.000113 |
| H | 2.931724  | 0.436500  | -0.000353 |

#### Frequencies

|           |           |           |
|-----------|-----------|-----------|
| 221.0783  | 315.4624  | 552.7044  |
| 633.1469  | 663.3548  | 704.1720  |
| 894.6699  | 962.6337  | 1017.0962 |
| 1116.9038 | 1329.0382 | 1455.2260 |
| 1667.0524 | 2172.0727 | 3170.0959 |
| 3178.0262 | 3267.0649 | 3486.6060 |

#### Picture

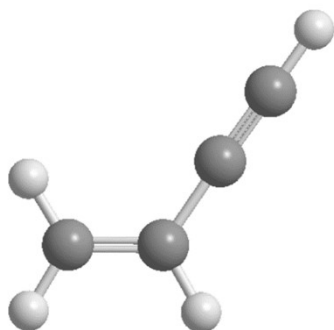

## CH

T1 diagnostic: 0.00907168

### Geometry

|   |          |          |           |
|---|----------|----------|-----------|
| C | 0.000000 | 0.000000 | 0.159796  |
| H | 0.000000 | 0.000000 | -0.958776 |

### Frequencies

2874.2922

### Picture

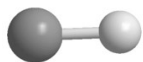

## Intermediates

i10

T1 diagnostic: 0.01880906

### Geometries

|   |           |           |           |
|---|-----------|-----------|-----------|
| C | 2.062004  | 0.336706  | 0.000604  |
| C | 0.996262  | -0.558050 | -0.000230 |
| C | -1.353892 | 0.807367  | 0.000154  |
| C | -0.317932 | -0.196148 | -0.001921 |
| C | -1.720806 | -0.461897 | 0.000989  |
| H | 3.079911  | -0.016279 | 0.000975  |
| H | 1.895038  | 1.403231  | 0.000818  |
| H | 1.206451  | -1.620178 | -0.000271 |
| H | -1.649533 | 1.839321  | -0.000723 |
| H | -2.525679 | -1.173958 | 0.001626  |

### Frequencies

|           |           |           |
|-----------|-----------|-----------|
| 201.0853  | 219.0368  | 329.5754  |
| 513.2457  | 513.7433  | 630.9506  |
| 666.4958  | 770.5616  | 858.9631  |
| 889.7300  | 913.6495  | 978.6218  |
| 1067.5311 | 1107.2495 | 1202.5576 |
| 1392.0585 | 1513.3431 | 1546.8669 |
| 1746.2568 | 3170.7956 | 3175.0781 |
| 3265.6183 | 3274.2721 | 3310.8059 |

### Picture

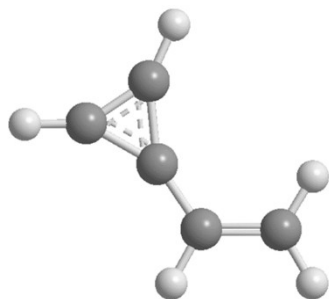

**il**

T1 diagnostic: 0.01398030

Geometries

|   |           |           |           |
|---|-----------|-----------|-----------|
| C | 1.410336  | -0.608310 | -0.315073 |
| C | 0.304112  | -0.023847 | 0.592990  |
| C | -2.212064 | -0.033271 | -0.212518 |
| C | -1.065706 | -0.031641 | 0.164548  |
| C | 1.288391  | 0.829550  | -0.104048 |
| H | 2.181712  | -1.156810 | 0.209522  |
| H | 1.124513  | -1.027814 | -1.270904 |
| H | 0.458435  | -0.199432 | 1.650599  |
| H | -3.221021 | -0.034187 | -0.536731 |
| H | 1.105950  | 1.623358  | -0.807877 |

Frequencies

|           |           |           |
|-----------|-----------|-----------|
| 193.9006  | 208.1536  | 482.2092  |
| 497.4170  | 617.6730  | 664.1191  |
| 668.5362  | 790.3703  | 852.5941  |
| 872.5007  | 957.4549  | 1046.5876 |
| 1084.2441 | 1088.3635 | 1130.7767 |
| 1247.5616 | 1367.0306 | 1475.7203 |
| 2179.6452 | 3125.0301 | 3147.3425 |
| 3207.4990 | 3247.1506 | 3489.3898 |

Picture

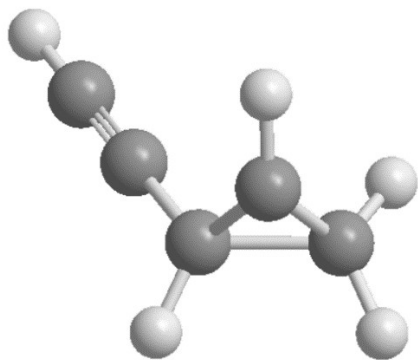

i2

T1 diagnostic: 0.01812062

### Geometries

|   |           |           |           |
|---|-----------|-----------|-----------|
| C | 1.041444  | -0.398010 | -0.001237 |
| C | -0.025894 | 0.515580  | -0.001331 |
| C | -2.535065 | -0.195454 | 0.001292  |
| C | -1.366624 | 0.129872  | -0.000974 |
| C | 2.351548  | -0.032592 | 0.001302  |
| H | 2.640294  | 1.008941  | 0.003865  |
| H | 0.789779  | -1.451028 | -0.003063 |
| H | 0.194371  | 1.575611  | -0.000836 |
| H | -3.555887 | -0.480699 | 0.003702  |
| H | 3.138983  | -0.769198 | 0.002023  |

### Frequencies

|           |           |           |
|-----------|-----------|-----------|
| 154.3067  | 169.1536  | 395.7109  |
| 428.7151  | 554.4461  | 569.2422  |
| 596.4388  | 661.2892  | 773.3620  |
| 878.8890  | 930.7404  | 1025.1386 |
| 1095.2351 | 1189.4992 | 1304.5843 |
| 1341.1267 | 1470.6929 | 1552.5700 |
| 2127.0192 | 3167.1838 | 3174.8645 |
| 3184.9369 | 3267.8088 | 3486.4777 |

### Picture

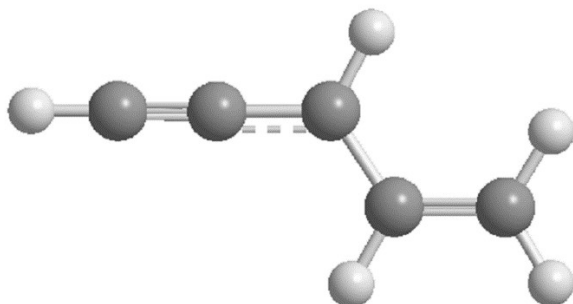

**i4**

T1 diagnostic: 0.01486247

### Geometries

|   |           |           |           |
|---|-----------|-----------|-----------|
| C | -2.355916 | -0.511878 | 0.040213  |
| C | -1.309334 | 0.082814  | 0.027205  |
| C | -0.039591 | 0.808362  | 0.012231  |
| H | -0.124953 | 1.665671  | -0.659303 |
| C | 1.108422  | -0.030333 | -0.394444 |
| C | 2.230999  | -0.447341 | 0.126473  |
| H | 2.508527  | -0.184667 | 1.147023  |
| H | 2.926783  | -1.068090 | -0.421869 |
| H | -3.275324 | -1.038889 | 0.051628  |
| H | 0.157485  | 1.216222  | 1.012459  |

### Frequencies

|           |           |           |
|-----------|-----------|-----------|
| 90.3222   | 198.7730  | 319.2872  |
| 327.3683  | 438.5808  | 584.0483  |
| 656.2593  | 667.7956  | 867.2081  |
| 906.5111  | 920.0349  | 983.1089  |
| 1063.0492 | 1232.0665 | 1321.7958 |
| 1426.7087 | 1453.4784 | 1758.3455 |
| 2195.1683 | 2987.0606 | 3062.6438 |
| 3072.4768 | 3195.7392 | 3491.5062 |

### Picture

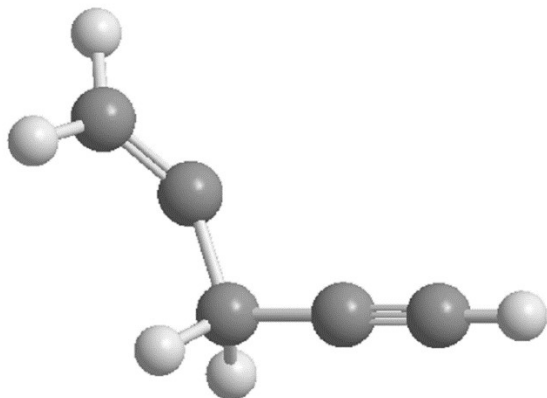

i21

T1 diagnostic: 0.01797891

### Geometries

|   |           |           |           |
|---|-----------|-----------|-----------|
| C | 1.860919  | -0.788526 | 0.000102  |
| H | 2.921414  | -0.615640 | 0.000759  |
| C | 0.763146  | -0.118639 | -0.000464 |
| C | -0.654355 | 0.001361  | -0.000658 |
| C | -1.832491 | -0.596388 | 0.000151  |
| H | -2.746907 | -0.020904 | 0.000902  |
| H | -1.908132 | -1.673755 | -0.000199 |
| C | 0.097942  | 1.272110  | 0.000365  |
| H | 0.160996  | 1.844759  | 0.917425  |
| H | 0.161666  | 1.846031  | -0.915853 |

### Frequencies

|           |           |           |
|-----------|-----------|-----------|
| 233.0233  | 246.5765  | 343.9044  |
| 417.6255  | 630.2799  | 646.6875  |
| 737.1481  | 774.8153  | 883.9334  |
| 930.6503  | 945.1051  | 947.1408  |
| 1030.7666 | 1035.5844 | 1141.1538 |
| 1442.2575 | 1470.7533 | 1709.5588 |
| 1934.5083 | 3116.4464 | 3162.9044 |
| 3204.2654 | 3252.4972 | 3286.3522 |

### Picture

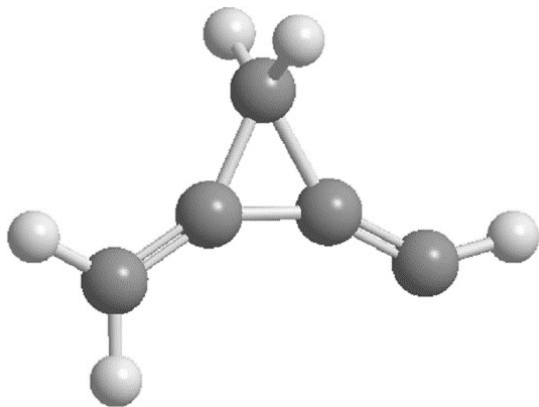

i22

T1 diagnostic: 0.01209839

### Geometries

|   |           |           |           |
|---|-----------|-----------|-----------|
| C | -2.173060 | -0.000065 | -0.000552 |
| C | -0.967888 | -0.000668 | 0.000535  |
| C | 0.470554  | -0.000012 | 0.000162  |
| C | 1.135551  | 1.216482  | 0.000004  |
| H | 0.595325  | 2.148380  | 0.000151  |
| C | 1.136614  | -1.215932 | -0.000007 |
| H | 0.597195  | -2.148297 | 0.000125  |
| H | 2.215545  | -1.242070 | -0.000222 |
| H | -3.233150 | -0.000407 | -0.000689 |
| H | 2.214458  | 1.243568  | -0.000214 |

### Frequencies

|           |           |           |
|-----------|-----------|-----------|
| 189.3743  | 265.6040  | 404.8724  |
| 536.5225  | 557.7664  | 564.6442  |
| 633.4224  | 658.8235  | 672.5129  |
| 790.3074  | 802.8796  | 818.9037  |
| 988.2965  | 1054.4041 | 1276.1834 |
| 1385.9203 | 1489.1667 | 1539.5144 |
| 2210.0346 | 3175.9128 | 3182.6758 |
| 3286.4509 | 3287.8588 | 3488.4291 |

### Picture

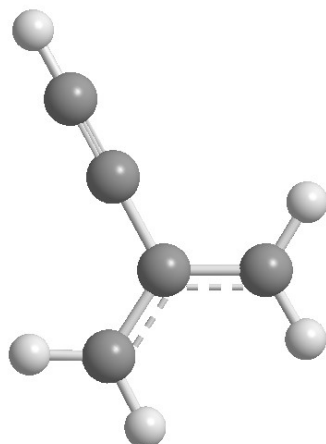



i6

T1 diagnostic: 0.01472486

### Geometries

|   |           |           |           |
|---|-----------|-----------|-----------|
| C | -2.316815 | -0.415331 | -0.126125 |
| C | -1.246005 | 0.132285  | -0.054571 |
| C | 0.062794  | 0.770375  | 0.046043  |
| H | 0.316231  | 1.250734  | -0.898377 |
| C | 1.151030  | -0.223870 | 0.429430  |
| C | 2.228501  | -0.438903 | -0.273184 |
| H | 2.668135  | -0.092664 | -1.192994 |
| H | -3.260209 | -0.893405 | -0.194897 |
| H | 0.019670  | 1.555673  | 0.804102  |
| H | 0.979142  | -0.767669 | 1.352608  |

### Frequencies

|           |           |           |
|-----------|-----------|-----------|
| 90.7223   | 189.0884  | 332.3631  |
| 372.5397  | 488.5946  | 651.9195  |
| 663.4632  | 686.2867  | 825.9810  |
| 856.0706  | 948.4613  | 974.1242  |
| 1037.5665 | 1215.4601 | 1281.7145 |
| 1324.9854 | 1476.9266 | 1691.2622 |
| 2187.7369 | 3049.0484 | 3098.9113 |
| 3146.1141 | 3263.7152 | 3490.2772 |

### Picture

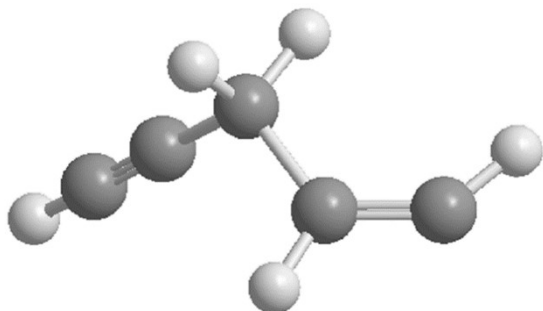

i3

T1 diagnostic: 0.01782912

### Geometries

|   |           |           |           |
|---|-----------|-----------|-----------|
| C | 1.309004  | -0.404836 | -0.000060 |
| C | 0.014583  | -0.953355 | 0.000125  |
| C | -1.155316 | -0.185304 | 0.000009  |
| C | 1.600578  | 0.925386  | 0.000030  |
| C | -2.169963 | 0.476922  | -0.000038 |
| H | 2.127466  | -1.113112 | -0.000197 |
| H | -0.097829 | -2.028106 | -0.000148 |
| H | 2.622361  | 1.269916  | -0.000094 |
| H | 0.815347  | 1.666846  | 0.000132  |
| H | -3.060656 | 1.051584  | -0.000092 |

### Frequencies

|           |           |           |
|-----------|-----------|-----------|
| 157.4819  | 228.7453  | 382.3362  |
| 443.0170  | 567.2678  | 589.2083  |
| 650.6183  | 662.7101  | 736.4461  |
| 881.9146  | 948.6996  | 1012.4735 |
| 1043.9286 | 1152.7749 | 1256.3111 |
| 1418.7016 | 1443.8219 | 1557.6593 |
| 2144.2080 | 3173.1862 | 3180.2809 |
| 3202.5596 | 3273.0008 | 3486.8484 |

### Picture

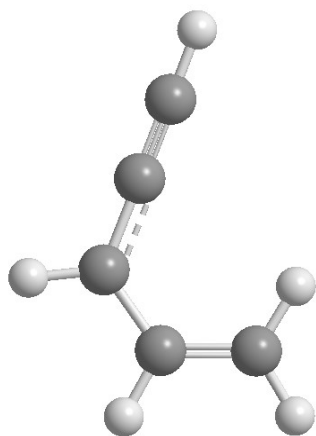



i7

T1 diagnostic: 0.01937847

### Geometries

|   |           |           |           |
|---|-----------|-----------|-----------|
| C | 2.686937  | -0.153442 | 0.000001  |
| C | 1.473038  | -0.004317 | 0.000002  |
| C | 0.144357  | 0.072001  | -0.000003 |
| C | -1.084627 | 0.505840  | 0.000001  |
| C | -2.315455 | -0.356775 | 0.000000  |
| H | -2.057095 | -1.411884 | 0.000019  |
| H | -2.927248 | -0.144638 | 0.877792  |
| H | -2.927231 | -0.144664 | -0.877810 |
| H | 3.741098  | -0.261820 | -0.000006 |
| H | -1.255025 | 1.583166  | 0.000001  |

### Frequencies

|           |           |           |
|-----------|-----------|-----------|
| 60.5662   | 149.5644  | 218.7460  |
| 387.4329  | 431.8920  | 448.7173  |
| 509.9224  | 649.3925  | 748.3296  |
| 792.9628  | 1037.6026 | 1066.7135 |
| 1104.2129 | 1324.1908 | 1412.8147 |
| 1495.4511 | 1500.1806 | 1858.4444 |
| 2130.7973 | 3046.4590 | 3069.4163 |
| 3101.1747 | 3150.9075 | 3487.0435 |

### Picture

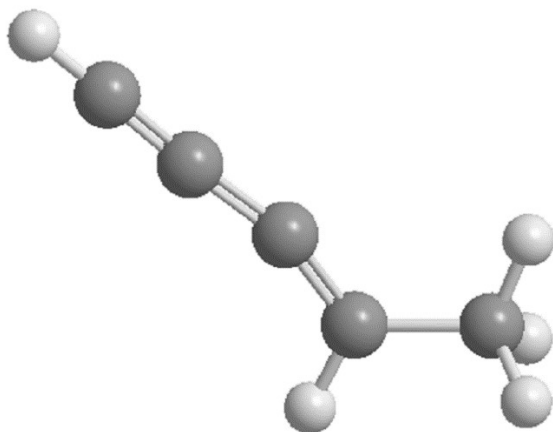

i15

T1 diagnostic: 0.01393031

### Geometries

|   |          |           |           |           |
|---|----------|-----------|-----------|-----------|
| C | 0.000000 | -2.470525 | 0.159789  | -0.000050 |
| H | 0.000000 | -2.766312 | 0.790840  | -0.837576 |
| H | 0.000000 | -3.009495 | -0.783218 | -0.081483 |
| C | 0.000000 | -1.031695 | -0.062381 | -0.000054 |
| C | 0.000000 | 0.163467  | -0.241726 | 0.000139  |
| C | 0.000000 | 1.573721  | -0.471170 | -0.000037 |
| H | 0.000000 | 1.904560  | -1.505327 | -0.000036 |
| C | 0.000000 | 2.464882  | 0.494664  | -0.000033 |
| H | 0.000000 | 2.460060  | 1.571436  | 0.000081  |
| H | 0.000000 | -2.787912 | 0.651208  | 0.919227  |

### Frequencies

|           |           |           |
|-----------|-----------|-----------|
| 22.7792   | 137.3359  | 194.0087  |
| 311.8484  | 390.0079  | 496.2517  |
| 709.1058  | 720.2759  | 893.1096  |
| 929.4517  | 1060.3831 | 1063.0308 |
| 1184.0689 | 1279.9880 | 1425.6824 |
| 1492.9211 | 1493.2019 | 1686.0654 |
| 2325.9972 | 3051.6946 | 3115.1858 |
| 3119.2306 | 3133.2837 | 3264.3446 |

### Picture

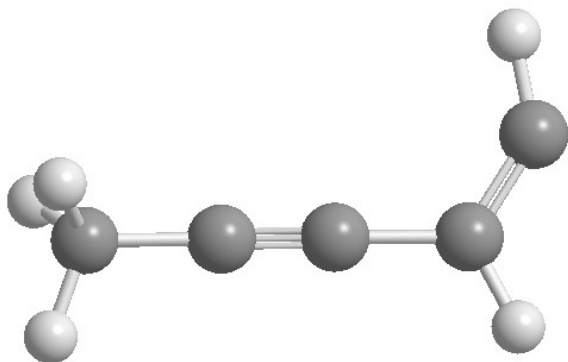

i18

T1 diagnostic: 0.01815963

### Geometries

|   |           |           |           |
|---|-----------|-----------|-----------|
| C | 2.597689  | -0.037579 | -0.000050 |
| H | 2.967680  | -0.538924 | 0.894476  |
| H | 3.027604  | 0.964877  | -0.026021 |
| C | 1.148068  | 0.010254  | 0.000186  |
| C | -0.076534 | 0.040959  | -0.000192 |
| C | -1.401586 | 0.162762  | -0.000073 |
| C | -2.680561 | -0.084728 | 0.000044  |
| H | -3.418167 | 0.709973  | 0.000180  |
| H | 2.966520  | -0.584223 | -0.868175 |
| H | -3.066085 | -1.101705 | 0.000050  |

### Frequencies

|           |           |           |
|-----------|-----------|-----------|
| 16.8846   | 78.3748   | 151.9823  |
| 178.9219  | 346.2929  | 396.1145  |
| 564.3272  | 679.4292  | 902.1574  |
| 985.6691  | 1044.3594 | 1052.8283 |
| 1144.1149 | 1421.3077 | 1454.9988 |
| 1481.6379 | 1487.2493 | 1891.5507 |
| 2216.4571 | 3039.3123 | 3085.5509 |
| 3098.9292 | 3110.6229 | 3162.3063 |

### Picture

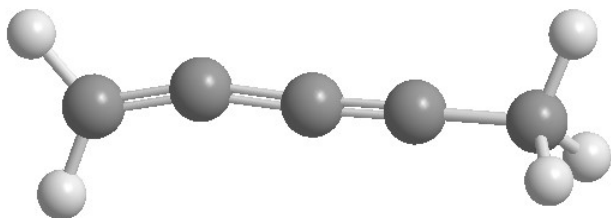

i8

T1 diagnostic: 0.01726084

### Geometries

|   |           |           |           |
|---|-----------|-----------|-----------|
| C | 2.015311  | -0.633227 | 0.000790  |
| C | 0.905680  | 0.031571  | -0.000532 |
| C | -0.558365 | 0.157643  | -0.000414 |
| C | 0.143638  | 1.265853  | 0.000028  |
| C | -1.844125 | -0.558815 | 0.000162  |
| H | 2.363208  | -1.647022 | -0.001910 |
| H | 0.168300  | 2.341112  | 0.000503  |
| H | -1.910020 | -1.203270 | -0.876308 |
| H | -1.910056 | -1.201292 | 0.878102  |
| H | -2.684260 | 0.132323  | -0.000595 |

### Frequencies

|           |           |           |
|-----------|-----------|-----------|
| 139.6456  | 205.7844  | 258.8926  |
| 434.9807  | 445.1756  | 513.2787  |
| 656.0053  | 757.7890  | 783.7415  |
| 884.1153  | 980.9936  | 1053.9972 |
| 1055.9956 | 1137.9951 | 1413.0689 |
| 1488.0153 | 1490.4315 | 1660.4093 |
| 1860.1198 | 3053.4198 | 3116.2460 |
| 3138.9860 | 3265.9098 | 3307.8085 |

### Picture

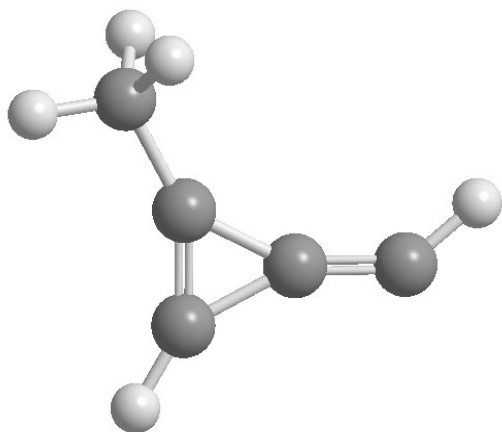

i9

T1 diagnostic: 0.01412078

### Geometries

|   |           |           |           |
|---|-----------|-----------|-----------|
| C | 2.143105  | -0.219212 | -0.000001 |
| C | 0.954686  | -0.020812 | 0.000001  |
| C | -0.463533 | 0.190183  | -0.000004 |
| C | -0.938721 | 1.423197  | -0.000001 |
| H | -0.539844 | 2.426712  | 0.000007  |
| C | -1.352965 | -1.037835 | 0.000001  |
| H | -2.404243 | -0.749174 | -0.000048 |
| H | -1.151629 | -1.651559 | -0.882383 |
| H | -1.151694 | -1.651495 | 0.882440  |
| H | 3.191978  | -0.387612 | 0.000002  |

### Frequencies

|           |           |           |
|-----------|-----------|-----------|
| 171.6784  | 178.1686  | 270.2974  |
| 368.4727  | 531.5220  | 538.6140  |
| 643.3850  | 678.0818  | 691.6875  |
| 770.8310  | 852.2368  | 1028.3141 |
| 1052.8231 | 1194.0462 | 1402.4788 |
| 1480.5736 | 1482.2633 | 1641.3951 |
| 2190.8530 | 3030.7571 | 3087.9679 |
| 3123.9399 | 3240.7376 | 3476.1282 |

### Picture

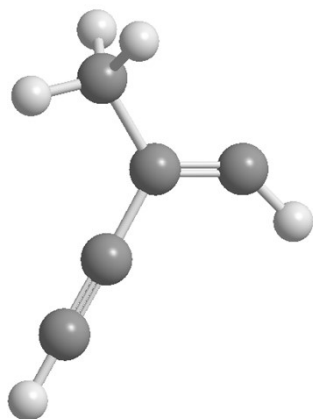



i24

T1 diagnostic: 0.01556265

### Geometries

|   |           |           |           |
|---|-----------|-----------|-----------|
| C | -1.884228 | -0.045426 | -0.000051 |
| H | -2.414243 | 0.895562  | 0.000074  |
| C | -0.561107 | -0.083409 | -0.000101 |
| C | 0.570546  | 0.967510  | 0.000195  |
| H | 0.599503  | 1.581689  | 0.899593  |
| C | 1.539295  | -0.226098 | -0.000096 |
| C | 0.513648  | -1.080263 | -0.000076 |
| H | -2.466277 | -0.955118 | -0.000145 |
| H | 0.599586  | 1.582328  | -0.898748 |
| H | 2.612511  | -0.298345 | -0.000002 |

### Frequencies

|           |           |           |
|-----------|-----------|-----------|
| 217.4237  | 347.5997  | 526.1883  |
| 718.2350  | 723.6699  | 789.0217  |
| 846.2966  | 897.1456  | 911.6564  |
| 961.6099  | 986.0730  | 1096.3229 |
| 1109.2509 | 1189.8055 | 1233.3566 |
| 1448.5542 | 1471.7341 | 1615.2772 |
| 1764.7891 | 3057.4322 | 3123.4062 |
| 3168.3076 | 3255.8330 | 3270.0499 |

### Picture

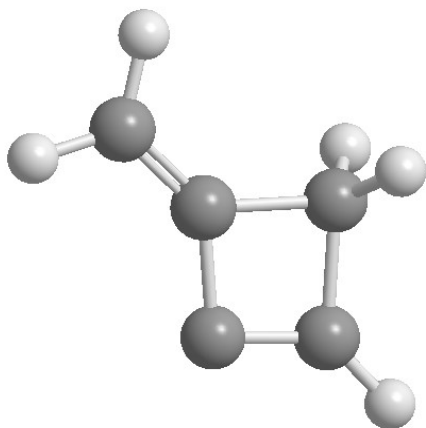

i14

T1 diagnostic: 0.02096690

### Geometries

|   |           |           |           |
|---|-----------|-----------|-----------|
| C | -2.565278 | 0.177938  | -0.000114 |
| H | -2.959343 | 1.182951  | 0.000036  |
| H | -3.264706 | -0.644358 | -0.000283 |
| C | -1.230748 | -0.045076 | -0.000056 |
| C | -0.013963 | -0.238563 | 0.000004  |
| C | 1.362824  | -0.487708 | 0.000114  |
| H | 1.666950  | -1.527923 | 0.000328  |
| C | 2.307045  | 0.470212  | 0.000035  |
| H | 3.354539  | 0.211491  | 0.000163  |
| H | 2.043281  | 1.517021  | -0.000140 |

### Frequencies

|           |           |           |
|-----------|-----------|-----------|
| 141.9540  | 178.9855  | 285.4053  |
| 328.9317  | 447.5005  | 534.8473  |
| 670.4722  | 740.4732  | 761.2372  |
| 939.4596  | 1010.5888 | 1041.3602 |
| 1074.9957 | 1305.0046 | 1319.2864 |
| 1452.2257 | 1499.7240 | 1612.6632 |
| 2035.6161 | 3162.5869 | 3165.4798 |
| 3175.6041 | 3256.6314 | 3271.3957 |

### Picture

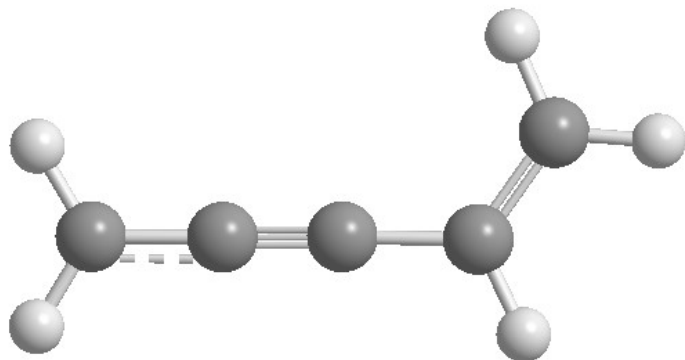

i25

T1 diagnostic: 0.01510417

### Geometries

|   |           |           |           |
|---|-----------|-----------|-----------|
| C | -1.785190 | 0.005980  | -0.000160 |
| H | -2.364146 | 0.917815  | -0.000093 |
| C | -0.456843 | 0.036638  | -0.000014 |
| C | 0.613430  | -1.072679 | 0.000278  |
| H | 0.645649  | -1.689991 | -0.894173 |
| C | 1.523036  | 0.144762  | -0.000679 |
| C | 0.578449  | 1.090180  | 0.000385  |
| H | 0.551856  | 2.165954  | 0.000408  |
| H | -2.316891 | -0.933757 | -0.000199 |
| H | 0.646242  | -1.689306 | 0.895192  |

### Frequencies

|           |           |           |
|-----------|-----------|-----------|
| 201.7711  | 348.3160  | 462.0991  |
| 692.5683  | 724.4030  | 833.8807  |
| 848.0185  | 889.2603  | 918.5022  |
| 1007.9113 | 1008.5534 | 1068.6897 |
| 1138.8390 | 1160.3458 | 1223.2476 |
| 1452.2205 | 1482.3571 | 1606.8241 |
| 1738.3252 | 3091.9829 | 3147.3859 |
| 3165.8020 | 3255.6969 | 3264.2808 |

### Picture

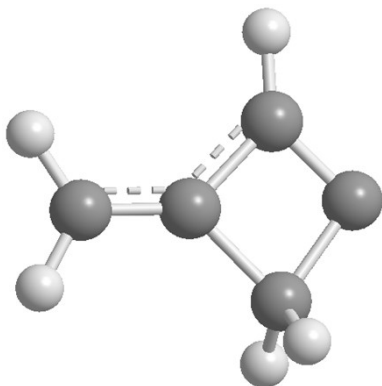

i17

T1 diagnostic: 0.01312925

### Geometries

|   |           |           |           |
|---|-----------|-----------|-----------|
| C | -2.365318 | -0.439535 | -0.000006 |
| H | -2.877101 | -0.696978 | 0.922691  |
| C | -1.204111 | 0.138946  | 0.000161  |
| C | 0.000000  | 0.758593  | -0.000215 |
| C | 1.204093  | 0.138906  | 0.000405  |
| C | 2.365326  | -0.439521 | -0.000074 |
| H | 2.877328  | -0.697039 | 0.922480  |
| H | 2.876220  | -0.697635 | -0.923089 |
| H | -2.876407 | -0.697738 | -0.922885 |
| H | 0.000015  | 1.845053  | -0.000823 |

### Frequencies

|           |           |           |
|-----------|-----------|-----------|
| 110.4076  | 133.2468  | 155.3784  |
| 351.5282  | 452.1887  | 506.8807  |
| 613.7116  | 888.3018  | 901.5547  |
| 903.2749  | 955.8266  | 983.0701  |
| 987.0645  | 1034.7715 | 1334.4953 |
| 1451.8838 | 1466.1106 | 1862.2402 |
| 1939.2981 | 3088.8227 | 3092.9366 |
| 3130.6487 | 3152.2295 | 3152.2879 |

### Picture

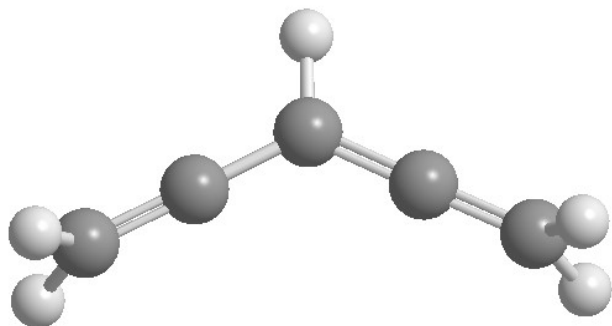

**i16**

T1 diagnostic: 0.01483925

Geometries

|   |           |           |           |
|---|-----------|-----------|-----------|
| C | -2.151457 | -0.464890 | 0.000116  |
| H | -2.628112 | -0.759543 | 0.925929  |
| C | -1.042663 | 0.215584  | -0.000038 |
| C | 0.074510  | 0.896763  | -0.000257 |
| C | 1.429106  | 0.314440  | 0.000234  |
| C | 1.748860  | -0.955388 | -0.000162 |
| H | 2.651231  | -1.540061 | 0.000099  |
| H | -2.627806 | -0.760483 | -0.925556 |
| H | 0.013453  | 1.978082  | -0.000836 |
| H | 2.241099  | 1.042949  | 0.001006  |

Frequencies

|           |           |           |
|-----------|-----------|-----------|
| 38.8138   | 148.4728  | 326.4063  |
| 386.7109  | 516.8107  | 633.9158  |
| 688.9846  | 841.7768  | 869.2278  |
| 879.7008  | 911.6468  | 930.4014  |
| 1016.7895 | 1155.9420 | 1283.4100 |
| 1380.1352 | 1486.0567 | 1722.3633 |
| 2054.4825 | 3067.2759 | 3141.7878 |
| 3168.8011 | 3218.0873 | 3279.4311 |

Picture

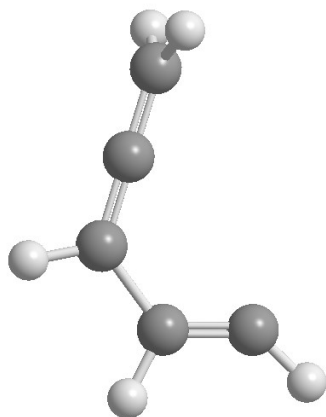

i23

T1 diagnostic: 0.01512980

### Geometries

|   |           |           |           |
|---|-----------|-----------|-----------|
| C | -1.911459 | 0.000001  | 0.171913  |
| H | -2.457279 | -0.927495 | 0.243414  |
| C | -0.596609 | 0.000001  | 0.010946  |
| C | 0.579412  | -0.811731 | -0.265587 |
| H | 0.725722  | -1.479390 | -1.100745 |
| C | 1.588947  | 0.000012  | 0.402430  |
| H | 2.024960  | 0.000005  | 1.390035  |
| C | 0.579402  | 0.811709  | -0.265605 |
| H | 0.725713  | 1.479433  | -1.100710 |
| H | -2.457270 | 0.927501  | 0.243426  |

### Frequencies

|           |           |           |
|-----------|-----------|-----------|
| 219.3869  | 347.6509  | 528.0416  |
| 671.1184  | 708.0398  | 743.8857  |
| 781.0352  | 834.8691  | 850.3024  |
| 889.6473  | 1010.3886 | 1019.6286 |
| 1040.9763 | 1115.7374 | 1165.9742 |
| 1179.8936 | 1321.6088 | 1466.6571 |
| 1802.5892 | 3177.3947 | 3192.7253 |
| 3211.8768 | 3217.4926 | 3268.2096 |

### Picture

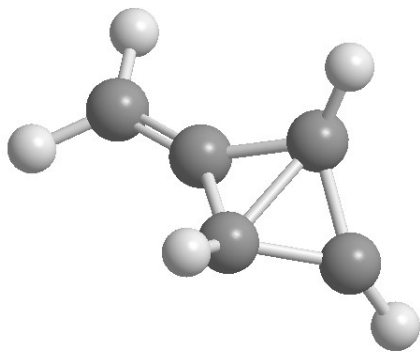

i19

T1 diagnostic: 0.01408456

### Geometries

|   |           |           |           |
|---|-----------|-----------|-----------|
| C | -0.609013 | 0.976400  | 0.000272  |
| C | 0.732834  | 0.916699  | -0.000352 |
| C | 1.179471  | -0.497632 | 0.000435  |
| C | -1.177466 | -0.424298 | -0.000111 |
| C | 0.073044  | -1.231460 | -0.000412 |
| H | -1.216699 | 1.866705  | 0.000044  |
| H | 1.407774  | 1.759121  | -0.000745 |
| H | 2.204970  | -0.827232 | 0.000454  |
| H | -1.795333 | -0.618822 | -0.878637 |
| H | -1.793927 | -0.618026 | 0.879904  |

### Frequencies

|           |           |           |
|-----------|-----------|-----------|
| 310.3126  | 458.5937  | 681.8882  |
| 789.1292  | 805.7976  | 837.3961  |
| 913.8240  | 940.3577  | 955.3404  |
| 967.0270  | 1003.6152 | 1119.5848 |
| 1125.0960 | 1222.4795 | 1255.1360 |
| 1350.5681 | 1423.4338 | 1628.9937 |
| 1659.5505 | 3064.9699 | 3099.7447 |
| 3214.5511 | 3242.0781 | 3249.2337 |

### Picture

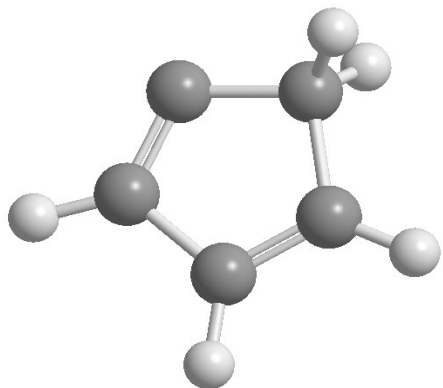

**i11**

T1 diagnostic: 0.01558170

Geometries

|   |           |           |           |
|---|-----------|-----------|-----------|
| C | 2.106215  | 0.190351  | 0.169765  |
| C | 0.999213  | -0.472431 | -0.180157 |
| C | -1.293354 | 0.927015  | -0.219348 |
| C | -0.308920 | 0.104832  | -0.144369 |
| C | -1.812910 | -0.386317 | 0.223708  |
| H | 3.075549  | -0.280005 | 0.103957  |
| H | 2.061826  | 1.211037  | 0.519594  |
| H | 1.064693  | -1.499581 | -0.515981 |
| H | -2.333421 | -1.029878 | -0.477497 |
| H | -2.010112 | -0.582271 | 1.272338  |

Frequencies

|           |           |           |
|-----------|-----------|-----------|
| 73.0422   | 199.6527  | 282.9094  |
| 435.7246  | 639.9907  | 700.0958  |
| 750.9729  | 900.6140  | 960.3645  |
| 996.4950  | 1017.2421 | 1054.8013 |
| 1075.8098 | 1114.1267 | 1327.0105 |
| 1450.2924 | 1514.9786 | 1654.1810 |
| 1874.0093 | 3088.4375 | 3169.3887 |
| 3172.7755 | 3179.2073 | 3265.9112 |

Picture

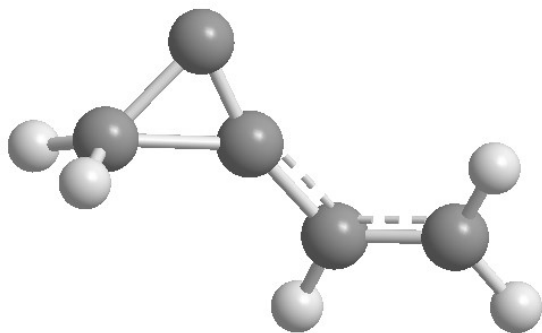



i12

T1 diagnostic: 0.01642391

### Geometries

|   |           |           |           |
|---|-----------|-----------|-----------|
| C | -2.220220 | 0.140812  | -0.000011 |
| C | -0.884711 | -0.472306 | -0.000032 |
| C | 1.508077  | 0.770391  | 0.000183  |
| C | 0.371553  | -0.170354 | 0.000051  |
| C | 1.783164  | -0.509916 | -0.000113 |
| H | -2.799165 | -0.142925 | -0.879732 |
| H | -2.136584 | 1.233927  | -0.000459 |
| H | 1.860405  | 1.785857  | -0.000610 |
| H | 2.526984  | -1.286453 | 0.000123  |
| H | -2.798815 | -0.142172 | 0.880208  |

### Frequencies

|           |           |           |
|-----------|-----------|-----------|
| 129.5649  | 161.7356  | 192.8901  |
| 383.7272  | 468.4123  | 623.2122  |
| 709.1342  | 775.3870  | 872.6424  |
| 951.8836  | 1041.4159 | 1048.0259 |
| 1061.6170 | 1177.4306 | 1407.9964 |
| 1472.8307 | 1499.7177 | 1617.7626 |
| 1872.7404 | 2996.0338 | 3069.6042 |
| 3090.9185 | 3250.0157 | 3294.1066 |

### Picture

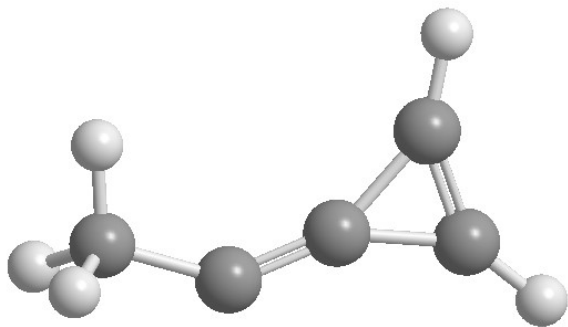

i13

T1 diagnostic: 0.01507129

### Geometries

|   |           |           |           |
|---|-----------|-----------|-----------|
| C | 2.005346  | 0.269606  | -0.194308 |
| C | 0.995164  | -0.512606 | 0.086794  |
| C | -1.248156 | 0.772772  | 0.160261  |
| C | -0.392810 | -0.448171 | 0.498321  |
| C | -1.494197 | -0.289513 | -0.526764 |
| H | 2.955846  | -0.114012 | -0.541772 |
| H | 1.930321  | 1.351667  | -0.085615 |
| H | -1.419888 | 1.809380  | 0.377703  |
| H | -2.036457 | -0.798896 | -1.300313 |
| H | -0.621908 | -1.000660 | 1.404178  |

### Frequencies

|           |           |           |
|-----------|-----------|-----------|
| 86.2085   | 194.7876  | 333.3899  |
| 494.5931  | 575.3843  | 645.1030  |
| 756.5109  | 844.8021  | 895.1246  |
| 900.7020  | 948.6193  | 1005.0511 |
| 1026.3692 | 1057.9347 | 1124.2240 |
| 1367.1673 | 1430.6961 | 1702.3674 |
| 1756.9999 | 3064.7666 | 3113.1674 |
| 3183.6056 | 3271.4564 | 3318.9050 |

### Picture

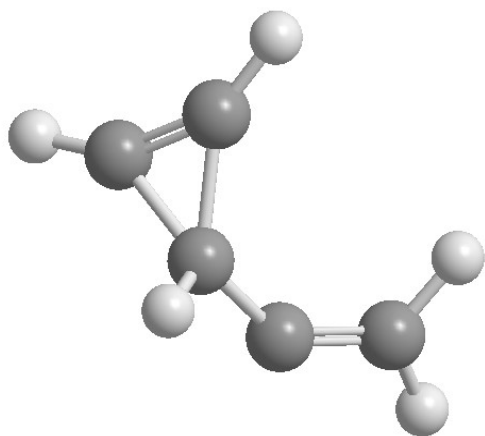

i27

T1 diagnostic: 0.01590340

Geometry

|   |          |           |           |           |
|---|----------|-----------|-----------|-----------|
| H | 0.000000 | -2.772221 | 0.482730  | 0.000008  |
| H | 0.000000 | 0.577167  | -2.111420 | -0.000031 |
| H | 0.000000 | 0.375549  | 1.695812  | 0.892322  |
| H | 0.000000 | 0.375570  | 1.695780  | -0.892372 |
| C | 0.000000 | -0.624112 | -0.104400 | 0.000002  |
| C | 0.000000 | -1.922111 | -0.174188 | 0.000010  |
| C | 0.000000 | 0.522655  | -1.033634 | -0.000015 |
| C | 0.000000 | 0.408996  | 1.072647  | -0.000014 |
| H | 0.000000 | 2.514785  | -0.037208 | 0.000039  |
| C | 0.000000 | 1.436097  | -0.048040 | 0.000022  |

Frequencies

|           |           |           |
|-----------|-----------|-----------|
| 223.9067  | 336.7597  | 490.6766  |
| 657.1877  | 717.4695  | 770.7059  |
| 784.2269  | 875.2396  | 952.4197  |
| 969.8033  | 998.2265  | 1044.3756 |
| 1098.9767 | 1117.9547 | 1208.3090 |
| 1314.6679 | 1477.1348 | 1628.0753 |
| 1756.3134 | 3072.9102 | 3126.4600 |
| 3215.5698 | 3245.3620 | 3289.8652 |

Picture

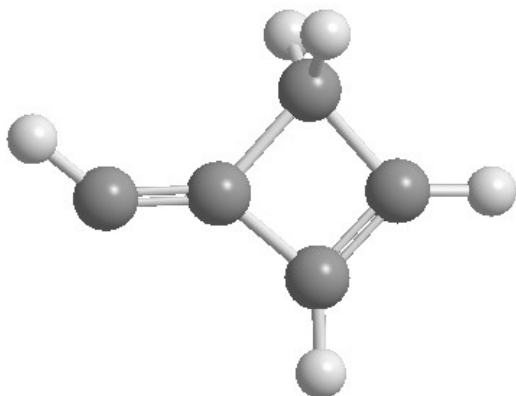

i29

T1 diagnostic: 0.02039656

### Geometry

|   |          |           |           |           |
|---|----------|-----------|-----------|-----------|
| H | 0.000000 | -2.693444 | 0.049576  | -0.039402 |
| H | 0.000000 | -0.346037 | 1.676888  | -0.557880 |
| H | 0.000000 | 2.742113  | -0.401181 | 0.317029  |
| H | 0.000000 | 1.998733  | 0.466841  | -1.141128 |
| C | 0.000000 | -1.626274 | -0.040001 | 0.033388  |
| C | 0.000000 | -0.661788 | -0.903225 | -0.388734 |
| C | 0.000000 | -0.516353 | 0.834418  | 0.109206  |
| C | 0.000000 | 1.875710  | 0.013873  | -0.169811 |
| H | 0.000000 | 0.530847  | -0.524890 | 1.415670  |
| C | 0.000000 | 0.556670  | -0.116271 | 0.416903  |

### Frequencies

|           |           |           |
|-----------|-----------|-----------|
| 188.0048  | 280.7075  | 327.5705  |
| 467.5743  | 586.5467  | 626.9367  |
| 631.4626  | 794.0558  | 884.7181  |
| 958.7631  | 1040.4095 | 1069.3278 |
| 1144.4338 | 1176.6370 | 1250.4205 |
| 1309.6103 | 1399.8898 | 1473.8718 |
| 1494.7964 | 3104.1785 | 3180.6861 |
| 3196.9078 | 3290.2966 | 3296.6291 |

### Picture

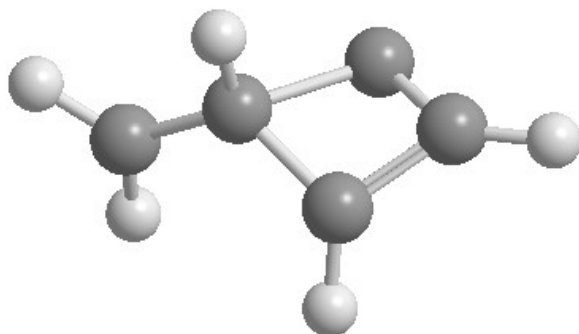

i33

T1 diagnostic: 0.01952476

Geometry

|   |           |           |           |
|---|-----------|-----------|-----------|
| H | -1.574279 | 1.272875  | -0.000049 |
| H | -0.030818 | -1.465777 | -0.000027 |
| H | 2.483877  | -1.200045 | -0.000001 |
| H | 3.192255  | 0.512339  | 0.000025  |
| C | -1.417913 | 0.168280  | -0.000015 |
| C | -2.687663 | -0.146980 | 0.000026  |
| C | -0.110784 | -0.384236 | -0.000014 |
| C | 2.319160  | -0.127663 | 0.000008  |
| H | 0.944443  | 1.473521  | 0.000013  |
| C | 1.061286  | 0.391780  | 0.000001  |

Frequencies

|           |           |           |
|-----------|-----------|-----------|
| 103.1060  | 145.9107  | 258.1364  |
| 304.9455  | 482.2741  | 576.3068  |
| 644.3333  | 768.9608  | 829.5313  |
| 862.4057  | 973.0980  | 995.6774  |
| 1138.4133 | 1211.9761 | 1303.8323 |
| 1335.6480 | 1472.9702 | 1538.8238 |
| 1696.0785 | 2939.3312 | 3157.5293 |
| 3165.7746 | 3201.9477 | 3258.8613 |

Picture

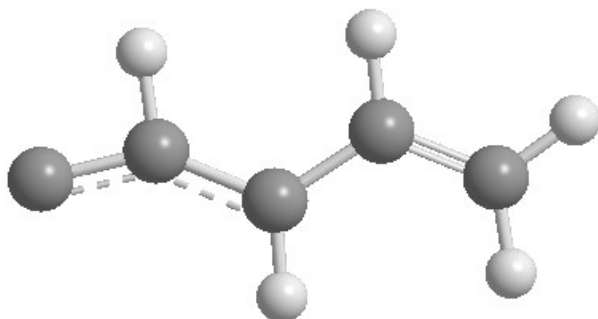

i26

T1 diagnostic: 0.01605158

Geometry

|   |           |           |           |
|---|-----------|-----------|-----------|
| H | 2.021851  | -0.958431 | 1.260126  |
| H | 0.136967  | 1.369398  | 0.614932  |
| H | -2.281526 | 0.931936  | 0.694784  |
| H | -2.970286 | -0.564869 | -0.136072 |
| C | 1.683656  | -0.359676 | 0.441362  |
| C | 1.621234  | 0.286016  | -0.656892 |
| C | 0.313047  | 0.445000  | 0.073421  |
| C | -2.108072 | 0.030202  | 0.123256  |
| H | -0.719133 | -1.230835 | -0.824527 |
| C | -0.874510 | -0.326074 | -0.249353 |

Frequencies

|           |           |           |
|-----------|-----------|-----------|
| 143.4591  | 280.0759  | 310.0291  |
| 473.3748  | 584.9052  | 639.9430  |
| 687.0920  | 854.9390  | 905.6906  |
| 947.7796  | 966.6742  | 1044.7455 |
| 1047.1556 | 1181.1972 | 1321.8820 |
| 1348.7262 | 1467.3870 | 1673.5555 |
| 1742.8729 | 3124.0680 | 3161.4152 |
| 3177.3450 | 3254.8870 | 3357.3772 |

Picture

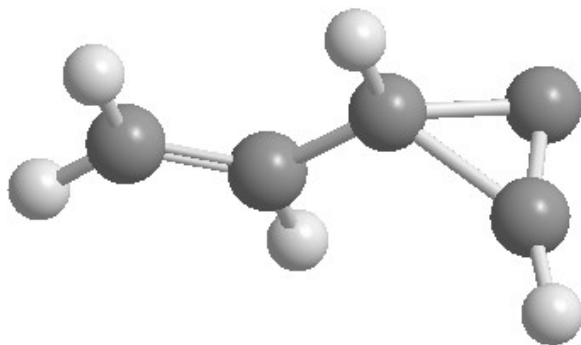

i32

T1 diagnostic: 0.01372530

### Geometry

|   |           |           |           |
|---|-----------|-----------|-----------|
| H | 1.443149  | -1.529066 | 0.000001  |
| H | -2.197857 | -1.461769 | -0.000001 |
| H | -1.518278 | 1.408176  | 0.911454  |
| H | -1.518278 | 1.408176  | -0.911453 |
| C | -0.274602 | -0.220647 | 0.000000  |
| C | 1.141915  | -0.480458 | 0.000001  |
| C | -1.496723 | -0.649699 | -0.000001 |
| C | -1.329188 | 0.847924  | 0.000000  |
| H | 3.141997  | 0.492224  | -0.000001 |
| C | 2.066810  | 0.449924  | -0.000001 |

### Frequencies

|           |           |           |
|-----------|-----------|-----------|
| 149.2120  | 202.4338  | 308.4158  |
| 525.1605  | 655.9806  | 670.4281  |
| 757.6165  | 840.8842  | 869.7077  |
| 958.9046  | 1019.7798 | 1071.5394 |
| 1076.1912 | 1114.2581 | 1205.0829 |
| 1272.1199 | 1532.9189 | 1682.9044 |
| 1924.6329 | 3068.2241 | 3069.9964 |
| 3135.2720 | 3274.1201 | 3298.9405 |

### Picture

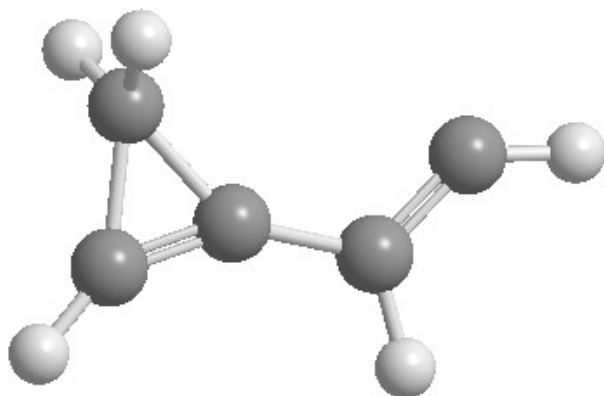

i28

T1 diagnostic: 0.01769493

Geometry

|   |           |           |           |
|---|-----------|-----------|-----------|
| H | -3.457096 | 0.000048  | 0.013110  |
| H | 1.694121  | -1.273952 | 0.920965  |
| H | 1.694070  | 1.273976  | 0.920969  |
| H | 1.732146  | 1.272066  | -0.899126 |
| C | -1.176067 | -0.000029 | -0.004285 |
| C | -2.397580 | 0.000004  | 0.004111  |
| C | 0.173776  | -0.000012 | -0.019797 |
| C | 1.416971  | 0.765555  | 0.005253  |
| H | 1.732183  | -1.272032 | -0.899130 |
| C | 1.416996  | -0.765536 | 0.005254  |

Frequencies

|           |           |           |
|-----------|-----------|-----------|
| 49.2164   | 190.8851  | 383.1250  |
| 461.5615  | 536.7339  | 620.5544  |
| 644.9368  | 751.6876  | 850.3777  |
| 985.2205  | 1006.5026 | 1053.6011 |
| 1055.009  | 1084.9963 | 1164.5598 |
| 1454.9964 | 1466.1715 | 1542.1562 |
| 2038.286  | 3110.1162 | 3110.9370 |
| 3181.0838 | 3193.2829 | 3485.2632 |

Picture

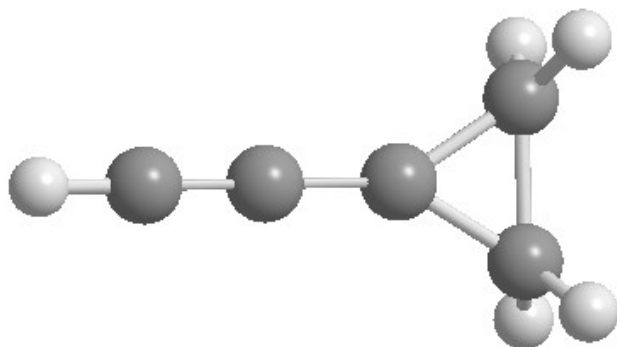



i30

T1 diagnostic: 0.02168264

Geometry

|   |           |           |           |
|---|-----------|-----------|-----------|
| C | -0.293911 | 0.103910  | -0.000473 |
| C | 1.020068  | 0.037415  | 0.000197  |
| C | -1.474535 | 0.766613  | -0.001469 |
| C | -1.581949 | -0.707610 | 0.000451  |
| C | 2.319274  | -0.047896 | 0.000135  |
| H | -1.989273 | 1.706888  | 0.004778  |
| H | -1.857623 | -1.228641 | -0.911816 |
| H | -1.857583 | -1.226809 | 0.913817  |
| H | 2.885437  | -0.082148 | 0.924027  |
| H | 2.885354  | -0.083883 | -0.923862 |

Frequencies

|           |           |           |
|-----------|-----------|-----------|
| 173.6826  | 188.6445  | 220.4640  |
| 406.0061  | 498.7280  | 538.7845  |
| 663.6454  | 874.3734  | 943.1506  |
| 974.0768  | 999.0438  | 1011.3770 |
| 1034.2756 | 1064.9970 | 1110.4003 |
| 1402.9747 | 1491.5227 | 1531.7922 |
| 1940.2909 | 3074.7157 | 3114.6130 |
| 3146.5491 | 3183.9775 | 3301.9843 |

Picture

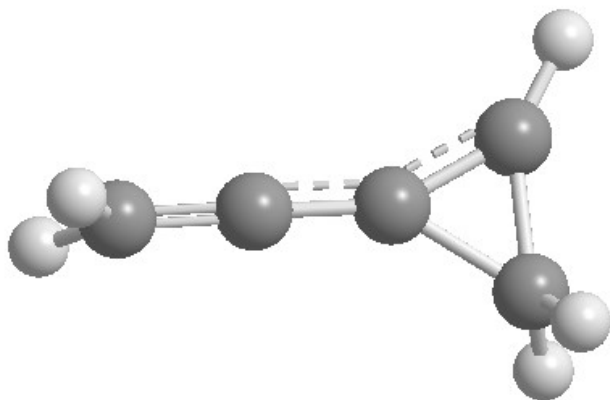

**i31**

T1 diagnostic: 0.01787859

Geometry

|   |           |           |           |
|---|-----------|-----------|-----------|
| C | 1.630184  | 0.304383  | 0.222682  |
| C | 1.714873  | -0.842164 | -0.405268 |
| C | 0.217867  | 0.595993  | -0.033119 |
| C | -2.131525 | -0.032425 | -0.103395 |
| C | -0.836595 | -0.273895 | 0.262531  |
| H | 2.357382  | 1.009466  | 0.595259  |
| H | -0.005611 | 1.508105  | -0.577103 |
| H | -2.395412 | 0.845100  | -0.675938 |
| H | -2.925118 | -0.708805 | 0.170619  |
| H | -0.600067 | -1.165215 | 0.826576  |

Frequencies

|           |           |           |
|-----------|-----------|-----------|
| 152.5331  | 202.2818  | 284.3599  |
| 309.2266  | 522.8831  | 580.1511  |
| 704.8367  | 814.8298  | 877.0048  |
| 936.7041  | 1017.3396 | 1035.3048 |
| 1146.5421 | 1210.5333 | 1297.8422 |
| 1301.1542 | 1441.7991 | 1538.0056 |
| 1630.0368 | 3145.8426 | 3170.8843 |
| 3202.2841 | 3215.4252 | 3272.5307 |

Picture

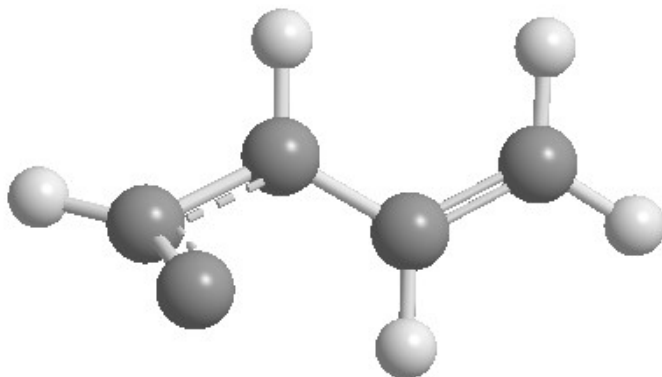

## PRODUCTS

p1

T1 diagnostic: 0.01355370

### Geometries

|   |           |           |           |
|---|-----------|-----------|-----------|
| C | 2.379481  | -0.465525 | 0.000103  |
| C | 1.301463  | 0.077775  | 0.000275  |
| C | 0.052925  | 0.760178  | -0.000127 |
| C | -1.109886 | 0.150466  | -0.000070 |
| C | -2.268191 | -0.439307 | 0.000021  |
| H | -2.765013 | -0.696369 | -0.926142 |
| H | -2.765285 | -0.695561 | 0.926262  |
| H | 3.320228  | -0.953811 | -0.000944 |
| H | 0.075322  | 1.844213  | -0.000383 |

### Frequencies

|           |           |           |
|-----------|-----------|-----------|
| 138.2842  | 296.2742  | 345.8787  |
| 353.5545  | 603.2085  | 613.4659  |
| 638.8172  | 671.4137  | 885.7588  |
| 888.9620  | 952.9534  | 1011.1392 |
| 1138.0006 | 1356.3913 | 1474.2810 |
| 2034.7922 | 2175.4317 | 3144.8882 |
| 3154.2597 | 3223.0162 | 3488.4259 |

### Picture

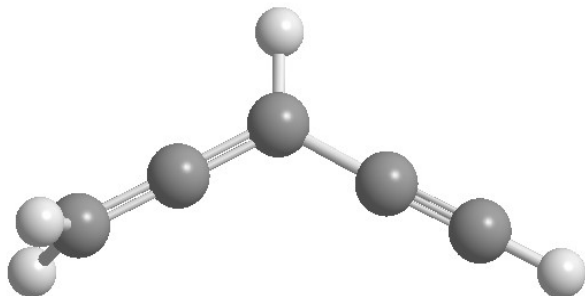

**p2**

T1 diagnostic: 0.01292315

Geometries

|   |           |           |           |
|---|-----------|-----------|-----------|
| C | -2.233165 | -0.577439 | -0.000072 |
| C | -1.221477 | 0.074205  | -0.000088 |
| C | 1.221758  | 0.074691  | -0.000001 |
| C | 2.233002  | -0.577642 | -0.000023 |
| H | 3.120217  | -1.157452 | 0.000107  |
| C | -0.000018 | 0.880415  | 0.000044  |
| H | -0.000110 | 1.534641  | -0.874186 |
| H | -3.120537 | -1.157010 | 0.000506  |
| H | -0.000171 | 1.534450  | 0.874417  |

Frequencies

|           |           |           |
|-----------|-----------|-----------|
| 135.1590  | 307.4838  | 326.6490  |
| 331.7157  | 563.1229  | 658.2849  |
| 660.2572  | 671.1304  | 673.0668  |
| 907.6602  | 943.0214  | 1002.5579 |
| 1251.5819 | 1346.4305 | 1470.5450 |
| 2196.6230 | 2199.1460 | 3049.8726 |
| 3080.3336 | 3490.0996 | 3491.0645 |

Picture

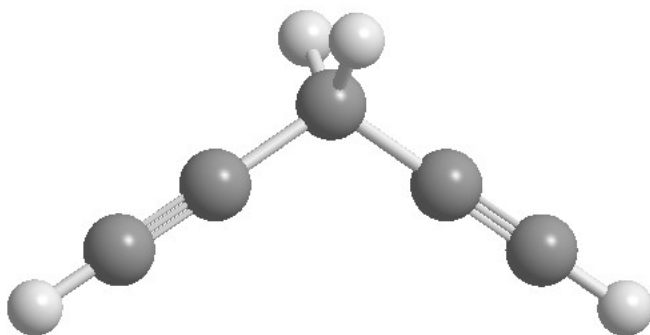

p3

T1 diagnostic: 0.01319528

Geometries

|   |           |           |           |
|---|-----------|-----------|-----------|
| C | -2.514000 | -0.000100 | 0.000069  |
| H | -2.899817 | -0.988530 | 0.247379  |
| C | -1.060794 | 0.000532  | -0.000323 |
| C | 0.151289  | -0.000326 | 0.000311  |
| C | 1.515924  | 0.000098  | -0.000309 |
| C | 2.726678  | -0.000092 | 0.000181  |
| H | -2.900594 | 0.707891  | 0.732377  |
| H | 3.786744  | 0.000252  | -0.000104 |
| H | -2.900914 | 0.279711  | -0.979224 |

Frequencies

|           |           |           |
|-----------|-----------|-----------|
| 145.6398  | 145.9198  | 337.6871  |
| 337.8996  | 516.2573  | 516.2733  |
| 636.0173  | 636.0220  | 676.8863  |
| 1057.8020 | 1058.1087 | 1179.5233 |
| 1424.1481 | 1489.0302 | 1489.1690 |
| 2126.5616 | 2311.4369 | 3052.1929 |
| 3119.3770 | 3119.4503 | 3485.0396 |

Picture

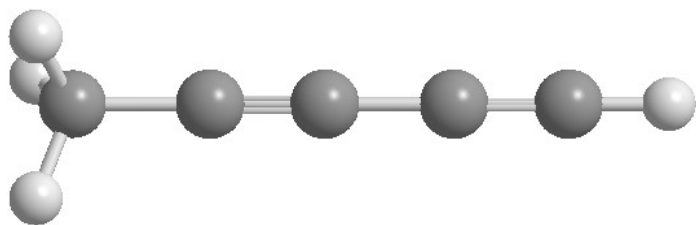

**p4**

T1 diagnostic: 0.01430064

Geometries

|   |          |          |           |
|---|----------|----------|-----------|
| C | 0.000000 | 0.000000 | 1.892449  |
| H | 0.000000 | 0.000000 | 2.952882  |
| C | 0.000000 | 0.000000 | 0.682678  |
| C | 0.000000 | 0.000000 | -0.682678 |
| C | 0.000000 | 0.000000 | -1.892449 |
| H | 0.000000 | 0.000000 | -2.952882 |

Frequencies

|           |           |           |
|-----------|-----------|-----------|
| 235.0769  | 235.0769  | 514.8342  |
| 514.8342  | 647.0721  | 647.0721  |
| 652.7990  | 652.7990  | 907.6747  |
| 2068.6838 | 2239.9926 | 3481.5313 |
| 3482.3864 |           |           |

Picture

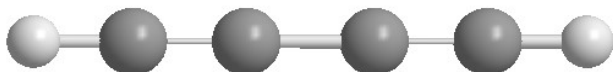

p5

T1 diagnostic: 0.02241138

Geometries

|   |           |           |           |
|---|-----------|-----------|-----------|
| C | 1.253552  | 0.000020  | -0.000017 |
| H | 1.803769  | 0.927723  | -0.000024 |
| H | 1.803827  | -0.927646 | -0.000024 |
| C | -0.118008 | -0.000020 | 0.000012  |
| C | -1.337289 | -0.000069 | 0.000002  |
| H | -2.397122 | 0.000336  | 0.000067  |

Frequencies

|           |           |           |
|-----------|-----------|-----------|
| 348.9451  | 405.9039  | 509.9718  |
| 638.5246  | 676.4915  | 1042.6059 |
| 1074.9223 | 1474.0782 | 2040.9431 |
| 3174.6147 | 3271.1819 | 3484.7045 |

Picture

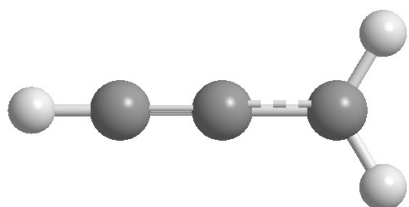

p6

T1 diagnostic: 0.01588649

Geometries

|   |           |           |           |
|---|-----------|-----------|-----------|
| C | -2.585155 | -0.000067 | 0.000207  |
| H | -3.144592 | 0.665645  | -0.643673 |
| C | -1.274098 | -0.000027 | -0.000055 |
| C | 0.000002  | 0.000177  | -0.000457 |
| C | 1.274102  | -0.000001 | -0.000202 |
| C | 2.585149  | -0.000037 | 0.000241  |
| H | 3.144249  | 0.644033  | 0.666046  |
| H | -3.144306 | -0.665748 | 0.644363  |
| H | 3.144642  | -0.644200 | -0.665144 |

Frequencies

|           |           |           |
|-----------|-----------|-----------|
| 149.8653  | 149.8761  | 333.7291  |
| 333.7413  | 528.2716  | 528.2774  |
| 700.5873  | 748.3674  | 854.4652  |
| 854.4693  | 1012.9088 | 1012.9184 |
| 1324.1270 | 1445.7756 | 1514.0314 |
| 1940.4868 | 2209.5899 | 3142.2861 |
| 3143.1021 | 3222.5105 | 3222.5272 |

Picture

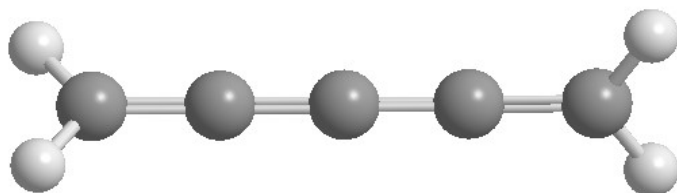



p7

T1 diagnostic: 0.01200065

### Geometries

|   |           |           |           |
|---|-----------|-----------|-----------|
| C | 1.403265  | -0.644393 | -0.236843 |
| C | 0.315647  | 0.000059  | 0.593127  |
| C | -2.200711 | -0.000177 | -0.244099 |
| C | -1.054614 | 0.000326  | 0.134558  |
| C | 1.403087  | 0.644261  | -0.237208 |
| H | 1.794146  | -1.584403 | -0.575189 |
| H | 0.417948  | 0.000073  | 1.673407  |
| H | -3.205701 | -0.000655 | -0.580274 |
| H | 1.793557  | 1.584527  | -0.575152 |

### Frequencies

|           |           |           |
|-----------|-----------|-----------|
| 202.8401  | 217.6552  | 526.2150  |
| 535.9857  | 620.0710  | 632.1997  |
| 666.5304  | 814.0772  | 849.7064  |
| 910.8663  | 966.9411  | 1017.8716 |
| 1057.0719 | 1165.2232 | 1376.9867 |
| 1710.9609 | 2174.1930 | 3116.5819 |
| 3277.6218 | 3324.6412 | 3489.6153 |

### Picture

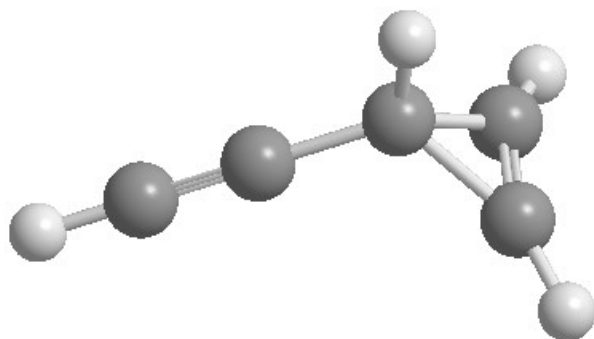

**p8**

T1 diagnostic: 0.01230353

Geometries

|   |           |           |           |
|---|-----------|-----------|-----------|
| C | -1.526255 | -0.710272 | 0.000023  |
| C | -0.248500 | 0.105786  | -0.000051 |
| C | 2.344652  | -0.067889 | 0.000036  |
| C | 1.139938  | 0.035073  | -0.000092 |
| C | -1.359984 | 0.778917  | 0.000077  |
| H | -1.822811 | -1.216764 | -0.913134 |
| H | -1.823045 | -1.216857 | 0.913056  |
| H | 3.401909  | -0.147124 | 0.000228  |
| H | -1.855160 | 1.731050  | -0.000100 |

Frequencies

|           |           |           |
|-----------|-----------|-----------|
| 191.2425  | 204.1444  | 464.3325  |
| 511.3852  | 636.4281  | 650.0415  |
| 653.5126  | 745.9727  | 958.8509  |
| 1011.6820 | 1011.8634 | 1073.4242 |
| 1105.8980 | 1157.7240 | 1531.0755 |
| 1787.0990 | 2174.5397 | 3078.1190 |
| 3152.0575 | 3293.9518 | 3484.0390 |

Picture

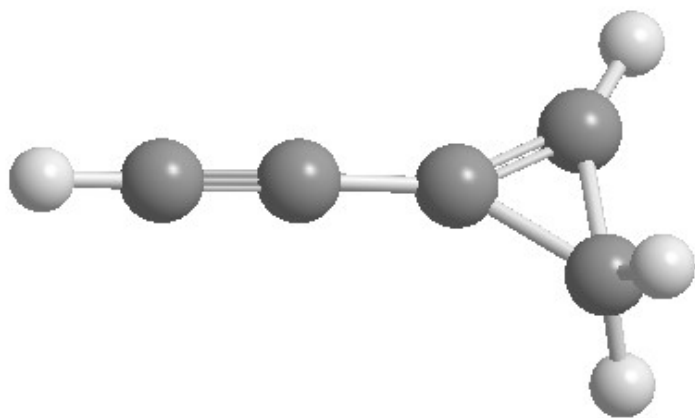

p9

T1 diagnostic: 0.01352481

### Geometries

|   |           |           |           |
|---|-----------|-----------|-----------|
| C | 2.293491  | -0.000114 | 0.000164  |
| C | 0.983781  | 0.000190  | -0.000504 |
| C | -1.604099 | 0.654719  | 0.000118  |
| C | -0.305748 | 0.000299  | 0.000218  |
| C | -1.603956 | -0.654986 | -0.000150 |
| H | 2.863989  | 0.000144  | -0.921583 |
| H | 2.863332  | -0.000620 | 0.922259  |
| H | -2.154068 | 1.577473  | 0.000011  |
| H | -2.154064 | -1.577645 | 0.000232  |

### Frequencies

|           |           |           |
|-----------|-----------|-----------|
| 194.3601  | 196.5593  | 358.9437  |
| 542.6732  | 638.5665  | 639.5816  |
| 716.8701  | 857.6474  | 873.5937  |
| 897.1650  | 981.6659  | 1049.3758 |
| 1058.5812 | 1369.6421 | 1523.2975 |
| 1656.6643 | 2101.3351 | 3114.5431 |
| 3182.5531 | 3264.7458 | 3308.5414 |

### Picture

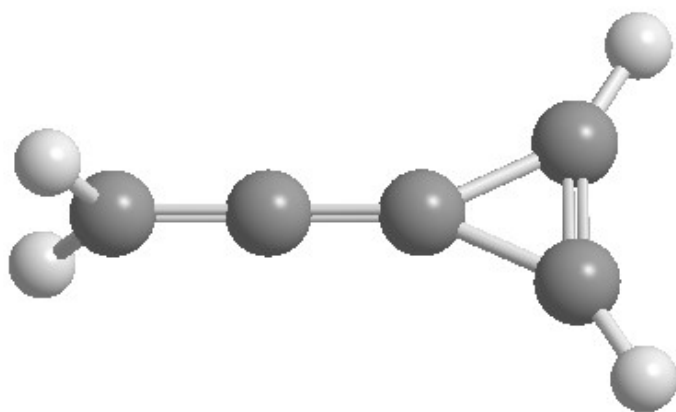

**p10**

T1 diagnostic: 0.01188767

Geometry

|   |           |           |           |
|---|-----------|-----------|-----------|
| C | -1.943649 | -0.316283 | 0.000021  |
| C | -0.954283 | 0.580233  | -0.000029 |
| C | 1.298755  | -0.981552 | -0.000044 |
| C | 0.418412  | 0.139334  | 0.000008  |
| C | 1.730275  | 0.361744  | 0.000051  |
| H | -2.980589 | -0.014563 | 0.000015  |
| H | -1.719166 | -1.373409 | 0.000055  |
| H | -1.159042 | 1.642385  | -0.000080 |
| H | 2.561736  | 1.044729  | -0.000029 |

Frequencies

|           |           |           |
|-----------|-----------|-----------|
| 100.0647  | 207.9696  | 368.4542  |
| 528.7622  | 713.4427  | 748.8952  |
| 903.6409  | 947.3325  | 1023.9557 |
| 1028.3639 | 1028.3922 | 1207.6530 |
| 1305.0367 | 1337.7429 | 1444.5507 |
| 1659.3946 | 1768.4728 | 3167.5831 |
| 3188.7072 | 3262.9390 | 3265.5419 |

Picture

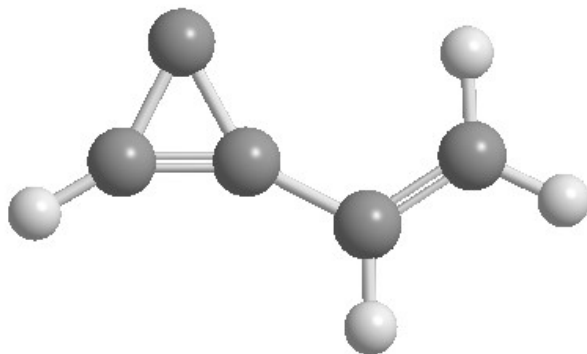

**p11**

T1 diagnostic: 0.02427936

Geometry

|   |           |           |          |
|---|-----------|-----------|----------|
| C | 1.794838  | 1.910498  | 0.000000 |
| C | 0.888913  | 1.051963  | 0.000000 |
| C | 0.000000  | 0.113146  | 0.000000 |
| C | -1.158108 | -0.646288 | 0.000000 |
| C | -1.195468 | -2.003615 | 0.000000 |
| H | 2.545845  | 2.663427  | 0.000000 |
| H | -2.100382 | -0.097055 | 0.000000 |
| H | -2.141749 | -2.529927 | 0.000000 |
| H | -0.284761 | -2.590673 | 0.000000 |

Frequencies

|           |           |           |
|-----------|-----------|-----------|
| 66.3665   | 144.3131  | 337.4583  |
| 404.3470  | 409.9853  | 451.5736  |
| 454.8875  | 617.9994  | 786.9940  |
| 889.0699  | 952.3927  | 1067.5286 |
| 1275.2863 | 1384.4886 | 1526.2893 |
| 1567.2667 | 1760.2690 | 3125.0370 |
| 3166.4166 | 3269.1780 | 3463.2873 |

Picture

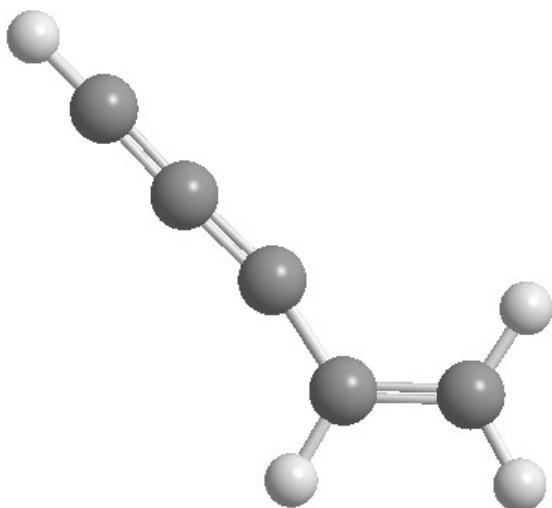

## CH<sub>3</sub>

### Geometries

|   |           |           |           |
|---|-----------|-----------|-----------|
| C | 0.000000  | 0.000000  | 0.000383  |
| H | 0.000000  | 1.075803  | -0.000766 |
| H | 0.931673  | -0.537902 | -0.000766 |
| H | -0.931673 | -0.537902 | -0.000766 |

### Frequencies

|           |           |           |
|-----------|-----------|-----------|
| 514.5117  | 1427.7246 | 1427.7253 |
| 3139.8697 | 3321.1825 | 3321.2000 |

### Picture

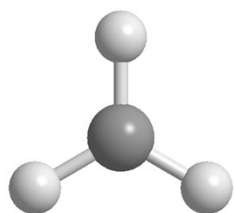

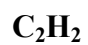

T1 diagnostic: 0.01376912

Geometries

|   |          |          |           |
|---|----------|----------|-----------|
| C | 0.000000 | 0.000000 | 0.601066  |
| H | 0.000000 | 0.000000 | 1.661284  |
| C | 0.000000 | 0.000000 | -0.601066 |
| H | 0.000000 | 0.000000 | -1.661284 |

Frequencies

628.6482    628.6482    762.4262  
762.4262    2028.2071    3438.0702  
3535.6603

Picture

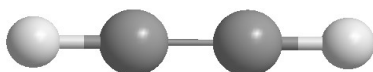

## Transition States

ts i4\_i21

Geometries

|   |           |           |           |
|---|-----------|-----------|-----------|
| C | 2.028638  | -0.654378 | 0.000000  |
| C | 1.032450  | 0.077695  | 0.000000  |
| C | -0.789846 | -0.015470 | 0.000000  |
| C | -1.949875 | -0.620290 | 0.000000  |
| C | 0.056650  | 1.171934  | 0.000000  |
| H | 2.568308  | -1.574093 | 0.000000  |
| H | -2.888128 | -0.059110 | 0.000000  |
| H | -2.036576 | -1.703405 | 0.000000  |
| H | 0.044145  | 1.789832  | 0.902968  |
| H | 0.044145  | 1.789832  | -0.902968 |

Frequencies

|           |           |           |
|-----------|-----------|-----------|
| -682.7640 | 134.2351  | 190.2129  |
| 316.9608  | 355.2958  | 489.6954  |
| 508.9269  | 688.6036  | 853.3299  |
| 906.5767  | 937.8233  | 957.1382  |
| 1025.3346 | 1117.5589 | 1192.5472 |
| 1428.1971 | 1443.8847 | 1764.8748 |
| 1964.5463 | 3014.5281 | 3043.1163 |
| 3071.5310 | 3148.8735 | 3409.8888 |

Picture

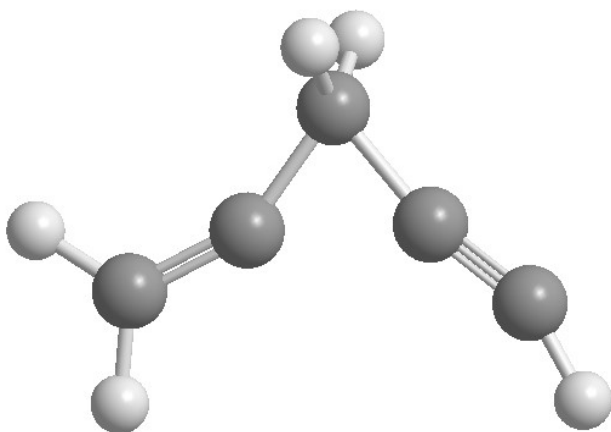



## ts i21\_i22

T1 diagnostic: 0.02221998

### Geometries

|   |           |           |           |
|---|-----------|-----------|-----------|
| C | 0.565764  | -1.965849 | 0.000000  |
| C | 0.222539  | -0.764732 | 0.000000  |
| C | 0.000000  | 0.628643  | 0.000000  |
| C | 0.662279  | 1.776148  | 0.000000  |
| H | 0.128957  | 2.715385  | 0.000000  |
| H | 1.741507  | 1.793900  | 0.000000  |
| C | -1.341818 | 0.058016  | 0.000000  |
| H | -1.880230 | -0.055165 | 0.928545  |
| H | 1.237413  | -2.792318 | 0.000000  |
| H | -1.880230 | -0.055165 | -0.928545 |

### Frequencies

|           |           |           |
|-----------|-----------|-----------|
| -671.1750 | 198.7764  | 243.3501  |
| 309.7393  | 379.0894  | 420.9459  |
| 618.4508  | 691.7729  | 777.5672  |
| 803.6824  | 852.3791  | 930.1959  |
| 959.0081  | 1031.0504 | 1176.6177 |
| 1431.2806 | 1466.3245 | 1721.8096 |
| 1986.0914 | 3154.9570 | 3168.7208 |
| 3263.5462 | 3264.5556 | 3411.3945 |

### Picture

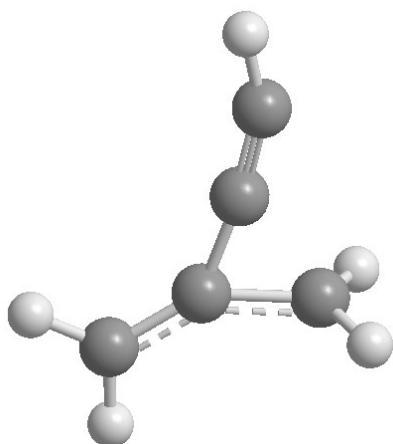

## ts i4\_i6

T1 diagnostic: 0.01284946

### Geometries

|   |           |           |           |
|---|-----------|-----------|-----------|
| C | -2.343629 | -0.511657 | 0.054805  |
| C | -1.304706 | 0.096472  | 0.032629  |
| C | -0.043674 | 0.830923  | 0.007243  |
| H | -0.096444 | 1.616871  | -0.747534 |
| C | 1.139809  | -0.044747 | -0.279603 |
| C | 2.283988  | -0.467223 | 0.142945  |
| H | 3.023621  | -0.444297 | 0.937818  |
| H | 1.821365  | -0.868916 | -0.986646 |
| H | -3.257808 | -1.047416 | 0.075133  |
| H | 0.118535  | 1.321147  | 0.973116  |

### Frequencies

|            |           |           |
|------------|-----------|-----------|
| -2082.8410 | 63.2656   | 183.7960  |
| 245.1564   | 327.5340  | 354.3511  |
| 491.7192   | 632.6427  | 655.1179  |
| 666.4169   | 823.0357  | 888.1964  |
| 942.3686   | 980.5818  | 1220.9121 |
| 1307.9306  | 1464.8719 | 1829.1844 |
| 2193.9781  | 2390.8604 | 3015.9541 |
| 3080.4548  | 3110.1388 | 3491.2537 |

### Picture

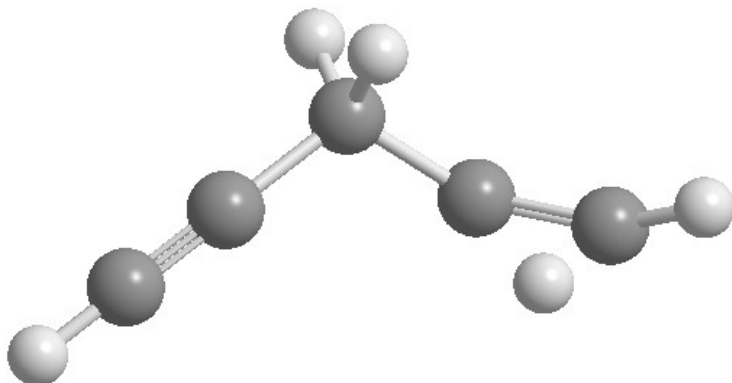

ts i3\_i4

T1 diagnostic: 0.01751347

Geometries

|   |           |           |           |
|---|-----------|-----------|-----------|
| C | 2.488300  | -0.363606 | -0.080381 |
| C | 1.367983  | 0.085166  | -0.032372 |
| C | 0.061439  | 0.639836  | 0.024488  |
| H | -0.411520 | 0.387825  | 1.221404  |
| C | -1.102660 | -0.168087 | 0.246342  |
| C | -2.354110 | -0.286451 | -0.165327 |
| H | -2.629400 | -0.000469 | -1.177955 |
| H | -3.124487 | -0.724401 | 0.452288  |
| H | 3.467455  | -0.766215 | -0.130348 |
| H | -0.067754 | 1.662106  | -0.321892 |

Frequencies

|            |           |           |
|------------|-----------|-----------|
| -1956.7906 | 131.2005  | 210.9864  |
| 316.9679   | 380.5800  | 507.6693  |
| 591.1153   | 663.3064  | 682.5871  |
| 825.8092   | 874.3359  | 921.9520  |
| 1024.8999  | 1103.2911 | 1132.8212 |
| 1292.3507  | 1448.9358 | 1681.9956 |
| 2151.9226  | 2182.2224 | 3094.5810 |
| 3110.8876  | 3216.3021 | 3489.8059 |

Picture

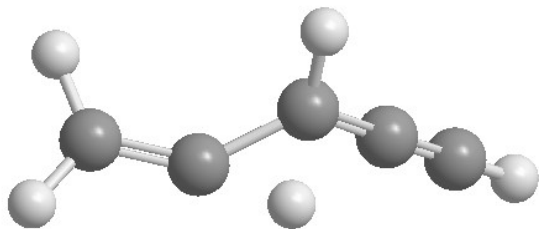

## ts i4\_i16

T1 diagnostic: 0.02919094

### Geometries

|   |           |           |           |
|---|-----------|-----------|-----------|
| C | -2.359856 | -0.529603 | -0.108710 |
| C | -1.304775 | 0.085075  | 0.037428  |
| C | -0.032815 | 0.761340  | -0.047611 |
| H | -0.086986 | 1.840726  | -0.170518 |
| C | 1.164390  | 0.141943  | -0.194089 |
| C | 2.291289  | -0.457374 | 0.057692  |
| H | 2.626262  | -0.645746 | 1.080049  |
| H | 2.953870  | -0.801997 | -0.733465 |
| H | -3.280125 | -1.005867 | 0.136607  |
| H | -0.762418 | 0.604599  | 1.219075  |

### Frequencies

|            |           |           |
|------------|-----------|-----------|
| -1683.4517 | 125.8667  | 179.0119  |
| 326.1496   | 358.9108  | 424.9094  |
| 558.6489   | 614.1086  | 644.6616  |
| 752.8356   | 895.5940  | 901.7555  |
| 954.3229   | 993.3136  | 1100.1426 |
| 1205.1365  | 1340.3387 | 1449.2925 |
| 1908.2200  | 2043.9155 | 3054.1323 |
| 3126.8127  | 3132.8399 | 3432.8557 |

### Picture

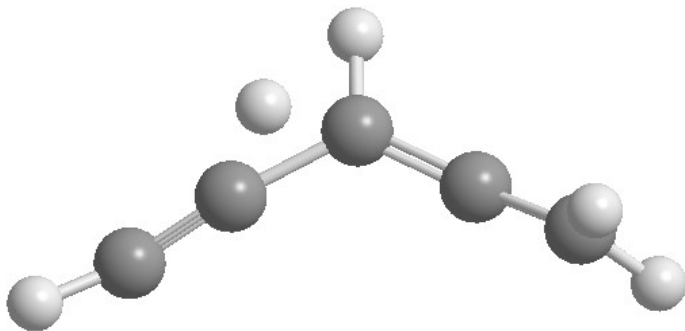

## ts i15\_i18

T1 diagnostic: 0.01584469

### Geometries

|   |           |           |           |
|---|-----------|-----------|-----------|
| C | 2.581352  | -0.053068 | -0.000003 |
| H | 2.947692  | -0.579955 | -0.880862 |
| H | 3.013904  | 0.947472  | -0.000382 |
| C | 1.129203  | 0.001427  | 0.000000  |
| C | -0.086226 | 0.018871  | 0.000001  |
| C | -1.450780 | 0.184392  | 0.000011  |
| H | -2.320867 | 1.109027  | -0.000043 |
| C | -2.707046 | -0.136815 | 0.000004  |
| H | -3.387453 | -0.986089 | -0.000036 |
| H | 2.947710  | -0.579290 | 0.881245  |

### Frequencies

|            |           |           |
|------------|-----------|-----------|
| -2081.5899 | 20.6874   | 136.1712  |
| 142.1374   | 242.2544  | 294.0676  |
| 376.0636   | 484.0667  | 587.1020  |
| 657.9915   | 859.9018  | 1054.7597 |
| 1056.4046  | 1139.5849 | 1423.3010 |
| 1486.9618  | 1490.4661 | 1847.2970 |
| 2272.4608  | 2355.2436 | 3046.9908 |
| 3071.8858  | 3110.2893 | 3114.4816 |

### Picture

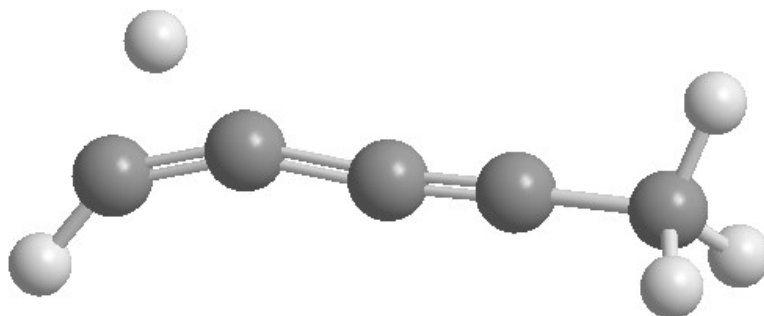

### ts i14\_i18

T1 diagnostic: 0.01727809

#### Geometries

|   |           |           |           |
|---|-----------|-----------|-----------|
| C | -2.638145 | 0.087733  | 0.023331  |
| H | -3.142474 | 1.008270  | -0.242424 |
| H | -3.258440 | -0.752010 | 0.310927  |
| C | -1.328878 | -0.008924 | -0.007552 |
| C | -0.054029 | -0.082376 | -0.034614 |
| C | 1.216999  | -0.268131 | -0.134772 |
| H | 1.993458  | -0.890491 | 0.635789  |
| C | 2.526999  | 0.228470  | 0.025828  |
| H | 3.340003  | -0.264503 | -0.485126 |
| H | 2.729776  | 1.158104  | 0.547513  |

#### Frequencies

|            |           |           |
|------------|-----------|-----------|
| -1843.1828 | 128.2744  | 154.2650  |
| 252.9760   | 354.7533  | 521.3830  |
| 522.9633   | 588.1550  | 754.1855  |
| 813.7477   | 849.8502  | 1014.1771 |
| 1039.0499  | 1054.4087 | 1244.9261 |
| 1459.2084  | 1470.5478 | 1762.5971 |
| 2174.2753  | 2226.4624 | 3105.2457 |
| 3129.8774  | 3204.1986 | 3236.3844 |

#### Picture

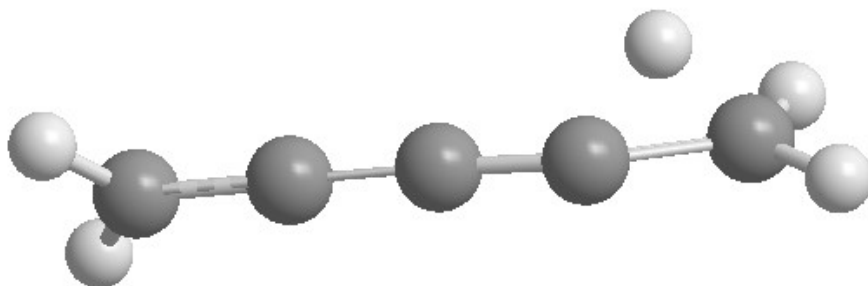

ts i3\_i5

T1 diagnostic: 0.01737646

Geometries

|   |           |           |           |
|---|-----------|-----------|-----------|
| C | 2.209563  | -0.567900 | -0.029612 |
| C | 1.229154  | 0.139396  | 0.011200  |
| C | 0.069313  | 0.957416  | 0.050939  |
| C | -1.152214 | 0.449982  | -0.181223 |
| C | -1.836462 | -0.764975 | 0.031744  |
| H | -2.269357 | 0.427074  | 0.455813  |
| H | -2.645035 | -1.037515 | -0.631597 |
| H | -1.477354 | -1.510082 | 0.737166  |
| H | 3.072312  | -1.182208 | -0.066207 |
| H | 0.203310  | 2.019216  | 0.206540  |

Frequencies

|            |           |           |
|------------|-----------|-----------|
| -1847.9891 | 124.4423  | 273.8417  |
| 310.9324   | 415.6460  | 526.1754  |
| 590.1019   | 637.5045  | 664.9345  |
| 810.3131   | 881.4646  | 957.1466  |
| 1037.5335  | 1101.0151 | 1131.8039 |
| 1353.1778  | 1464.3121 | 1652.4091 |
| 2178.5838  | 2195.3070 | 3089.5648 |
| 3180.9872  | 3223.0992 | 3489.6013 |

Picture

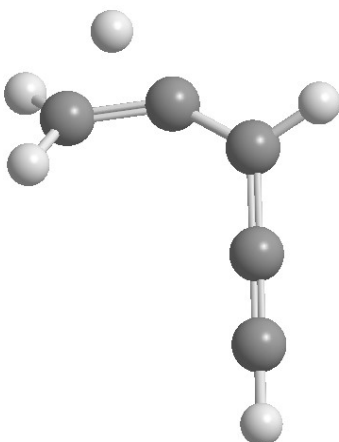

## ts i4\_p2

T1 diagnostic: 0.01580473

### Geometries

|   |           |           |           |
|---|-----------|-----------|-----------|
| C | 2.625816  | -0.315387 | 0.000001  |
| C | 1.451086  | -0.008659 | -0.000001 |
| C | 0.165461  | 0.484513  | -0.000002 |
| C | -1.131079 | 0.447172  | 0.000000  |
| C | -2.324520 | -0.437651 | 0.000001  |
| H | -2.938974 | -0.251969 | -0.879255 |
| H | -2.013523 | -1.485670 | 0.000022  |
| H | -2.938996 | -0.251939 | 0.879234  |
| H | 3.643246  | -0.612402 | 0.000002  |
| H | -0.472339 | 1.582051  | 0.000007  |

### Frequencies

|            |           |           |
|------------|-----------|-----------|
| -2087.0758 | 104.0345  | 130.4980  |
| 232.0448   | 277.4546  | 350.2460  |
| 503.6647   | 510.2599  | 561.6587  |
| 646.6399   | 714.8649  | 1027.5868 |
| 1031.1523  | 1067.2117 | 1395.6624 |
| 1477.8515  | 1487.1017 | 1889.4335 |
| 2159.7508  | 2342.7717 | 3026.1116 |
| 3109.3933  | 3128.1733 | 3486.0599 |

### Picture

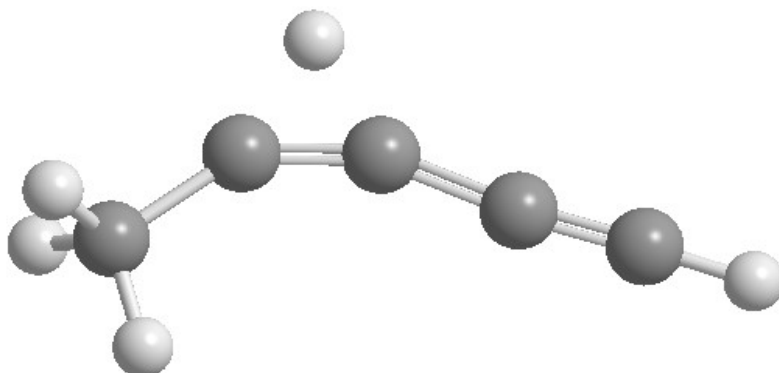



ts i22\_i24

T1 diagnostic: 0.02498764

### Geometries

|   |           |           |           |
|---|-----------|-----------|-----------|
| C | 1.828349  | -0.307762 | 0.000086  |
| H | 2.196679  | -1.322206 | -0.000028 |
| H | 2.548779  | 0.496831  | 0.000237  |
| C | 0.524663  | -0.053570 | 0.000046  |
| C | -0.226140 | 1.248799  | 0.000160  |
| H | -0.297627 | 1.801356  | -0.926636 |
| C | -1.732954 | -0.363982 | -0.000197 |
| C | -0.620284 | -0.948374 | -0.000161 |
| H | -0.297820 | 1.801076  | 0.927108  |
| H | -2.791817 | -0.227726 | -0.000282 |

### Frequencies

|           |           |           |
|-----------|-----------|-----------|
| -807.1340 | 87.5769   | 351.7372  |
| 373.3330  | 535.1122  | 586.7392  |
| 637.5005  | 708.5402  | 750.7700  |
| 831.5249  | 913.7645  | 938.5019  |
| 961.5932  | 1038.7499 | 1244.9653 |
| 1417.4792 | 1451.9726 | 1734.2400 |
| 1798.5147 | 3137.0391 | 3172.2668 |
| 3251.6430 | 3263.7200 | 3395.3736 |

### Picture

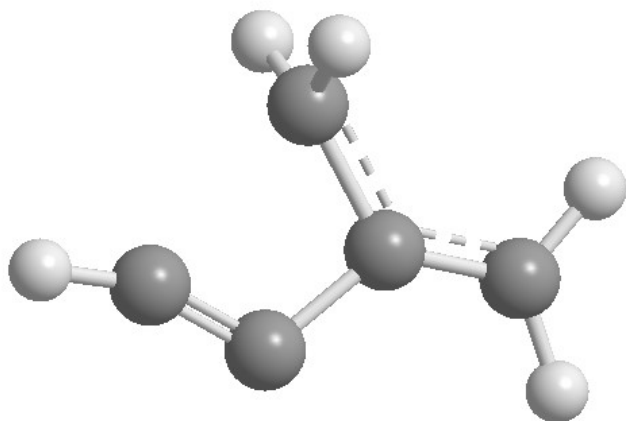

## ts i22\_i9

T1 diagnostic: 0.01296415

### Geometries

|   |           |           |           |
|---|-----------|-----------|-----------|
| C | -2.276940 | -0.095910 | -0.000116 |
| C | -1.074465 | 0.016203  | -0.000052 |
| C | 0.337920  | 0.107208  | 0.000022  |
| C | 1.175923  | 1.136099  | 0.000232  |
| H | 1.106008  | 2.217680  | 0.000429  |
| C | 1.353044  | -1.002919 | -0.000093 |
| H | 1.484499  | -1.564563 | 0.918681  |
| H | 1.484606  | -1.564285 | -0.919021 |
| H | -3.333552 | -0.183617 | -0.000181 |
| H | 2.165551  | 0.130698  | 0.000133  |

### Frequencies

|            |           |           |
|------------|-----------|-----------|
| -2232.2978 | 183.3353  | 233.9933  |
| 466.0297   | 508.9108  | 521.4519  |
| 569.4931   | 655.9815  | 657.0943  |
| 713.5087   | 851.2901  | 965.7487  |
| 994.2517   | 1059.5631 | 1121.2612 |
| 1223.0656  | 1434.9058 | 1711.2916 |
| 1876.6144  | 2200.8361 | 3099.8970 |
| 3172.3971  | 3201.6370 | 3485.6507 |

### Picture

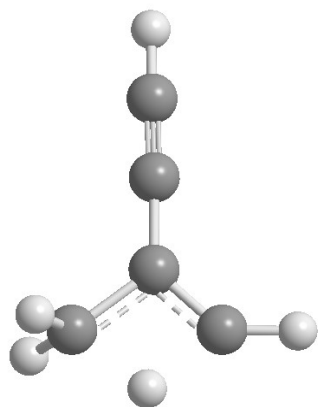

## ts i24\_i25

T1 diagnostic: 0.02793113

### Geometries

|   |           |           |           |
|---|-----------|-----------|-----------|
| C | -1.861601 | -0.068530 | 0.006599  |
| H | -2.376907 | -1.017028 | -0.023802 |
| C | -0.541212 | -0.017037 | -0.020178 |
| C | 0.571759  | 0.998973  | 0.020943  |
| H | 0.668754  | 1.591057  | 0.925521  |
| C | 1.644098  | -0.206182 | -0.086972 |
| C | 0.561158  | -1.042703 | -0.091509 |
| H | 1.233386  | -1.005831 | 0.939975  |
| H | -2.454689 | 0.833643  | 0.055700  |
| H | 0.684238  | 1.611026  | -0.870696 |

### Frequencies

|           |           |           |
|-----------|-----------|-----------|
| -846.9339 | 176.6176  | 346.1641  |
| 431.7800  | 473.6839  | 722.5461  |
| 726.9165  | 840.5928  | 857.5802  |
| 884.4198  | 942.3976  | 950.3800  |
| 1107.6386 | 1141.0638 | 1168.2433 |
| 1373.7435 | 1434.0959 | 1447.9427 |
| 1738.1777 | 2270.2115 | 3092.5080 |
| 3165.6096 | 3171.3399 | 3257.0225 |

### Picture

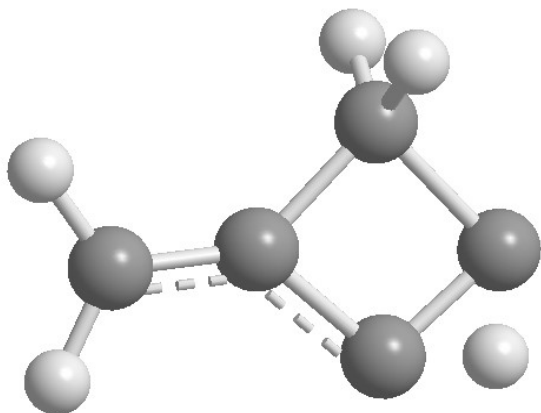

### ts i24\_i14

T1 diagnostic: 0.02392986

#### Geometries

|   |           |           |           |
|---|-----------|-----------|-----------|
| C | 1.973491  | 0.172627  | -0.105332 |
| H | 2.290176  | 1.187314  | 0.077239  |
| C | 0.743169  | -0.212421 | 0.124064  |
| C | -1.042819 | 0.987142  | 0.032632  |
| H | -1.305748 | 1.749020  | -0.697871 |
| C | -1.448653 | -0.381680 | -0.119685 |
| C | -0.312408 | -1.064522 | 0.167643  |
| H | 2.702101  | -0.529609 | -0.489582 |
| H | -0.776197 | 1.342235  | 1.014709  |
| H | -2.387009 | -0.755832 | -0.500427 |

#### Frequencies

|           |           |           |
|-----------|-----------|-----------|
| -748.9935 | 221.3643  | 267.5173  |
| 541.1420  | 555.1971  | 640.4035  |
| 722.1193  | 853.0132  | 862.7648  |
| 893.5591  | 986.3764  | 1005.8466 |
| 1043.2380 | 1169.3659 | 1299.0259 |
| 1431.6830 | 1478.0892 | 1542.4086 |
| 1908.0525 | 3101.8079 | 3156.5836 |
| 3216.5311 | 3241.7632 | 3249.1054 |

#### Picture

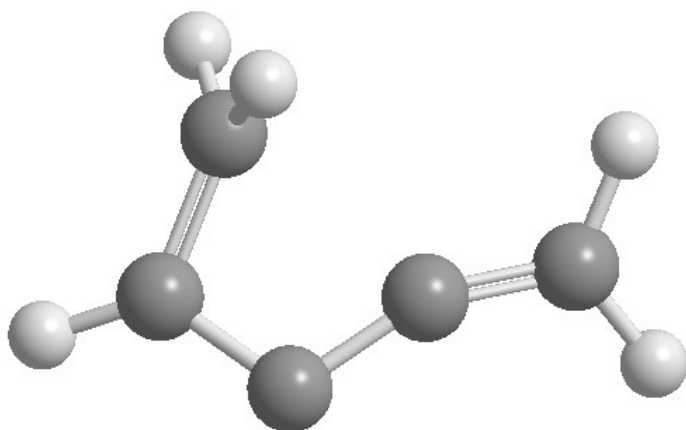

ts i25\_p5

T1 diagnostic: 0.02160105

Geometries

|   |           |           |           |
|---|-----------|-----------|-----------|
| C | 1.844863  | -0.323589 | -0.080710 |
| H | 2.599882  | 0.283010  | -0.567852 |
| C | 0.649497  | 0.183869  | 0.132360  |
| C | -1.124663 | -1.003578 | 0.053986  |
| H | -0.939691 | -1.260837 | 1.088990  |
| C | -1.375000 | 0.318726  | -0.267958 |
| C | -0.338404 | 1.146704  | 0.083763  |
| H | -0.298318 | 2.196953  | 0.320581  |
| H | 2.112595  | -1.323592 | 0.219461  |
| H | -1.412222 | -1.828329 | -0.589827 |

Frequencies

|           |           |           |
|-----------|-----------|-----------|
| -684.7212 | 250.1191  | 295.8160  |
| 442.7249  | 636.4076  | 644.8283  |
| 698.8477  | 803.6778  | 880.6055  |
| 932.7947  | 979.8239  | 1012.9617 |
| 1064.7861 | 1162.8712 | 1292.5533 |
| 1438.8503 | 1474.1960 | 1531.3666 |
| 1788.5530 | 3122.4645 | 3137.8588 |
| 3205.1699 | 3240.9122 | 3245.3289 |

Picture

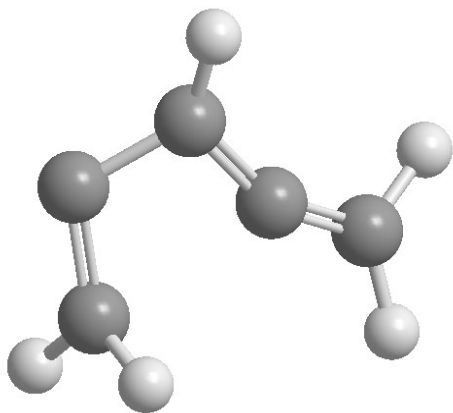

### ts i23\_i25

T1 diagnostic: 0.01910441

#### Geometries

|   |           |           |           |
|---|-----------|-----------|-----------|
| C | 1.854763  | -0.058849 | 0.017517  |
| H | 2.463177  | 0.833920  | 0.030353  |
| C | 0.527768  | 0.018587  | -0.020950 |
| C | -0.614584 | -0.955113 | -0.057416 |
| H | -1.400458 | -0.749287 | 0.934771  |
| C | -1.634087 | 0.080481  | -0.067474 |
| C | -0.508269 | 1.052030  | -0.005668 |
| H | -0.486242 | 2.130412  | 0.015214  |
| H | 2.359287  | -1.013628 | 0.033128  |
| H | -0.689312 | -2.024236 | -0.209519 |

#### Frequencies

|            |           |           |
|------------|-----------|-----------|
| -1123.2304 | 199.7324  | 339.4666  |
| 454.2843   | 670.8965  | 722.0309  |
| 724.4830   | 833.2122  | 870.9338  |
| 921.6650   | 944.3692  | 948.6894  |
| 1078.9839  | 1171.9772 | 1212.6830 |
| 1278.5224  | 1306.2873 | 1458.2248 |
| 1761.7943  | 2097.4955 | 3167.7462 |
| 3193.3311  | 3230.8055 | 3258.0052 |

#### Picture

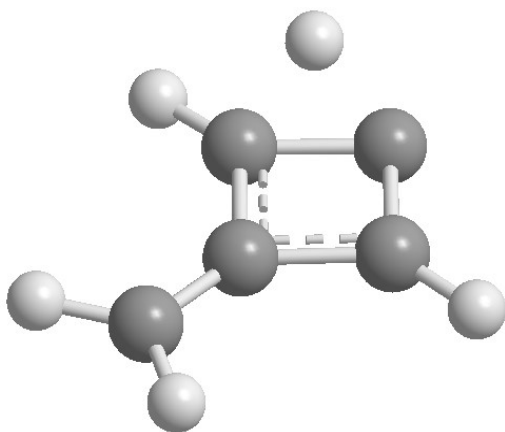

## ts i14\_p5

T1 diagnostic: 0.03070841

### Geometries

|   |           |           |           |
|---|-----------|-----------|-----------|
| C | 2.573286  | 0.090962  | 0.046736  |
| H | 3.367531  | -0.532208 | 0.437059  |
| C | 1.317863  | -0.314679 | 0.043801  |
| C | 0.033472  | -0.035724 | -0.173818 |
| C | -1.249494 | 0.016324  | -0.000422 |
| C | -2.582404 | -0.019841 | 0.068547  |
| H | -3.123071 | -0.774312 | -0.482431 |
| H | -3.134224 | 0.691527  | 0.660614  |
| H | 2.865637  | 1.063713  | -0.341715 |
| H | -0.532213 | 1.129026  | -0.182594 |

### Frequencies

|            |           |           |
|------------|-----------|-----------|
| -1584.0371 | 122.9523  | 144.0991  |
| 287.0716   | 374.2411  | 430.3184  |
| 524.2606   | 597.9555  | 679.1658  |
| 728.4104   | 774.4557  | 882.5586  |
| 1014.0675  | 1024.7323 | 1274.0400 |
| 1444.7887  | 1479.9644 | 1782.7352 |
| 2005.7241  | 2094.2398 | 3090.4438 |
| 3174.8782  | 3187.1865 | 3269.0391 |

### Picture

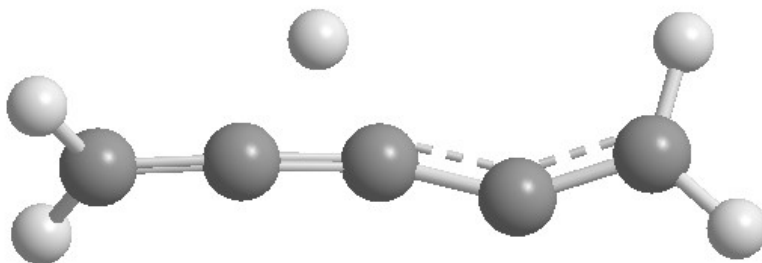

## ts i16\_i17

T1 diagnostic: 0.01551145

### Geometries

|   |           |           |           |
|---|-----------|-----------|-----------|
| C | 2.201315  | -0.638900 | -0.023922 |
| H | 2.533453  | -1.474219 | -0.635982 |
| C | 1.277734  | 0.249777  | 0.132700  |
| C | -0.005818 | 0.850986  | -0.138367 |
| C | -1.131522 | 0.178581  | -0.059320 |
| C | -2.237875 | -0.496216 | 0.065365  |
| H | -2.695062 | -0.987865 | -0.783425 |
| H | -2.736080 | -0.585437 | 1.022564  |
| H | 2.300367  | 0.270714  | 0.894316  |
| H | -0.025686 | 1.911439  | -0.356205 |

### Frequencies

|            |           |           |
|------------|-----------|-----------|
| -2071.7331 | 76.0032   | 183.4007  |
| 260.4560   | 299.3581  | 328.9528  |
| 504.3496   | 628.0099  | 650.9631  |
| 827.1044   | 878.0731  | 881.0676  |
| 916.2515   | 1013.1705 | 1112.9183 |
| 1336.7376  | 1471.6333 | 1852.8240 |
| 2016.8932  | 2364.8677 | 3084.5622 |
| 3136.6014  | 3169.4722 | 3212.4268 |

### Picture

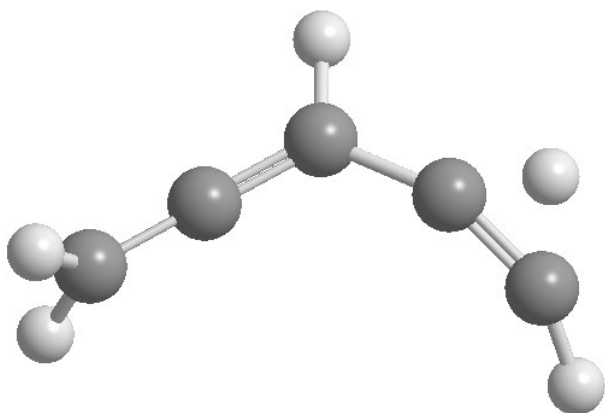



### ts i16\_i23

T1 diagnostic: 0.02096196

#### Geometries

|   |           |           |           |
|---|-----------|-----------|-----------|
| C | -1.949234 | 0.247242  | 0.106612  |
| H | -2.593323 | -0.279308 | 0.799424  |
| C | -0.730694 | -0.177663 | -0.124446 |
| C | 0.328146  | -1.018497 | -0.128878 |
| C | 1.454864  | -0.171704 | 0.198887  |
| C | 1.029308  | 1.048135  | -0.135480 |
| H | -2.330144 | 1.145208  | -0.355504 |
| H | 2.385368  | -0.470113 | 0.665877  |
| H | 1.404778  | 2.060424  | -0.076180 |
| H | 0.338981  | -2.021288 | -0.533785 |

#### Frequencies

|           |           |           |
|-----------|-----------|-----------|
| -747.4630 | 254.6559  | 281.4673  |
| 477.2601  | 612.7561  | 669.4027  |
| 737.3195  | 790.6413  | 857.2000  |
| 872.8668  | 923.6459  | 1001.9618 |
| 1040.1628 | 1062.9328 | 1235.4344 |
| 1343.8067 | 1456.2592 | 1574.6926 |
| 1899.2251 | 3149.4693 | 3166.6463 |
| 3195.7818 | 3211.6302 | 3237.7101 |

#### Picture

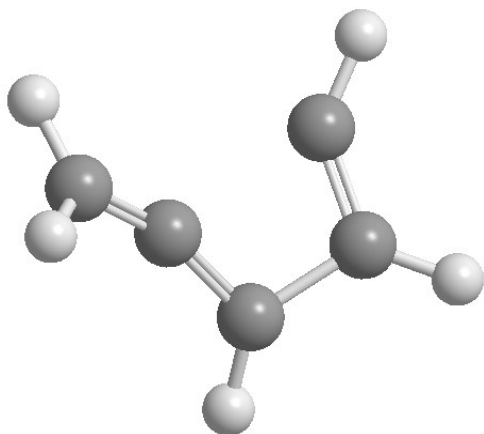

ts i5\_i8

T1 diagnostic: 0.02458066

### Geometries

|   |           |           |           |
|---|-----------|-----------|-----------|
| C | -2.132526 | -0.600499 | -0.000103 |
| H | -2.696969 | -1.501494 | -0.000108 |
| C | -1.099405 | 0.099410  | -0.000045 |
| C | 0.663351  | 0.098209  | -0.000001 |
| C | -0.128838 | 1.135095  | 0.000019  |
| H | -0.131390 | 2.217125  | 0.000083  |
| C | 1.996909  | -0.511539 | 0.000082  |
| H | 2.124868  | -1.144678 | 0.877841  |
| H | 2.125016  | -1.144613 | -0.877703 |
| H | 2.781531  | 0.249601  | 0.000176  |

### Frequencies

|           |           |           |
|-----------|-----------|-----------|
| -714.0594 | 127.7343  | 184.2951  |
| 224.9359  | 390.0926  | 427.9499  |
| 522.7332  | 524.9373  | 778.8800  |
| 875.5947  | 953.4707  | 1044.4800 |
| 1050.3421 | 1176.5266 | 1405.3917 |
| 1476.9562 | 1482.7508 | 1788.3346 |
| 1892.6730 | 3024.1203 | 3098.4217 |
| 3114.4149 | 3172.1820 | 3428.0105 |

### Picture

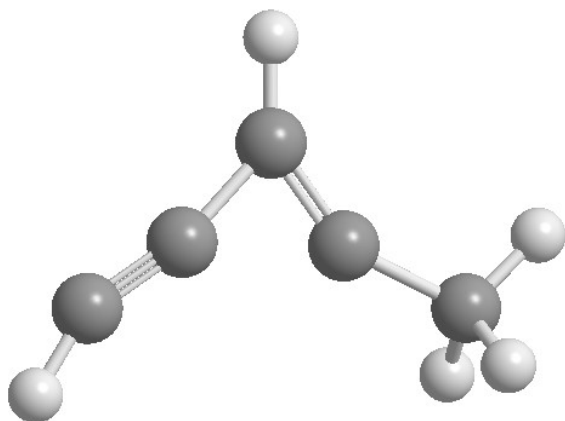

## ts i8\_i9

T1 diagnostic: 0.02313588

### Geometries

|   |           |           |           |
|---|-----------|-----------|-----------|
| C | -2.016670 | -0.619484 | 0.000163  |
| H | -3.078746 | -0.656691 | 0.000355  |
| C | -0.876797 | -0.116614 | 0.000059  |
| C | 0.519705  | 0.159234  | -0.000065 |
| C | 0.055897  | 1.379443  | -0.000084 |
| H | 0.240452  | 2.439830  | -0.000125 |
| C | 1.758048  | -0.660988 | -0.000074 |
| H | 1.779076  | -1.304040 | 0.878839  |
| H | 1.778955  | -1.304216 | -0.878862 |
| H | 2.639162  | -0.024423 | -0.000198 |

### Frequencies

|           |           |           |
|-----------|-----------|-----------|
| -753.6499 | 139.8414  | 226.6035  |
| 248.6633  | 422.3045  | 461.7775  |
| 522.8837  | 552.0443  | 638.8610  |
| 740.6529  | 786.8235  | 987.5164  |
| 1052.9524 | 1199.8603 | 1411.2888 |
| 1489.0064 | 1494.8522 | 1726.7346 |
| 1918.1187 | 3059.7120 | 3125.1107 |
| 3151.1862 | 3260.2945 | 3435.9789 |

### Picture

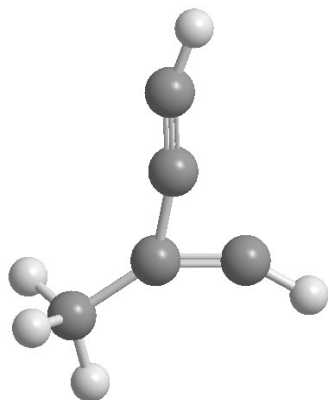

### ts i18\_p3

T1 diagnostic: 0.01368186

#### Geometries

|   |           |           |           |
|---|-----------|-----------|-----------|
| C | -2.601988 | 0.061611  | -0.000070 |
| H | -2.980921 | 0.324724  | 0.991993  |
| H | -3.041656 | -0.898881 | -0.285432 |
| C | -1.151608 | -0.011250 | 0.000259  |
| C | 0.057199  | -0.071353 | 0.000173  |
| C | 1.416395  | -0.142968 | 0.000036  |
| C | 2.628659  | -0.158025 | -0.000120 |
| H | 3.678488  | -0.319348 | -0.000268 |
| H | -2.955222 | 0.817440  | -0.707949 |
| H | 3.207372  | 2.007970  | -0.000019 |

#### Frequencies

|           |           |           |
|-----------|-----------|-----------|
| -348.9190 | 17.3520   | 132.0410  |
| 148.1799  | 233.6316  | 336.8443  |
| 352.7779  | 526.8409  | 538.4429  |
| 632.5779  | 681.1456  | 697.1524  |
| 1046.1448 | 1047.4767 | 1184.8677 |
| 1413.6468 | 1472.3485 | 1472.7095 |
| 2137.6532 | 2333.7805 | 3021.0495 |
| 3080.1231 | 3081.2009 | 3472.9798 |

#### Picture

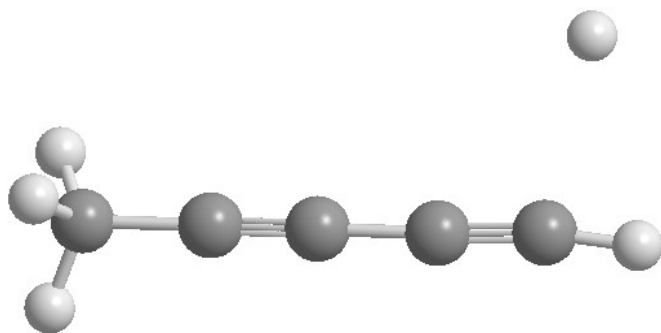

## ts i18\_p6

T1 diagnostic: 0.01813766

### Geometries

|   |           |           |           |
|---|-----------|-----------|-----------|
| C | 2.487519  | -0.145299 | 0.000000  |
| H | 3.042211  | -0.221663 | -0.925031 |
| H | 3.083457  | 1.877199  | 0.000001  |
| C | 1.176424  | -0.121585 | 0.000001  |
| C | -0.090639 | -0.060943 | 0.000001  |
| C | -1.362640 | -0.001193 | 0.000000  |
| C | -2.664352 | 0.060850  | 0.000000  |
| H | -3.267207 | -0.837694 | -0.000033 |
| H | 3.042212  | -0.221731 | 0.925025  |
| H | -3.178544 | 1.012919  | 0.000032  |

### Frequencies

|           |           |           |
|-----------|-----------|-----------|
| -694.5692 | 137.0386  | 151.1984  |
| 264.0875  | 311.1520  | 357.4741  |
| 366.6638  | 553.7887  | 557.8947  |
| 785.3298  | 798.1798  | 882.1672  |
| 901.5274  | 1014.4905 | 1024.3452 |
| 1337.3719 | 1444.4420 | 1527.4249 |
| 1994.7230 | 2391.1036 | 3145.7451 |
| 3151.4978 | 3223.8217 | 3232.7034 |

### Picture

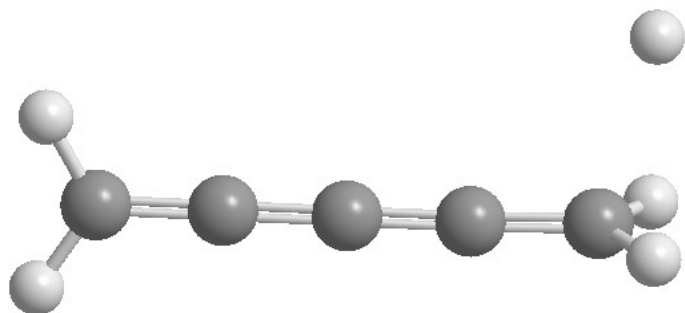

## ts i6\_p2

T1 diagnostic: 0.01622289

### Geometries

|   |           |           |           |
|---|-----------|-----------|-----------|
| C | -2.282775 | -0.544728 | -0.067137 |
| C | -1.259398 | 0.087525  | -0.036464 |
| C | -0.024190 | 0.868840  | -0.009080 |
| H | 0.045651  | 1.470795  | -0.916773 |
| C | 1.189546  | 0.036321  | 0.082398  |
| C | 2.245729  | -0.495618 | -0.191259 |
| H | 3.155614  | -1.034776 | -0.274120 |
| H | -3.180917 | -1.106999 | -0.090349 |
| H | -0.052746 | 1.561695  | 0.832597  |
| H | 0.818933  | -0.604755 | 1.777906  |

### Frequencies

|           |           |           |
|-----------|-----------|-----------|
| -855.7037 | 102.2611  | 171.9114  |
| 318.9862  | 354.9092  | 416.8832  |
| 520.2883  | 569.4926  | 657.5445  |
| 661.9715  | 674.2243  | 682.7544  |
| 911.0033  | 949.2636  | 1002.9928 |
| 1248.8411 | 1343.7192 | 1471.0770 |
| 2139.7196 | 2198.9650 | 3058.6997 |
| 3094.5989 | 3478.9451 | 3490.9363 |

### Picture

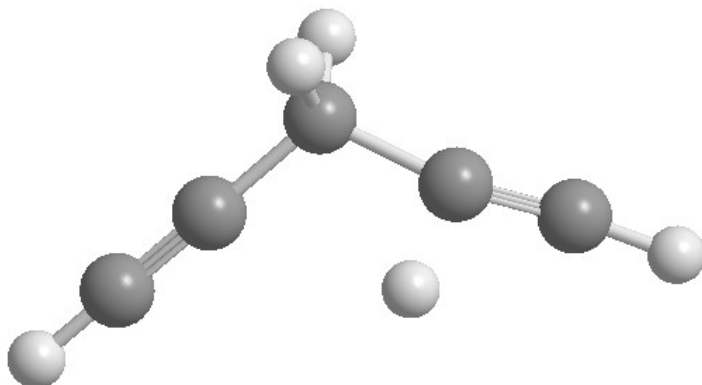

### ts i3\_p1

T1 diagnostic: 0.01707830

#### Geometries

|   |           |           |           |
|---|-----------|-----------|-----------|
| C | 1.104389  | 0.088590  | 0.000000  |
| C | 0.000000  | 0.814234  | 0.000000  |
| C | -1.294776 | 0.215118  | 0.000000  |
| C | 1.974226  | -0.901539 | 0.000000  |
| C | -2.411438 | -0.250098 | 0.000000  |
| H | 2.331960  | 1.547606  | 0.000000  |
| H | 0.053752  | 1.896662  | 0.000000  |
| H | 2.382773  | -1.284779 | 0.928928  |
| H | 2.382773  | -1.284779 | -0.928928 |
| H | -3.385662 | -0.672544 | 0.000000  |

#### Frequencies

|           |           |           |
|-----------|-----------|-----------|
| -924.3869 | 95.3518   | 150.8665  |
| 283.0914  | 360.1403  | 388.9960  |
| 548.3642  | 594.4698  | 632.0588  |
| 632.5458  | 683.0897  | 875.0433  |
| 880.5204  | 963.0874  | 1015.1830 |
| 1134.7664 | 1358.9554 | 1470.2997 |
| 1977.8610 | 2179.9645 | 3143.9253 |
| 3189.2392 | 3229.1710 | 3495.5619 |

#### Picture

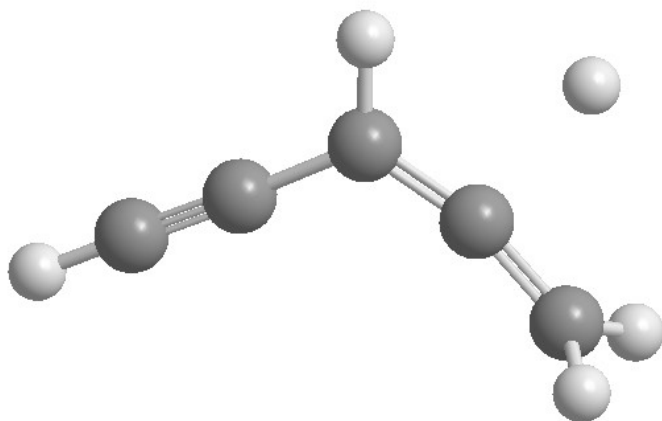

### ts i5\_p3

T1 diagnostic: 0.01732475

#### Geometries

|   |           |           |           |
|---|-----------|-----------|-----------|
| C | 2.704893  | -0.159419 | 0.000003  |
| C | 1.506741  | -0.014471 | -0.000001 |
| C | 0.139365  | 0.167505  | -0.000006 |
| C | -1.055239 | -0.093515 | -0.000004 |
| C | -2.504126 | -0.117425 | 0.000003  |
| H | -2.896060 | 0.902111  | 0.000082  |
| H | -2.886172 | -0.628764 | -0.882693 |
| H | -2.886161 | -0.628895 | 0.882627  |
| H | 3.755933  | -0.296527 | 0.000007  |
| H | 0.162650  | 1.956024  | 0.000006  |

#### Frequencies

|            |           |           |
|------------|-----------|-----------|
| -1038.4136 | 91.6988   | 138.7393  |
| 165.3440   | 313.2104  | 348.5632  |
| 533.7056   | 535.4446  | 576.1682  |
| 652.2279   | 659.9454  | 727.4113  |
| 1045.4896  | 1060.3141 | 1172.4265 |
| 1418.8185  | 1480.2539 | 1485.6591 |
| 2131.6789  | 2340.3431 | 3039.3237 |
| 3103.9625  | 3122.4627 | 3491.5208 |

#### Picture

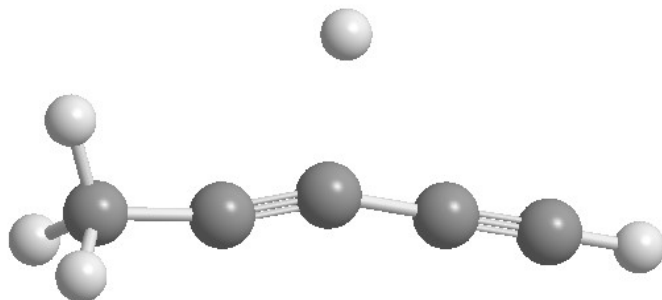





### ts i7\_p3

T1 diagnostic: 0.01651544

#### Geometries

|   |           |           |           |
|---|-----------|-----------|-----------|
| C | 2.754172  | -0.045341 | -0.000009 |
| C | 1.545301  | -0.037044 | -0.000006 |
| C | 0.182871  | -0.039461 | -0.000003 |
| C | -1.029601 | 0.084391  | 0.000007  |
| C | -2.469533 | -0.166435 | -0.000004 |
| H | -2.657113 | -1.239307 | -0.000066 |
| H | -2.937471 | 0.270921  | 0.879996  |
| H | -2.937475 | 0.271024  | -0.879951 |
| H | 3.814317  | -0.048125 | -0.000012 |
| H | -1.181516 | 1.968834  | 0.000118  |

#### Frequencies

|           |           |           |
|-----------|-----------|-----------|
| -844.1659 | 137.2327  | 142.9277  |
| 173.2395  | 362.5131  | 396.9164  |
| 479.7443  | 525.5927  | 572.4204  |
| 650.1482  | 658.6927  | 695.6921  |
| 1055.5988 | 1067.5073 | 1173.4548 |
| 1421.8556 | 1486.2757 | 1491.8128 |
| 2146.1265 | 2374.8209 | 3059.0395 |
| 3131.2699 | 3131.5696 | 3490.4828 |

#### Picture

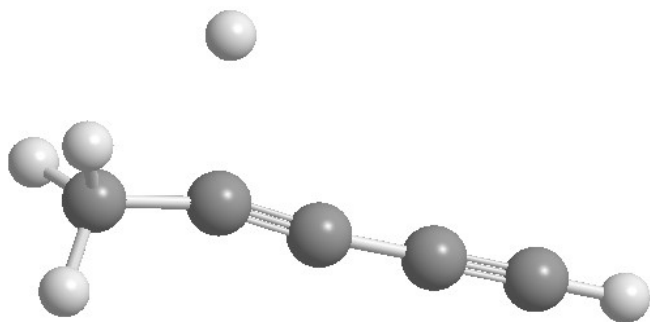

### ts i15\_p3

T1 diagnostic: 0.01740758

#### Geometries

|   |           |           |           |
|---|-----------|-----------|-----------|
| C | -2.553264 | -0.065443 | 0.000060  |
| H | -2.918703 | -0.592744 | 0.880481  |
| H | -2.978523 | 0.937424  | 0.003407  |
| C | -1.101250 | -0.008693 | -0.000105 |
| C | 0.106779  | 0.030083  | -0.000082 |
| C | 1.484836  | 0.094503  | -0.000012 |
| H | 1.558960  | 1.860736  | 0.000078  |
| C | 2.653987  | -0.260973 | 0.000046  |
| H | 3.710935  | -0.355184 | 0.000106  |
| H | -2.919198 | -0.587101 | -0.883512 |

#### Frequencies

|            |           |           |
|------------|-----------|-----------|
| -1127.0485 | 12.5531   | 148.2890  |
| 157.9671   | 350.5728  | 354.0362  |
| 501.5871   | 532.1614  | 571.4611  |
| 625.3958   | 658.4621  | 723.9185  |
| 1058.7289  | 1059.9447 | 1176.2384 |
| 1424.1406  | 1489.2021 | 1489.4892 |
| 2086.5422  | 2383.2118 | 3053.9948 |
| 3121.1787  | 3121.9533 | 3473.0523 |

#### Picture

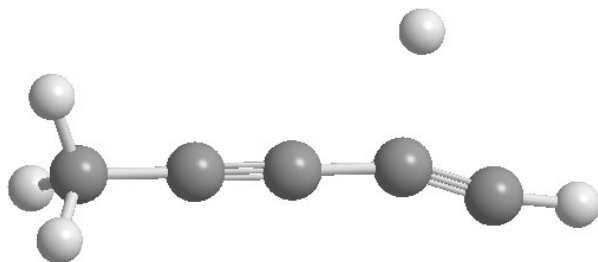

## ts i16\_p1

T1 diagnostic: 0.01325162

### Geometries

|   |           |           |           |
|---|-----------|-----------|-----------|
| C | 2.266139  | -0.449712 | 0.029828  |
| C | 1.126751  | 0.168971  | -0.012888 |
| C | -0.017259 | 0.805781  | -0.053343 |
| C | -1.277142 | 0.113696  | 0.000918  |
| C | -2.127684 | -0.752216 | -0.010005 |
| H | 2.750718  | -0.791892 | -0.878943 |
| H | 2.760250  | -0.644890 | 0.976161  |
| H | -0.026285 | 1.887558  | -0.131915 |
| H | -2.964017 | -1.409495 | 0.005328  |
| H | -2.345495 | 1.639599  | 0.302306  |

### Frequencies

|           |           |           |
|-----------|-----------|-----------|
| -850.1180 | 40.5544   | 152.0312  |
| 326.2564  | 370.7973  | 405.3522  |
| 536.8729  | 614.5898  | 641.1131  |
| 673.1278  | 687.1721  | 894.1780  |
| 902.9041  | 957.9484  | 1013.5390 |
| 1140.0000 | 1347.6332 | 1472.3106 |
| 2074.9596 | 2139.7756 | 3148.7453 |
| 3189.7489 | 3232.9097 | 3472.1616 |

### Picture

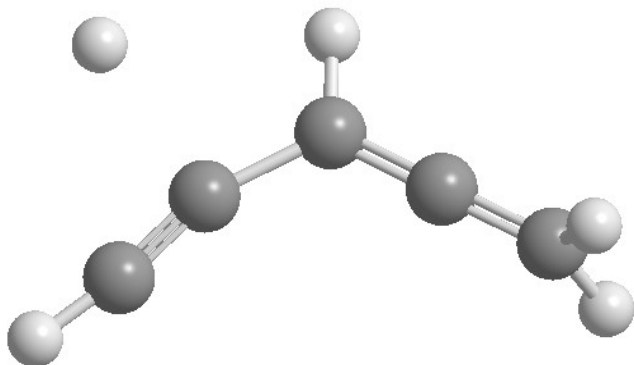

## ts i17\_p6

T1 diagnostic: 0.01911124

### Geometries

|   |           |           |           |
|---|-----------|-----------|-----------|
| C | 2.563150  | -0.139787 | -0.000040 |
| H | 3.149826  | 0.772105  | -0.000224 |
| C | 1.263032  | -0.091978 | 0.000048  |
| C | 0.002093  | 0.175391  | 0.000079  |
| C | -1.267312 | 0.008051  | 0.000003  |
| C | -2.557098 | -0.160532 | -0.000035 |
| H | -3.110026 | -0.234719 | -0.926703 |
| H | -3.110118 | -0.234454 | 0.926600  |
| H | 3.096873  | -1.080866 | 0.000068  |
| H | -0.049737 | 2.031058  | -0.000072 |

### Frequencies

|            |           |           |
|------------|-----------|-----------|
| -1029.5411 | 152.3266  | 158.2507  |
| 254.1352   | 324.5298  | 361.8258  |
| 497.9987   | 556.9792  | 577.2201  |
| 735.9734   | 805.2055  | 880.5638  |
| 885.1548   | 1001.7879 | 1013.5455 |
| 1337.1724  | 1438.3401 | 1528.8917 |
| 2013.5058  | 2330.8666 | 3130.5640 |
| 3150.4561  | 3211.4359 | 3229.5692 |

### Picture

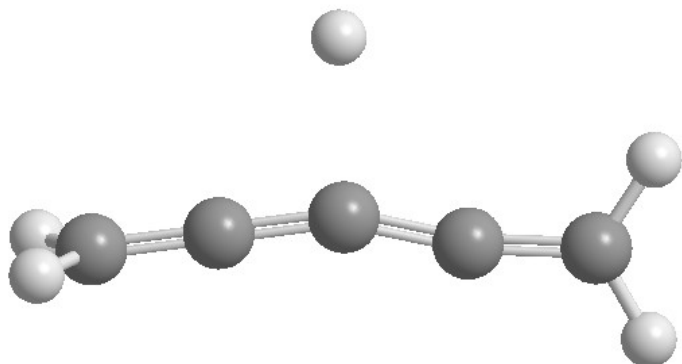

## ts i17\_p1

T1 diagnostic: 0.01388495

### Geometries

|   |           |           |           |
|---|-----------|-----------|-----------|
| C | -2.344543 | -0.458770 | -0.044864 |
| H | -2.787200 | -0.950300 | 0.816951  |
| C | -1.196000 | 0.140589  | 0.035697  |
| C | -0.040997 | 0.764367  | 0.121846  |
| C | 1.215760  | 0.147692  | -0.112849 |
| C | 2.307230  | -0.350101 | -0.256256 |
| H | 2.821920  | -1.072399 | 1.829400  |
| H | 3.249652  | -0.764582 | -0.517875 |
| H | -2.899206 | -0.495409 | -0.978304 |
| H | -0.033865 | 1.820021  | 0.388386  |

### Frequencies

|           |           |           |
|-----------|-----------|-----------|
| -296.7828 | 59.8533   | 141.3162  |
| 200.0166  | 310.1157  | 359.5917  |
| 365.0488  | 606.6565  | 632.9142  |
| 681.4379  | 685.8594  | 882.7980  |
| 883.7699  | 954.5227  | 1000.8610 |
| 1137.7811 | 1351.9082 | 1462.0597 |
| 2035.3060 | 2175.9421 | 3111.0644 |
| 3115.9454 | 3183.3737 | 3473.6753 |

### Picture

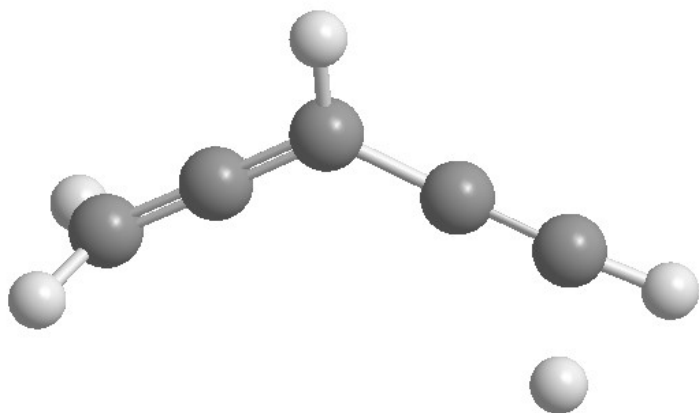

## ts i14\_p6

T1 diagnostic: 0.01844492

### Geometries

|   |           |           |           |
|---|-----------|-----------|-----------|
| C | -2.611300 | -0.022949 | 0.000031  |
| H | -3.169672 | -0.013886 | -0.926259 |
| H | -3.169651 | -0.013766 | 0.926333  |
| C | -1.305778 | -0.042131 | 0.000018  |
| C | -0.038194 | -0.066797 | 0.000006  |
| C | 1.240403  | 0.037523  | -0.000018 |
| H | 1.267634  | 2.044559  | -0.000205 |
| C | 2.533470  | -0.157063 | -0.000012 |
| H | 3.238649  | 0.659236  | -0.000069 |
| H | 2.921432  | -1.167635 | 0.000047  |

### Frequencies

|           |           |           |
|-----------|-----------|-----------|
| -922.9292 | 147.3689  | 151.0926  |
| 245.7289  | 356.0059  | 413.0314  |
| 465.7142  | 556.5635  | 572.4855  |
| 770.3624  | 789.8493  | 886.3274  |
| 898.0016  | 1019.7187 | 1020.9228 |
| 1344.6124 | 1448.1739 | 1537.0166 |
| 2008.6272 | 2320.0424 | 3150.4316 |
| 3156.0925 | 3231.0196 | 3247.5919 |

### Picture

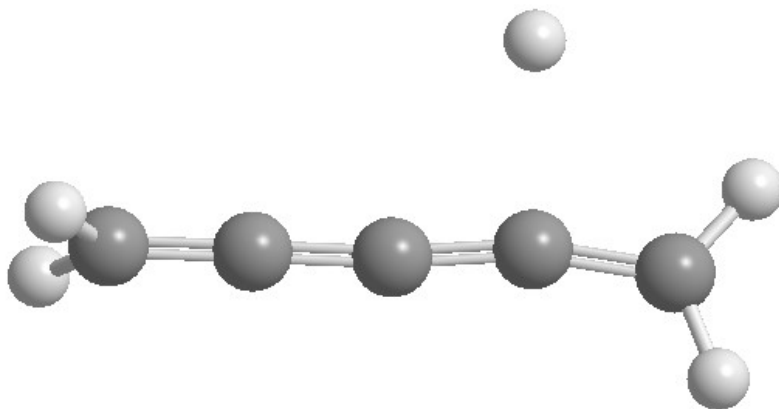

## ts i4\_p1

T1 diagnostic: 0.01881087

### Geometries

|   |           |           |           |
|---|-----------|-----------|-----------|
| C | 2.364407  | -0.518315 | 0.066665  |
| C | 1.300321  | 0.036081  | -0.041576 |
| C | 0.050412  | 0.720068  | -0.190007 |
| H | 0.139847  | 1.660796  | 1.383401  |
| C | -1.112963 | 0.083404  | -0.122643 |
| C | -2.266037 | -0.473470 | 0.081142  |
| H | -2.765671 | -1.047117 | -0.688847 |
| H | -2.762935 | -0.382332 | 1.040832  |
| H | 3.296604  | -1.012847 | 0.166061  |
| H | 0.075319  | 1.694895  | -0.662932 |

### Frequencies

|            |           |           |
|------------|-----------|-----------|
| -1007.7540 | 135.3910  | 228.4748  |
| 306.8188   | 347.8146  | 456.4978  |
| 499.3027   | 589.3505  | 634.2926  |
| 648.6982   | 678.6041  | 891.0297  |
| 947.2245   | 970.1377  | 998.5289  |
| 1127.8925  | 1350.4274 | 1462.6591 |
| 1993.8668  | 2210.9490 | 3125.6171 |
| 3156.8046  | 3204.0594 | 3490.5878 |

### Picture

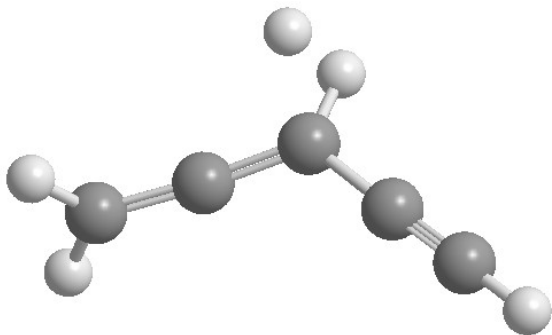



## ts i4\_p2

T1 diagnostic: 0.01590452

### Geometries

|   |           |           |           |
|---|-----------|-----------|-----------|
| C | 2.335280  | -0.561825 | 0.069890  |
| C | 1.316479  | 0.076132  | 0.016721  |
| C | 0.084924  | 0.863810  | -0.046999 |
| H | 0.007234  | 1.489823  | 0.846576  |
| C | -1.118464 | 0.042895  | -0.152223 |
| C | -2.172471 | -0.552415 | -0.093856 |
| H | -2.993823 | -1.195864 | -0.289809 |
| H | -3.051550 | 0.077102  | 1.463062  |
| H | 3.229790  | -1.128497 | 0.117272  |
| H | 0.133867  | 1.545849  | -0.898302 |

### Frequencies

|           |           |           |
|-----------|-----------|-----------|
| -765.6252 | 58.4791   | 135.8888  |
| 241.1774  | 315.7839  | 335.1131  |
| 457.8571  | 575.5637  | 661.4167  |
| 666.3277  | 675.2410  | 835.4970  |
| 908.5266  | 938.3521  | 1005.8432 |
| 1245.4677 | 1343.5789 | 1464.2734 |
| 2165.1872 | 2199.1480 | 3036.5213 |
| 3073.6189 | 3462.5980 | 3490.3188 |

### Picture

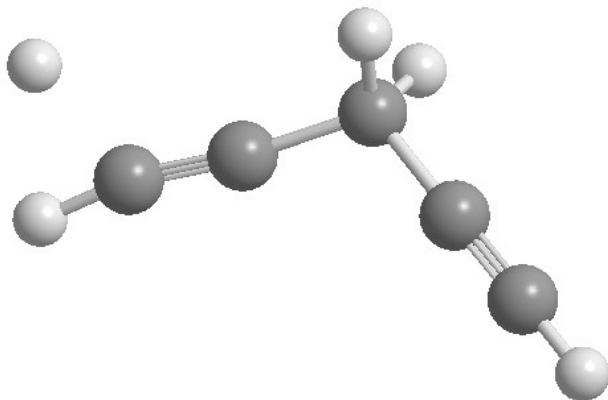

## ts i9\_p4

T1 diagnostic: 0.01837190

### Geometries

|   |           |           |           |
|---|-----------|-----------|-----------|
| C | 2.163877  | 0.017291  | 0.000069  |
| C | 0.990538  | -0.264267 | 0.000025  |
| C | -0.364132 | -0.556117 | -0.000012 |
| C | -1.310431 | -1.340641 | -0.000040 |
| C | -1.070846 | 1.537361  | -0.000031 |
| H | 3.199127  | 0.244709  | 0.000096  |
| H | -2.287406 | -1.757270 | -0.000065 |
| H | -2.143585 | 1.427085  | -0.000026 |
| H | -0.611084 | 1.861870  | 0.920233  |
| H | -0.611089 | 1.861840  | -0.920307 |

### Frequencies

|           |           |           |
|-----------|-----------|-----------|
| -653.2117 | 92.3512   | 157.8948  |
| 244.2719  | 271.1698  | 468.0147  |
| 487.1336  | 536.5857  | 574.9852  |
| 576.1628  | 649.5853  | 661.5000  |
| 684.5715  | 866.8183  | 930.2515  |
| 1434.5666 | 1439.0810 | 1981.5785 |
| 2277.4538 | 3115.9683 | 3281.2300 |
| 3282.8221 | 3457.5561 | 3491.6118 |

### Picture

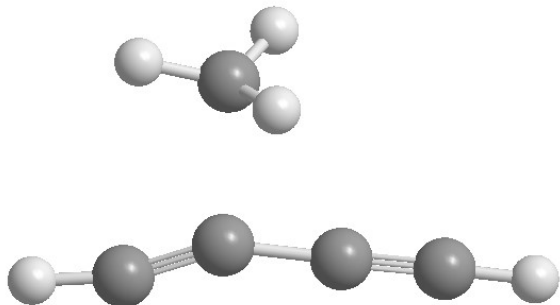

## ts i7\_p4

T1 diagnostic: 0.01752857

### Geometries

|   |           |           |           |
|---|-----------|-----------|-----------|
| C | 2.570526  | -0.472643 | -0.000001 |
| C | 1.471044  | 0.030331  | 0.000001  |
| C | 0.239776  | 0.611559  | 0.000005  |
| C | -0.926447 | 0.972920  | 0.000007  |
| C | -2.400874 | -0.802412 | -0.000004 |
| H | 3.532808  | -0.917430 | -0.000001 |
| H | -1.741674 | 1.654637  | 0.000022  |
| H | -1.697751 | -1.618241 | 0.000322  |
| H | -2.909077 | -0.578652 | 0.924512  |
| H | -2.908461 | -0.578846 | -0.924904 |

### Frequencies

|           |           |           |
|-----------|-----------|-----------|
| -527.1545 | 45.4405   | 90.7136   |
| 240.3142  | 285.2703  | 447.3365  |
| 486.7091  | 513.0236  | 534.3165  |
| 636.0572  | 658.0346  | 666.8696  |
| 719.9057  | 834.9256  | 915.9905  |
| 1430.4088 | 1438.4911 | 2046.0588 |
| 2312.3417 | 3121.1539 | 3286.0720 |
| 3295.9448 | 3437.9842 | 3491.2955 |

### Picture

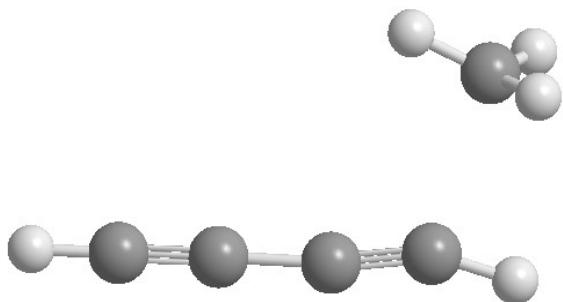

## ts i16\_p5

T1 diagnostic: 0.01941648

### Geometries

|   |           |           |           |
|---|-----------|-----------|-----------|
| C | -2.325168 | -0.440529 | 0.167677  |
| C | -1.232053 | 0.302507  | 0.017359  |
| C | -0.132156 | 0.890968  | -0.142182 |
| C | 1.469508  | -0.433652 | -0.412419 |
| C | 2.418492  | -0.241025 | 0.339576  |
| H | -2.645434 | -0.765234 | 1.146937  |
| H | -2.935529 | -0.711404 | -0.681467 |
| H | 0.317808  | 1.858368  | -0.179108 |
| H | 1.000776  | -0.980150 | -1.198611 |
| H | 3.070645  | 0.128803  | 1.092192  |

### Frequencies

|           |           |           |
|-----------|-----------|-----------|
| -750.3178 | 23.0189   | 131.0840  |
| 250.5556  | 321.2804  | 396.7144  |
| 486.7191  | 558.1810  | 649.3702  |
| 713.6988  | 758.3494  | 779.5842  |
| 803.1368  | 896.6339  | 1037.1073 |
| 1162.5929 | 1478.7822 | 1828.4307 |
| 1962.4301 | 3159.6648 | 3245.5991 |
| 3365.8915 | 3373.6068 | 3469.9728 |

### Picture

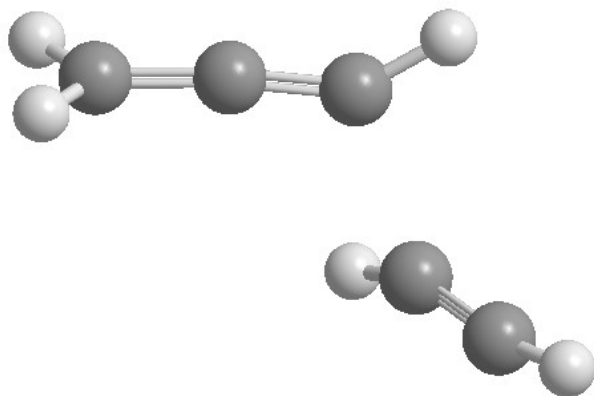

ts i2\_i3

T1 diagnostic: 0.01886575

Geometries

|   |           |           |           |
|---|-----------|-----------|-----------|
| C | -1.173263 | 0.265832  | 0.397283  |
| C | -2.039343 | -0.563635 | -0.176912 |
| H | -1.377289 | 0.634007  | 1.399037  |
| H | -1.871501 | -0.955803 | -1.169923 |
| H | -2.936954 | -0.874086 | 0.337701  |
| C | 0.070577  | 0.742865  | -0.240132 |
| C | 2.342709  | -0.466376 | 0.090426  |
| C | 1.277805  | 0.105695  | -0.065298 |
| H | 0.046669  | 1.654875  | -0.822638 |
| H | 3.268166  | -0.965281 | 0.223621  |

Frequencies

|           |           |           |
|-----------|-----------|-----------|
| -205.9614 | 172.5542  | 317.4602  |
| 381.9529  | 474.7755  | 504.6432  |
| 603.0420  | 642.6214  | 689.7026  |
| 934.8869  | 968.1410  | 1011.4217 |
| 1062.7918 | 1142.9866 | 1323.5165 |
| 1356.8981 | 1461.4688 | 1685.8789 |
| 2046.5426 | 3125.2747 | 3162.6589 |
| 3173.8448 | 3251.4489 | 3485.1351 |

Picture

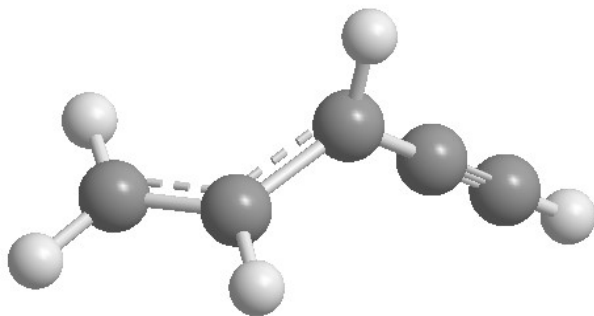



## ts i10\_i12

T1 diagnostic: 0.01425934

### Geometries

|   |           |           |           |
|---|-----------|-----------|-----------|
| C | -2.183810 | 0.218611  | 0.094683  |
| C | -0.929031 | -0.398487 | -0.241353 |
| C | 1.498749  | 0.761926  | -0.049030 |
| C | 0.350747  | -0.135811 | -0.047579 |
| C | 1.726850  | -0.527150 | 0.104286  |
| H | -3.023617 | 0.079212  | -0.571081 |
| H | -2.268548 | 0.981484  | 0.862790  |
| H | -1.842495 | -1.017090 | 0.422308  |
| H | 1.905896  | 1.753705  | -0.130720 |
| H | 2.447738  | -1.311850 | 0.250669  |

### Frequencies

|            |           |           |
|------------|-----------|-----------|
| -1954.7089 | 161.6020  | 227.8687  |
| 361.0961   | 391.7386  | 525.1827  |
| 632.2057   | 744.4072  | 817.0462  |
| 839.9792   | 896.2884  | 966.1573  |
| 1038.2031  | 1059.5102 | 1072.4808 |
| 1249.4872  | 1462.6734 | 1586.3718 |
| 1810.6381  | 2202.8767 | 3091.1381 |
| 3215.0934  | 3247.5975 | 3289.7639 |

### Picture

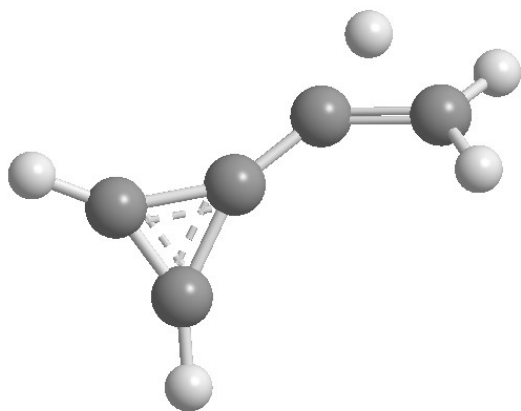

### ts i10\_i13

T1 diagnostic: 0.02671607

#### Geometries

|   |           |           |           |
|---|-----------|-----------|-----------|
| C | 2.143885  | 0.239922  | -0.014310 |
| C | 1.009528  | -0.563298 | -0.138085 |
| C | -1.387338 | 0.808205  | -0.050147 |
| C | -0.302835 | -0.173177 | 0.033872  |
| C | -1.706167 | -0.472546 | -0.003038 |
| H | 3.004779  | 0.032736  | -0.630676 |
| H | 2.271777  | 0.963765  | 0.782488  |
| H | 0.396965  | -0.637188 | 1.057024  |
| H | -1.731498 | 1.822183  | -0.149258 |
| H | -2.484460 | -1.216126 | -0.029330 |

#### Frequencies

|            |           |           |
|------------|-----------|-----------|
| -1375.1904 | 186.7236  | 287.2656  |
| 422.1596   | 464.9455  | 548.7104  |
| 615.5553   | 646.6831  | 744.1127  |
| 839.5573   | 917.3098  | 964.0903  |
| 989.5611   | 1039.6923 | 1096.3970 |
| 1267.4929  | 1473.4221 | 1570.8701 |
| 1680.1714  | 1933.8307 | 3125.0068 |
| 3235.3625  | 3241.7157 | 3284.5634 |

#### Picture

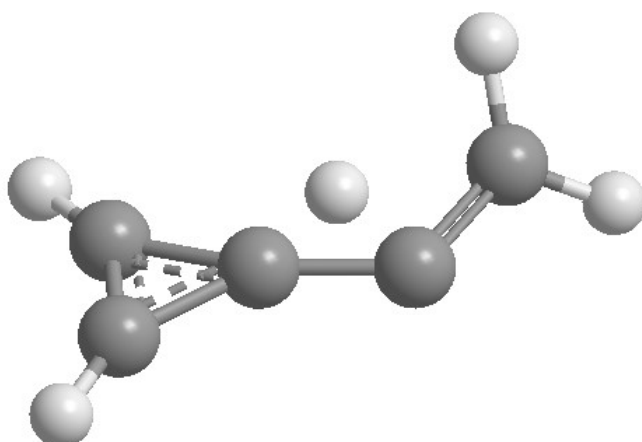



## ts i1\_i2

T1 diagnostic: 0.02692907

### Geometries

|   |           |           |           |
|---|-----------|-----------|-----------|
| C | -1.718473 | -0.492460 | -0.364056 |
| C | -0.140547 | 0.669135  | -0.152317 |
| C | 2.270871  | -0.319331 | 0.001855  |
| C | 1.145357  | 0.123718  | -0.091146 |
| C | -1.226717 | 0.192294  | 0.726251  |
| H | -2.014222 | 0.034256  | -1.261535 |
| H | -1.883698 | -1.567620 | -0.377650 |
| H | -0.320744 | 1.497001  | -0.824119 |
| H | 3.254012  | -0.707631 | 0.074722  |
| H | -1.018284 | -0.296144 | 1.665061  |

### Frequencies

|            |           |           |
|------------|-----------|-----------|
| -1043.4202 | 172.0304  | 210.3151  |
| 446.8276   | 509.2650  | 531.8574  |
| 665.6640   | 674.1642  | 717.3420  |
| 812.6538   | 962.8617  | 997.4077  |
| 1048.6699  | 1140.3042 | 1253.9657 |
| 1343.5534  | 1368.3165 | 1534.8172 |
| 2138.1148  | 3096.9546 | 3179.4165 |
| 3196.0259  | 3222.6038 | 3490.0517 |

### Picture

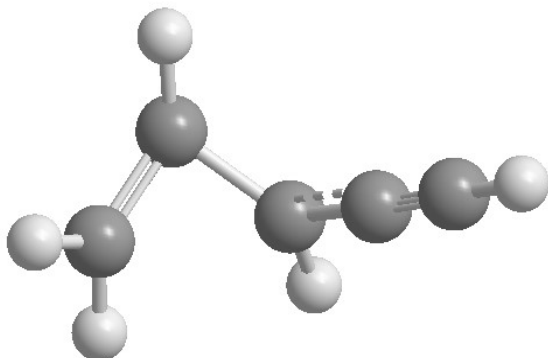

## ts i11\_i14

T1 diagnostic: 0.02606897

### Geometries

|   |           |           |           |
|---|-----------|-----------|-----------|
| C | -2.173350 | -0.154614 | 0.284817  |
| C | -1.099489 | 0.443688  | -0.243953 |
| C | 1.291618  | -0.740008 | -0.353832 |
| C | 0.176249  | -0.169153 | -0.264484 |
| C | 2.090907  | 0.291305  | 0.340059  |
| H | -3.150002 | 0.299886  | 0.213818  |
| H | -2.095119 | -1.116596 | 0.768650  |
| H | -1.191397 | 1.406022  | -0.731247 |
| H | 2.660560  | 0.999793  | -0.239968 |
| H | 2.060350  | 0.383587  | 1.413099  |

### Frequencies

|           |           |           |
|-----------|-----------|-----------|
| -589.9383 | 84.4822   | 195.3701  |
| 245.6608  | 312.1805  | 497.6836  |
| 575.4250  | 697.5540  | 874.9070  |
| 985.4902  | 990.4175  | 1012.9882 |
| 1088.7257 | 1120.4654 | 1327.3914 |
| 1440.4842 | 1455.4493 | 1673.7017 |
| 1935.4278 | 3165.9611 | 3171.9315 |
| 3181.0078 | 3270.4678 | 3283.8650 |

### Picture

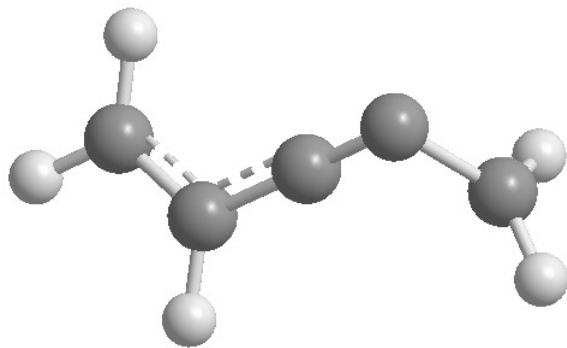

## ts i13\_i16

T1 diagnostic: 0.02051995

### Geometries

|   |           |           |           |
|---|-----------|-----------|-----------|
| C | 2.138960  | 0.289953  | -0.178427 |
| C | 1.009232  | -0.291791 | 0.104846  |
| C | -1.589922 | 0.753617  | 0.108678  |
| C | -0.281143 | -0.506412 | 0.475442  |
| C | -1.429647 | -0.382381 | -0.473314 |
| H | 2.980592  | -0.252477 | -0.592247 |
| H | 2.284039  | 1.354105  | -0.005139 |
| H | -2.063982 | 1.712238  | 0.204980  |
| H | -0.463602 | -0.982482 | 1.429540  |
| H | -1.821923 | -1.009300 | -1.260488 |

### Frequencies

|           |           |           |
|-----------|-----------|-----------|
| -739.5154 | 145.8352  | 202.2710  |
| 362.8557  | 429.9493  | 537.7785  |
| 621.3779  | 700.2608  | 832.9095  |
| 892.8502  | 896.5668  | 946.0401  |
| 997.0064  | 1090.7046 | 1171.1774 |
| 1320.3937 | 1453.2262 | 1712.0264 |
| 1862.6670 | 3085.8299 | 3170.4446 |
| 3171.2242 | 3191.2083 | 3298.1734 |

### Picture

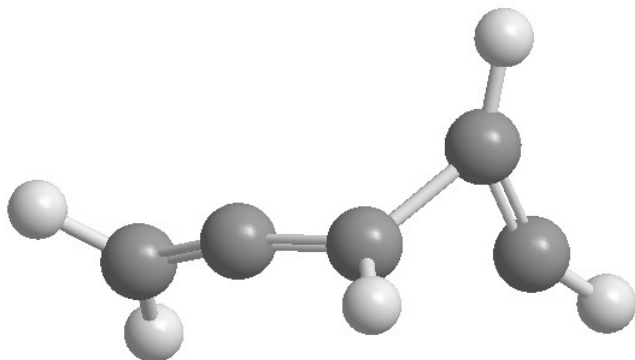

## ts i12\_i15

T1 diagnostic: 0.02380206

### Geometries

|   |           |           |           |
|---|-----------|-----------|-----------|
| C | 2.299375  | 0.162098  | 0.000014  |
| C | 0.921764  | -0.313448 | 0.000015  |
| C | -1.729042 | 0.766009  | -0.000060 |
| C | -0.327028 | -0.267922 | 0.000011  |
| C | -1.721316 | -0.538721 | 0.000019  |
| H | 2.842125  | -0.181641 | -0.880642 |
| H | 2.842049  | -0.181426 | 0.880801  |
| H | 2.327603  | 1.255977  | -0.000119 |
| H | -2.315017 | 1.669902  | -0.000114 |
| H | -2.359275 | -1.410908 | 0.000073  |

### Frequencies

|           |           |           |
|-----------|-----------|-----------|
| -718.4295 | 76.7569   | 143.7093  |
| 191.5862  | 380.6430  | 404.1702  |
| 530.7364  | 714.2761  | 789.0151  |
| 862.8847  | 1028.1759 | 1064.3354 |
| 1087.789  | 1254.6315 | 1416.9465 |
| 1481.1871 | 1492.8355 | 1649.3838 |
| 2001.6525 | 3016.3112 | 3080.3666 |
| 3102.7429 | 3185.0913 | 3252.1711 |

### Picture

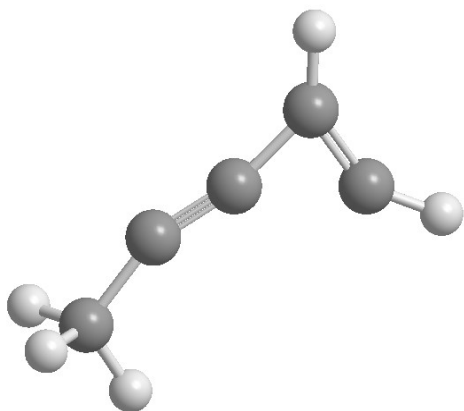

ts il\_p7

T1 diagnostic: 0.01382931

Geometries

|   |           |           |           |
|---|-----------|-----------|-----------|
| C | 1.349872  | -0.380441 | -0.516493 |
| C | 0.265737  | -0.174631 | 0.524654  |
| C | -2.278441 | 0.006804  | -0.188683 |
| C | -1.124373 | -0.074791 | 0.131811  |
| C | 1.269923  | 0.811528  | -0.014502 |
| H | 1.673155  | -1.029702 | -1.310828 |
| H | 0.417857  | -0.600910 | 1.514654  |
| H | -3.300028 | 0.081601  | -0.473534 |
| H | 1.576498  | 1.842119  | 0.009605  |
| H | 2.736212  | -1.423924 | 0.639378  |

Frequencies

|           |           |           |
|-----------|-----------|-----------|
| -616.5486 | 186.5758  | 198.2671  |
| 248.5444  | 348.3348  | 536.1560  |
| 542.2296  | 666.3986  | 670.1151  |
| 706.0412  | 846.6387  | 878.9085  |
| 917.7373  | 953.4875  | 1024.8979 |
| 1053.7815 | 1174.1107 | 1378.8478 |
| 1676.5224 | 2243.1993 | 3116.1642 |
| 3282.4620 | 3326.0220 | 3485.7641 |

Picture

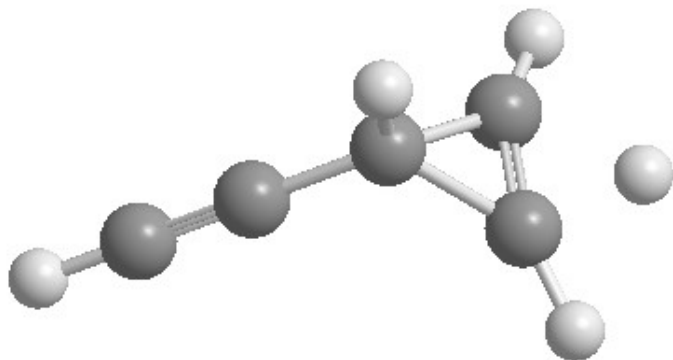

## ts i1\_p8

T1 diagnostic: 0.01615710

### Geometries

|   |           |           |           |
|---|-----------|-----------|-----------|
| C | 1.529997  | -0.690532 | -0.131651 |
| C | 0.247320  | 0.093976  | 0.113722  |
| C | -2.345514 | -0.062505 | -0.105696 |
| C | -1.147722 | 0.028558  | 0.006774  |
| C | 1.340444  | 0.785442  | -0.081752 |
| H | 1.969248  | -1.216241 | 0.709221  |
| H | 1.686763  | -1.165081 | -1.095796 |
| H | -3.398525 | -0.133886 | -0.205466 |
| H | 1.794801  | 1.748093  | -0.218174 |
| H | 0.200562  | -0.162517 | 2.001836  |

### Frequencies

|           |           |           |
|-----------|-----------|-----------|
| -943.6713 | 186.1818  | 229.5677  |
| 316.4004  | 461.2348  | 491.4509  |
| 513.0436  | 642.2301  | 660.1815  |
| 671.3160  | 737.8497  | 948.9295  |
| 1002.2534 | 1031.8016 | 1075.7561 |
| 1098.0491 | 1161.1577 | 1521.9348 |
| 1752.1995 | 2226.6426 | 3080.9658 |
| 3156.9525 | 3293.6895 | 3487.9571 |

### Picture

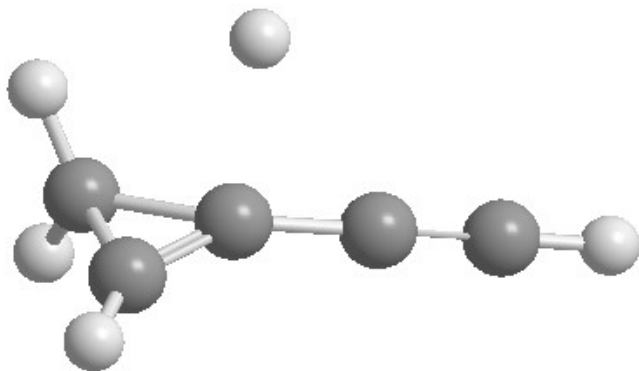

## ts i10\_p9

T1 diagnostic: 0.01559292

### Geometries

|   |           |           |           |
|---|-----------|-----------|-----------|
| C | -2.256407 | 0.000570  | 0.157083  |
| C | -0.961216 | -0.000545 | -0.047384 |
| C | 1.622043  | 0.656593  | 0.040938  |
| C | 0.334938  | -0.000097 | 0.076339  |
| C | 1.622494  | -0.655988 | 0.043140  |
| H | -2.959858 | -0.000741 | -0.664945 |
| H | -2.668025 | 0.002677  | 1.159701  |
| H | -0.884028 | -0.006049 | -2.160441 |
| H | 2.169857  | 1.580297  | 0.019707  |
| H | 2.170942  | -1.579387 | 0.025287  |

### Frequencies

|           |           |           |
|-----------|-----------|-----------|
| -309.3236 | 106.3621  | 197.7339  |
| 231.7335  | 337.4205  | 456.3595  |
| 534.5494  | 663.5997  | 664.2071  |
| 727.5308  | 881.3269  | 883.8997  |
| 911.0040  | 982.2293  | 1047.1006 |
| 1065.2920 | 1368.2371 | 1511.8017 |
| 1654.3263 | 2047.9126 | 3125.3160 |
| 3202.7373 | 3268.1643 | 3311.2685 |

### Picture

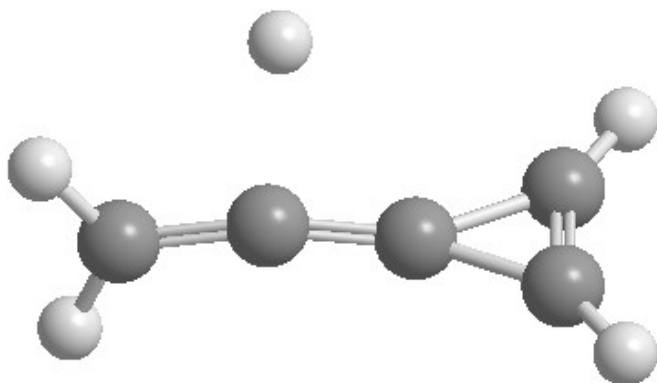

## ts i16\_i19

T1 diagnostic: 0.02304596

### Geometries

|   |           |           |           |
|---|-----------|-----------|-----------|
| C | 1.503895  | -0.464967 | 0.000035  |
| C | 0.916348  | 0.731515  | 0.000344  |
| C | -0.325773 | 1.172860  | -0.000316 |
| C | -1.268334 | 0.025020  | 0.000494  |
| C | -0.761882 | -1.195062 | -0.000309 |
| H | 1.867689  | -0.904827 | -0.921911 |
| H | 1.870570  | -0.904304 | 0.921070  |
| H | -0.656463 | 2.198549  | -0.001631 |
| H | -2.339623 | 0.200806  | 0.001259  |
| H | -1.127687 | -2.206425 | -0.000278 |

### Frequencies

|           |           |           |
|-----------|-----------|-----------|
| -516.7104 | 259.0309  | 412.0885  |
| 531.1483  | 537.8356  | 670.5616  |
| 682.6664  | 827.3157  | 864.4459  |
| 877.6546  | 892.2048  | 980.6439  |
| 1003.4833 | 1119.2294 | 1218.8557 |
| 1318.4068 | 1471.6783 | 1626.1214 |
| 1812.8336 | 3126.2844 | 3143.8322 |
| 3203.0307 | 3235.2028 | 3277.6301 |

### Picture

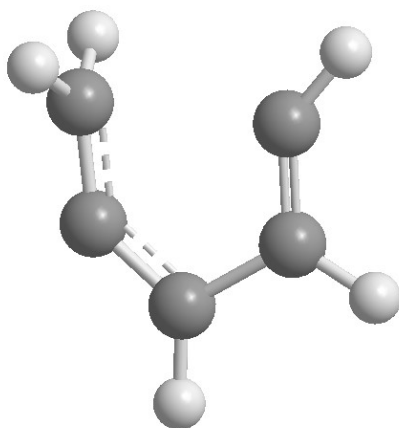



## ts i2\_i26

T1 diagnostic: 0.02496451

### Geometry

|   |           |           |           |
|---|-----------|-----------|-----------|
| C | -1.914845 | 0.448484  | 0.345831  |
| C | -1.574433 | -0.379726 | -0.525538 |
| C | -0.199298 | -0.541733 | 0.046831  |
| C | 2.161195  | 0.068347  | 0.171034  |
| C | 0.901522  | 0.268172  | -0.293007 |
| H | -2.265114 | 1.146761  | 1.071846  |
| H | -0.060125 | -1.366318 | 0.732461  |
| H | 2.382411  | -0.726607 | 0.869094  |
| H | 2.980633  | 0.689852  | -0.152862 |
| H | 0.717346  | 1.075053  | -0.991448 |

### Frequencies

|           |           |           |
|-----------|-----------|-----------|
| -540.0456 | 172.2925  | 181.8204  |
| 307.1668  | 514.2437  | 584.9689  |
| 611.5855  | 772.9987  | 846.9418  |
| 861.9288  | 919.8062  | 1020.1003 |
| 1079.2028 | 1194.7462 | 1294.4555 |
| 1310.2078 | 1445.1077 | 1559.0496 |
| 1791.1534 | 3166.7671 | 3176.9853 |
| 3188.5389 | 3265.2190 | 3415.5042 |

### Picture

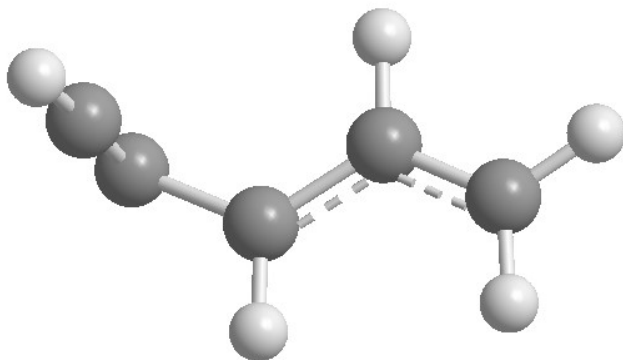

## ts i26\_i11

T1 diagnostic: 0.01713153

### Geometry

|   |           |           |           |
|---|-----------|-----------|-----------|
| C | -2.039955 | 0.302526  | 0.035813  |
| C | -1.005114 | -0.553595 | 0.047278  |
| C | 1.188129  | 0.946235  | 0.065818  |
| C | 0.330486  | -0.121365 | -0.226451 |
| C | 1.928091  | -0.216095 | 0.004953  |
| H | -3.047472 | -0.049493 | 0.192299  |
| H | -1.886253 | 1.357949  | -0.130845 |
| H | -1.171205 | -1.610782 | 0.202774  |
| H | 2.600029  | -0.729180 | 0.683051  |
| H | 1.095077  | -1.114728 | -0.511750 |

### Frequencies

|            |           |           |
|------------|-----------|-----------|
| -1049.8406 | 141.4145  | 207.3997  |
| 278.6593   | 509.3009  | 625.0063  |
| 667.4253   | 716.1102  | 836.6230  |
| 933.0980   | 993.9990  | 1008.7216 |
| 1052.6738  | 1084.5635 | 1231.8492 |
| 1332.9762  | 1437.8799 | 1503.0949 |
| 1610.3938  | 2074.9269 | 3166.3054 |
| 3176.2113  | 3193.3054 | 3275.3672 |

### Picture

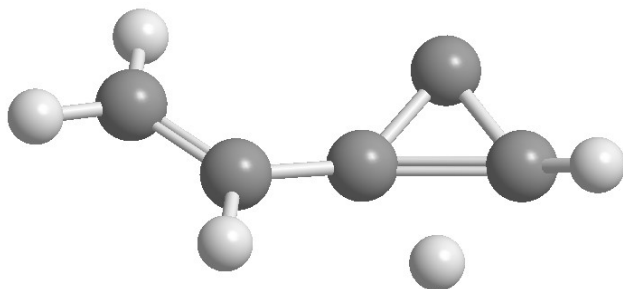

ts i3\_i27

T1 diagnostic: 0.01928282

Geometry

|   |           |           |           |
|---|-----------|-----------|-----------|
| C | -0.776093 | -0.183286 | -0.000022 |
| C | -1.994824 | 0.055253  | -0.000008 |
| C | 0.385167  | -1.051586 | -0.000079 |
| C | 0.743033  | 1.127952  | 0.000091  |
| C | 1.412195  | -0.198422 | -0.000003 |
| H | -2.893332 | 0.623672  | 0.000030  |
| H | 0.358498  | -2.132101 | -0.000164 |
| H | 0.722778  | 1.708830  | 0.914439  |
| H | 0.722790  | 1.708964  | -0.914172 |
| H | 2.472402  | -0.408831 | -0.000006 |

Frequencies

|           |           |           |
|-----------|-----------|-----------|
| -772.9821 | 209.0868  | 290.1797  |
| 384.6357  | 521.9081  | 627.1501  |
| 651.8737  | 702.2964  | 771.3533  |
| 826.6283  | 955.8483  | 995.8478  |
| 1051.0702 | 1053.2206 | 1116.3505 |
| 1346.8890 | 1458.8070 | 1668.2784 |
| 1944.2604 | 3120.6194 | 3191.1548 |
| 3210.5740 | 3217.9852 | 3438.3643 |

Picture

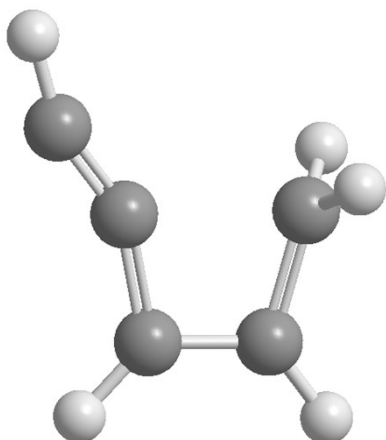

## ts i22\_i28

T1 diagnostic: 0.02130402

### Geometry

|   |           |           |           |
|---|-----------|-----------|-----------|
| C | -1.069167 | 0.009633  | -0.084774 |
| C | -2.270113 | 0.040856  | 0.041639  |
| C | 0.315881  | -0.021749 | -0.264863 |
| C | 1.297411  | 1.006789  | 0.086170  |
| C | 1.204520  | -1.027286 | 0.062370  |
| H | -3.326864 | 0.070735  | 0.153386  |
| H | 1.251441  | 1.463735  | 1.066734  |
| H | 2.066848  | 1.326396  | -0.607369 |
| H | 0.953818  | -1.840611 | 0.745428  |
| H | 2.183570  | -1.069715 | -0.401435 |

### Frequencies

|           |           |           |
|-----------|-----------|-----------|
| -999.5114 | 185.7387  | 209.3078  |
| 459.7152  | 548.3447  | 592.4644  |
| 606.6782  | 630.1529  | 687.5910  |
| 695.2653  | 813.0317  | 928.9764  |
| 963.8638  | 1045.4757 | 1277.1222 |
| 1418.9186 | 1443.0009 | 1540.1011 |
| 2152.3692 | 3101.5966 | 3150.0362 |
| 3217.7868 | 3265.4027 | 3480.5839 |

### Picture

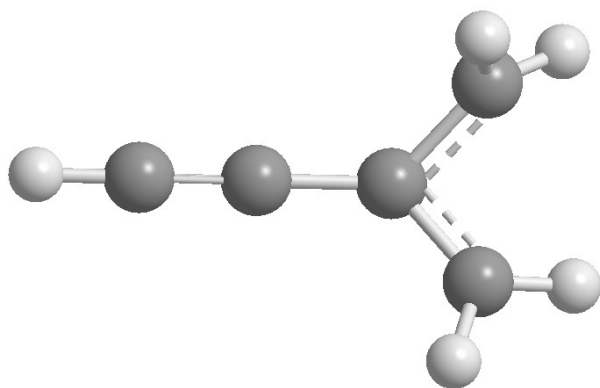

## ts i10\_i29

T1 diagnostic: 0.02815775

### Geometry

|   |           |           |           |
|---|-----------|-----------|-----------|
| C | -1.651532 | -0.241497 | 0.021916  |
| C | -0.418913 | -0.812412 | -0.167193 |
| C | -0.944236 | 0.908670  | -0.038688 |
| C | 1.957797  | 0.004030  | -0.176896 |
| C | 0.711386  | -0.094911 | 0.401353  |
| H | -2.667516 | -0.589684 | -0.024162 |
| H | -0.753814 | 1.637984  | -0.813727 |
| H | 2.755903  | 0.522386  | 0.329868  |
| H | 2.145202  | -0.396796 | -1.160804 |
| H | 0.593208  | 0.242832  | 1.425869  |

### Frequencies

|           |           |           |
|-----------|-----------|-----------|
| -678.2539 | 228.4654  | 307.1963  |
| 474.5672  | 507.2519  | 533.8377  |
| 616.2877  | 757.3659  | 803.8439  |
| 888.2948  | 940.2319  | 980.2344  |
| 1091.4200 | 1152.7705 | 1180.4362 |
| 1267.5343 | 1387.7930 | 1493.2025 |
| 1546.1222 | 3137.2224 | 3176.7871 |
| 3179.3220 | 3271.4888 | 3278.8417 |

### Picture

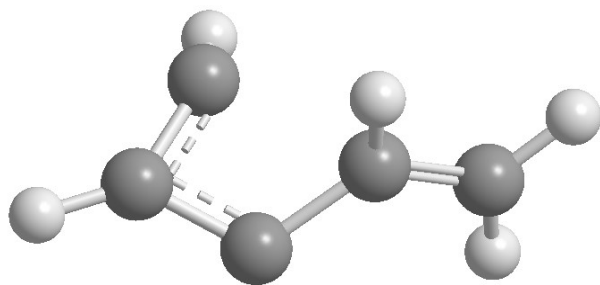

## ts i29\_i31

T1 diagnostic: 0.01939651

### Geometry

|   |           |           |           |
|---|-----------|-----------|-----------|
| C | -1.637310 | 0.011946  | 0.066133  |
| C | -0.790223 | -0.927434 | -0.419068 |
| C | -0.464208 | 0.810151  | 0.090074  |
| C | 1.903339  | -0.002100 | -0.159177 |
| C | 0.598444  | -0.101177 | 0.416006  |
| H | -2.695561 | 0.192335  | 0.052173  |
| H | -0.285752 | 1.652705  | -0.573569 |
| H | 2.730344  | -0.557883 | 0.249887  |
| H | 2.068743  | 0.579451  | -1.052820 |
| H | 0.521975  | -0.614922 | 1.360524  |

### Frequencies

|           |           |           |
|-----------|-----------|-----------|
| -245.1127 | 319.9510  | 336.2429  |
| 362.2691  | 554.6089  | 627.8110  |
| 671.7263  | 791.3182  | 894.2474  |
| 945.0888  | 1005.0123 | 1049.4213 |
| 1150.9068 | 1206.9774 | 1254.8715 |
| 1321.5295 | 1421.3929 | 1496.5824 |
| 1499.7264 | 3114.1345 | 3180.3889 |
| 3217.9267 | 3288.5423 | 3292.2906 |

### Picture

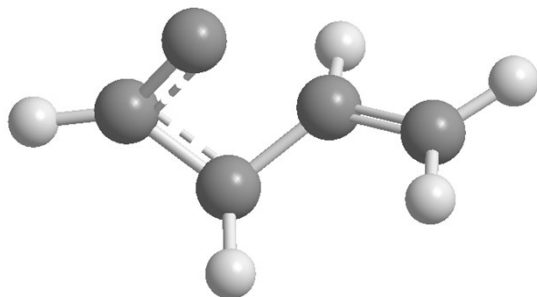

## ts i29\_i30

T1 diagnostic: 0.02684554

### Geometry

|   |           |           |           |
|---|-----------|-----------|-----------|
| C | 1.643413  | -0.263327 | -0.001941 |
| C | 0.427527  | -0.843263 | 0.094440  |
| C | 0.891519  | 0.924258  | 0.062259  |
| C | -1.984089 | -0.007627 | 0.103106  |
| C | -0.683168 | -0.122898 | -0.331369 |
| H | 2.668944  | -0.560672 | -0.087669 |
| H | 0.657373  | 1.510606  | 0.941965  |
| H | -2.414681 | -0.764324 | 0.742226  |
| H | -2.618718 | 0.787847  | -0.252836 |
| H | -0.064130 | 0.903689  | -0.902659 |

### Frequencies

|            |           |           |
|------------|-----------|-----------|
| -1459.7293 | 196.4741  | 293.7663  |
| 509.5945   | 525.7112  | 553.2648  |
| 578.0466   | 685.4901  | 727.4511  |
| 856.5511   | 967.6858  | 1043.9021 |
| 1069.1777  | 1126.6808 | 1194.3346 |
| 1281.0761  | 1404.4362 | 1492.5456 |
| 1530.5694  | 1922.4589 | 3167.5620 |
| 3169.3157  | 3268.8508 | 3311.5015 |

### Picture

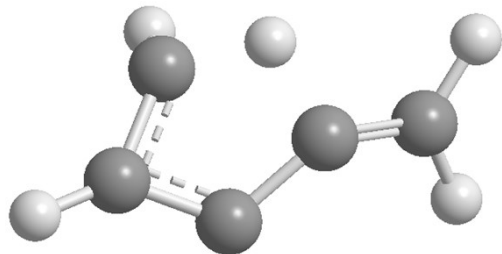

## ts i31\_i33

T1 diagnostic: 0.02010529

### Geometry

|   |           |           |           |
|---|-----------|-----------|-----------|
| C | 1.688886  | 0.258471  | 0.339717  |
| C | 1.626213  | -0.709267 | -0.514295 |
| C | 0.267640  | 0.460775  | -0.129003 |
| C | -2.127462 | 0.040338  | -0.068416 |
| C | -0.856187 | -0.294953 | 0.266222  |
| H | 2.290860  | 0.937696  | 0.915523  |
| H | 0.083772  | 1.354136  | -0.717244 |
| H | -2.334597 | 0.916556  | -0.666135 |
| H | -2.967377 | -0.555615 | 0.252022  |
| H | -0.667194 | -1.184962 | 0.850483  |

### Frequencies

|           |           |           |
|-----------|-----------|-----------|
| -359.1631 | 178.0359  | 252.8069  |
| 296.3683  | 478.3374  | 592.1781  |
| 664.4845  | 817.2003  | 904.0376  |
| 920.5963  | 994.6866  | 1028.2385 |
| 1066.1074 | 1214.2377 | 1301.3404 |
| 1311.5181 | 1445.2635 | 1558.1708 |
| 1673.2099 | 3138.6095 | 3169.2325 |
| 3201.0543 | 3268.8062 | 3274.5277 |

### Picture

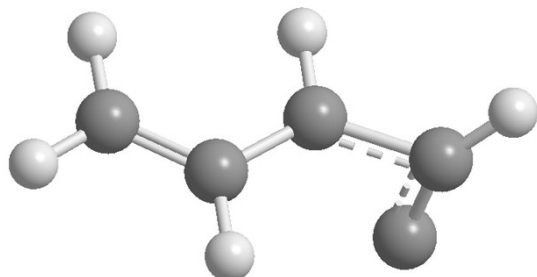



## ts i33\_i16

T1 diagnostic: 0.02358839

### Geometry

|   |           |           |           |
|---|-----------|-----------|-----------|
| C | 1.500218  | 0.178565  | 0.160060  |
| C | 1.227221  | -1.150002 | -0.030091 |
| C | 0.350636  | 0.949039  | -0.120929 |
| C | -1.989092 | -0.161453 | 0.110806  |
| C | -0.708285 | 0.033743  | -0.140714 |
| H | 2.479148  | 0.548656  | 0.439217  |
| H | 0.287860  | 1.997037  | -0.393751 |
| H | -2.489560 | -1.084940 | -0.154524 |
| H | -2.570525 | 0.601173  | 0.621330  |
| H | 0.008880  | -1.161275 | -0.387064 |

### Frequencies

|            |           |           |
|------------|-----------|-----------|
| -1258.8043 | 212.7251  | 284.6816  |
| 462.5362   | 508.0913  | 682.2782  |
| 745.4025   | 767.9988  | 865.9490  |
| 874.8737   | 937.7480  | 981.4520  |
| 1042.4108  | 1101.8657 | 1195.5201 |
| 1343.4698  | 1420.9942 | 1458.3992 |
| 1758.4450  | 1967.8499 | 3147.6620 |
| 3194.0963  | 3229.4672 | 3242.7114 |

### Picture

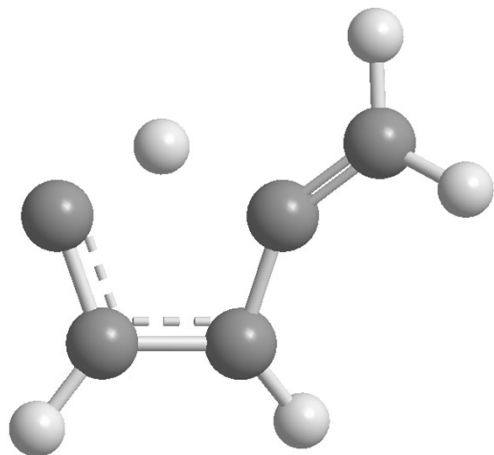

## ts i30\_i32

T1 diagnostic: 0.01711198

### Geometry

|   |           |           |           |
|---|-----------|-----------|-----------|
| C | -0.276931 | -0.115597 | -0.003586 |
| C | 1.072984  | -0.022103 | 0.273240  |
| C | -1.403442 | -0.786596 | -0.048508 |
| C | -1.561692 | 0.692187  | -0.030994 |
| C | 2.292200  | -0.070774 | -0.260658 |
| H | 1.662075  | 1.063272  | 0.051476  |
| H | -1.893637 | -1.730558 | 0.081457  |
| H | -1.890170 | 1.194540  | 0.876676  |
| H | -1.796663 | 1.226301  | -0.946842 |
| H | 3.179689  | 0.063745  | 0.360273  |

### Frequencies

|           |           |           |
|-----------|-----------|-----------|
| -995.3089 | 141.9522  | 165.4104  |
| 338.2834  | 401.9353  | 610.2416  |
| 623.3587  | 731.6608  | 939.2789  |
| 965.0297  | 992.4894  | 1024.4896 |
| 1074.8326 | 1101.1422 | 1149.1888 |
| 1264.8072 | 1517.0249 | 1612.9380 |
| 1768.9726 | 2271.9832 | 3059.3814 |
| 3068.7980 | 3130.9289 | 3309.0770 |

### Picture

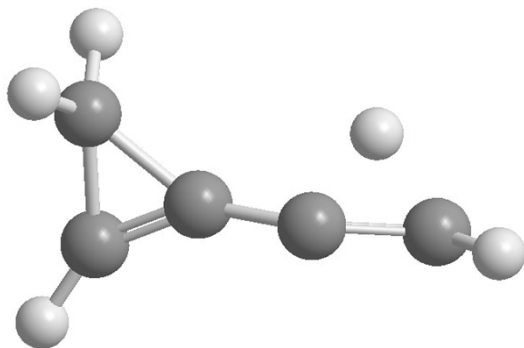

ts i32\_i1

T1 diagnostic: 0.01390449

### Geometry

|   |           |           |           |
|---|-----------|-----------|-----------|
| C | -0.262989 | -0.107536 | 0.045849  |
| C | 1.136201  | -0.030791 | 0.035367  |
| C | -1.421388 | -0.773040 | -0.042264 |
| C | -1.530874 | 0.714017  | -0.044551 |
| C | 2.354106  | 0.053928  | -0.173658 |
| H | 0.516131  | -0.038192 | 1.231525  |
| H | -1.928175 | -1.711758 | -0.165175 |
| H | -1.878805 | 1.235732  | 0.848590  |
| H | -1.732286 | 1.244195  | -0.976626 |
| H | 3.372799  | 0.130555  | 0.137232  |

### Frequencies

|            |           |           |
|------------|-----------|-----------|
| -1869.9098 | 186.5982  | 226.6440  |
| 337.8426   | 455.3763  | 490.7980  |
| 565.4470   | 621.4371  | 668.7144  |
| 755.0737   | 964.1637  | 990.0516  |
| 1025.6036  | 1062.1249 | 1082.8262 |
| 1143.6054  | 1497.1373 | 1586.7547 |
| 1667.2162  | 2074.3457 | 3058.6658 |
| 3131.3784  | 3316.2477 | 3414.0840 |

### Picture

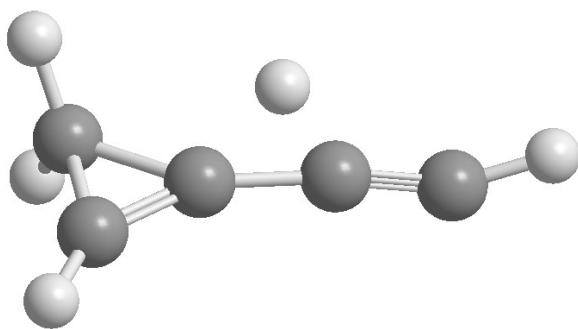

**ts i10\_i2**

T1 diagnostic: 0.01751694

Geometry

|   |           |           |           |
|---|-----------|-----------|-----------|
| C | 1.639240  | -0.472147 | 0.000095  |
| C | 1.784321  | 0.875514  | -0.000170 |
| C | 0.298006  | -0.168075 | 0.000136  |
| C | -2.099841 | 0.348719  | 0.000036  |
| C | -1.036250 | -0.517912 | -0.000094 |
| H | 2.294025  | -1.320658 | 0.000095  |
| H | -1.953115 | 1.418725  | 0.000291  |
| H | -3.111366 | -0.021479 | -0.000127 |
| H | -1.224438 | -1.585913 | -0.000351 |
| H | 0.482042  | 1.112737  | 0.000077  |

Frequencies

|           |           |           |
|-----------|-----------|-----------|
| -656.1013 | 94.0761   | 267.5654  |
| 272.4187  | 548.9586  | 565.1989  |
| 658.7730  | 748.0923  | 780.7342  |
| 921.2701  | 936.8764  | 1005.6681 |
| 1061.4375 | 1173.5581 | 1234.6519 |
| 1394.6773 | 1403.9469 | 1535.7713 |
| 1629.3009 | 2217.6799 | 3157.6711 |
| 3174.9349 | 3277.8708 | 3317.1968 |

Picture

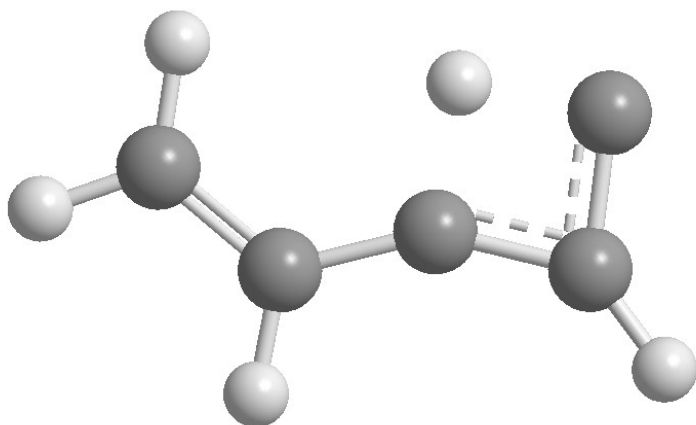

### ts i30\_i14

T1 diagnostic: 0.01361473

#### Geometry

|   |           |           |           |
|---|-----------|-----------|-----------|
| C | 2.279531  | 0.239299  | 0.000062  |
| C | 1.106102  | -0.343349 | -0.000061 |
| C | -0.218438 | -0.379792 | -0.000081 |
| C | -1.482986 | -0.661802 | -0.000002 |
| C | -1.659130 | 0.793930  | 0.000001  |
| H | 2.374368  | 1.325507  | 0.000205  |
| H | 3.203166  | -0.333253 | 0.000100  |
| H | -2.110285 | -1.543598 | 0.000282  |
| H | -1.808350 | 1.330856  | -0.930731 |
| H | -1.809370 | 1.330767  | 0.930632  |

#### Frequencies

|           |           |           |
|-----------|-----------|-----------|
| -732.4614 | 151.6608  | 172.5730  |
| 276.8421  | 345.1963  | 493.7912  |
| 569.2902  | 767.3543  | 785.6001  |
| 823.7509  | 913.1008  | 1008.6304 |
| 1050.6624 | 1074.2220 | 1227.0598 |
| 1435.9197 | 1466.4924 | 1720.9477 |
| 1992.9305 | 3099.2581 | 3130.4150 |
| 3186.3901 | 3206.2925 | 3237.9621 |

#### Picture

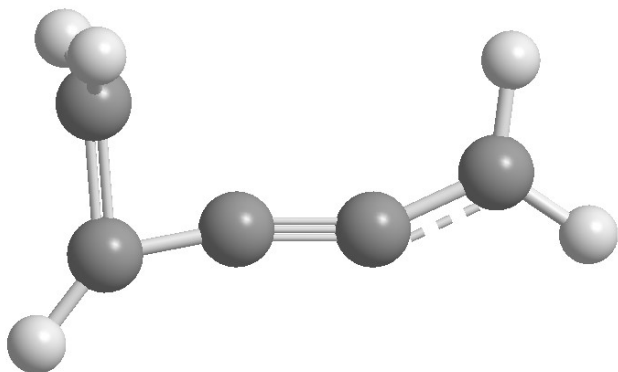

### ts i31\_i26

T1 diagnostic: 0.02010529

#### Geometry

|   |           |           |           |
|---|-----------|-----------|-----------|
| C | 1.688886  | 0.258471  | 0.339717  |
| C | 1.626213  | -0.709267 | -0.514295 |
| C | 0.267640  | 0.460775  | -0.129003 |
| C | -2.127462 | 0.040338  | -0.068416 |
| C | -0.856187 | -0.294953 | 0.266222  |
| H | 2.290860  | 0.937696  | 0.915523  |
| H | 0.083772  | 1.354136  | -0.717244 |
| H | -2.334597 | 0.916556  | -0.666135 |
| H | -2.967377 | -0.555615 | 0.252022  |
| H | -0.667194 | -1.184962 | 0.850483  |

#### Frequencies

|           |           |           |
|-----------|-----------|-----------|
| -359.1631 | 178.0359  | 252.8069  |
| 296.3683  | 478.3374  | 592.1781  |
| 664.4845  | 817.2003  | 904.0376  |
| 920.5963  | 994.6866  | 1028.2385 |
| 1066.1074 | 1214.2377 | 1301.3404 |
| 1311.5181 | 1445.2635 | 1558.1708 |
| 1673.2099 | 3138.6095 | 3169.2325 |
| 3201.0543 | 3268.8062 | 3274.5277 |

#### Picture

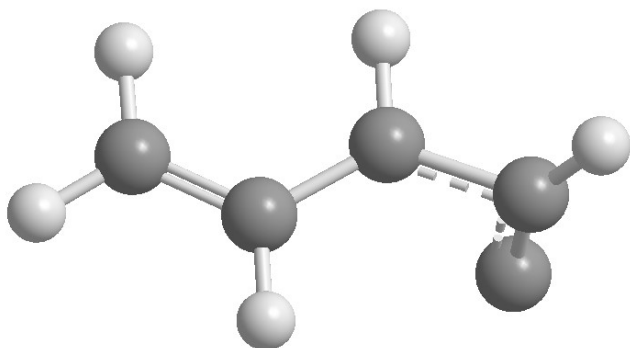

**ts i31\_i16**

T1 diagnostic: 0.02358839

Geometry

|   |           |           |           |
|---|-----------|-----------|-----------|
| C | 1.500218  | 0.178565  | 0.160060  |
| C | 1.227221  | -1.150002 | -0.030091 |
| C | 0.350636  | 0.949039  | -0.120929 |
| C | -1.989092 | -0.161453 | 0.110806  |
| C | -0.708285 | 0.033743  | -0.140714 |
| H | 2.479148  | 0.548656  | 0.439217  |
| H | 0.287860  | 1.997037  | -0.393751 |
| H | -2.489560 | -1.084940 | -0.154524 |
| H | -2.570525 | 0.601173  | 0.621330  |
| H | 0.008880  | -1.161275 | -0.387064 |

Frequencies

|            |           |           |
|------------|-----------|-----------|
| -1258.8043 | 212.7251  | 284.6816  |
| 462.5362   | 508.0913  | 682.2782  |
| 745.4025   | 767.9988  | 865.9490  |
| 874.8737   | 937.7480  | 981.4520  |
| 1042.4108  | 1101.8657 | 1195.5201 |
| 1343.4698  | 1420.9942 | 1458.3992 |
| 1758.445   | 1967.8499 | 3147.6620 |
| 3194.0963  | 3229.4672 | 3242.7114 |

Picture

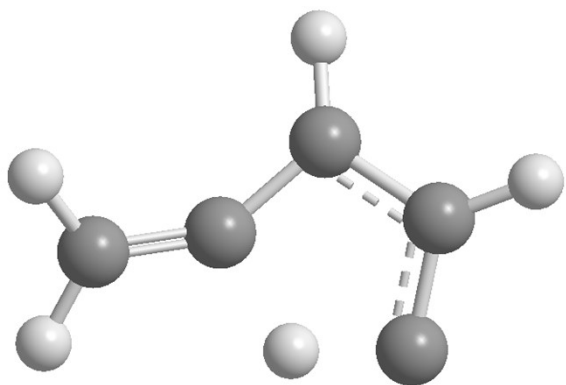



## References

1. Krishnan, R.; Binkley, J. S.; Seeger, R.; Pople, J. A., Self-Consistent Molecular Orbital Methods. XX. A Basis Set for Correlated Wave Functions. *J. Chem. Phys.* **1980**, *72* (1), 650-654.
2. Hariharan, P. C.; Pople, J. A., The Influence of Polarization Functions on Molecular Orbital Hydrogenation Energies. *Theor. Chim. Acta* **1973**, *28* (3), 213-222.
3. Kendall, R. A.; Dunning Jr, T. H.; Harrison, R. J., Electron Affinities of the First-row Atoms Revisited. Systematic Basis Sets and Wave Functions. *J. Chem. Phys.* **1992**, *96* (9), 6796-6806.
4. Dunning Jr, T. H., Gaussian Basis Sets for Use in Correlated Molecular Calculations. I. the Atoms Boron through Neon and Hydrogen. *J. Chem. Phys.* **1989**, *90* (2), 1007-1023.
5. Weigend, F.; Ahlrichs, R., Balanced Basis Sets of Split Valence, Triple Zeta Valence and Quadruple Zeta Valence Quality for H to Rn: Design and Assessment of Accuracy. *Phys. Chem. Chem. Phys.* **2005**, *7* (18), 3297-3305.
6. Rappoport, D.; Furche, F., Property-Optimized Gaussian Basis Sets for Molecular Response Calculations. *J. Chem. Phys.* **2010**, *133* (13), 134105.
7. Jensen, F., Polarization Consistent Basis Sets. III. The Importance of Diffuse Functions. *J. Chem. Phys.* **2002**, *117* (20), 9234-9240.
8. Jensen, F., Polarization Consistent Basis Sets: Principles. *J. Chem. Phys.* **2001**, *115* (20), 9113-9125.
9. Noro, T.; Sekiya, M.; Koga, T., Segmented Contracted Basis Sets for Atoms H through Xe: Sapporo-(DK)-*n*ZP sets (*n* = D, T, Q). *Theor. Chem. Acc.* **2012**, *131* (2), 1124.
